# Supplementary material for: Digital Health Initiative for HIV Testing Promotion in War-Affected Ukraine: Effectiveness Evaluation
Source: Research Square preprint supplement (doi:10.21203/rs.3.rs-6640828/v1), 2025-09-30
Supplement: Supplementary file 1 [file 2aba18ea9d55f0b8d64f180b.xlsx]

## Sheet: data
ID	Registration timestamp	Initial screening	HIV Infection Risk	Recent potential HIV exposure	Risky Behavior	Key Population Member	PWID partner	Experience with Opioid Substitution Therapy (OST)	Sex with Unknown HIV Status Partner	Chemsex Experience	STI History	PWID (People Who Inject Drugs)	Former/Current Prisoners	MSM (Men who have Sex with Men)	SW (Sex Workers)	Transgender People	Partners of PLHIV	Referred for Testing (Used Search, Received Information and Motivation)	Region	Conversion to and use ARTporuch	ARTporuch registration timestamp
1	2024-05-22	0	0	0	0	0	0	0	0	0	0	0	0	0	0	0	0	0	N-A	0
2	2025-01-02	1	1	1	1	0	0	0	0	0	0	0	0	0	0	0	0	1	UA-KY	0
3	2024-01-26	1	1	1	0	0	0	0	0	0	0	0	0	0	0	0	0	1	UA-KY	0
4	2022-08-12	1	1	0	1	1	0	0	0	0	0	0	0	1	0	0	0	1	UA-ZA	0
5	2024-07-29	1	1	0	1	0	0	0	0	0	0	0	0	0	0	0	0	1	UA-KY	0
6	2023-08-28	1	0	0	0	0	0	0	0	0	0	0	0	0	0	0	0	0	N-A	0
7	2024-04-09	1	1	1	0	0	0	0	0	0	0	0	0	0	0	0	0	1	UA-KY	0
8	2022-08-03	1	0	0	0	0	0	0	0	0	0	0	0	0	0	0	0	0	N-A	0
9	2022-08-03	1	0	0	0	0	0	0	0	0	0	0	0	0	0	0	0	0	N-A	0
10	2022-06-07	1	1	1	0	0	0	0	0	0	0	0	0	0	0	0	0	1	UA-KY	1	2024-06-26
11	2023-08-30	1	1	0	1	0	0	0	0	0	0	0	0	0	0	0	0	1	UA-KH	0
12	2022-08-03	1	1	0	1	0	0	0	0	0	0	0	0	0	0	0	0	0	N-A	0
13	2022-10-06	1	0	0	0	0	0	0	0	0	0	0	0	0	0	0	0	1	UA-KH	0
14	2024-06-11	1	0	0	0	0	0	0	0	0	0	0	0	0	0	0	0	1	UA-KY	0
15	2025-01-07	1	0	0	0	0	0	0	0	0	0	0	0	0	0	0	0	1	UA-KY	0
16	2022-08-09	1	0	0	0	0	0	0	0	0	0	0	0	0	0	0	0	1	UA-KY	0
17	2023-08-10	0	0	0	0	0	0	0	0	0	0	0	0	0	0	0	0	0	N-A	0
18	2024-01-21	1	0	0	0	0	0	0	0	0	0	0	0	0	0	0	0	0	N-A	0
19	2022-08-02	1	0	0	0	0	0	0	0	0	0	0	0	0	0	0	0	0	N-A	0
20	2023-12-01	1	1	0	1	0	0	0	1	0	0	0	0	0	0	0	0	1	UA-LV	0
21	2022-08-03	1	1	1	1	0	0	0	0	0	0	0	0	0	0	0	0	1	UA-CN	0
22	2022-08-02	1	1	0	1	1	0	0	0	0	0	0	0	1	0	0	0	1	UA-KY	0
23	2023-12-01	1	0	0	0	0	0	0	0	0	0	0	0	0	0	0	0	1	UA-KY	0
24	2024-01-18	1	0	0	0	0	0	0	0	0	0	0	0	0	0	0	0	1	UA-KO	0
25	2024-01-24	1	1	0	1	1	0	0	0	1	0	0	0	1	0	0	0	1	UA-KY	0
26	2024-03-19	0	0	0	0	0	0	0	0	0	0	0	0	0	0	0	0	0	N-A	0
27	2023-07-22	1	1	0	1	0	0	0	0	0	0	0	0	0	0	0	0	1	UA-TE	0
28	2022-08-03	1	0	0	0	0	0	0	0	0	0	0	0	0	0	0	0	0	N-A	0
29	2022-07-07	1	1	0	1	0	0	0	0	0	0	0	0	0	0	0	0	1	UA-KY	1	2023-02-16
30	2024-10-07	1	0	0	0	0	0	0	0	0	0	0	0	0	0	0	0	1	UA-KY	0
31	2022-08-04	1	0	0	0	0	0	0	0	0	0	0	0	0	0	0	0	1	UA-KY	0
32	2024-03-06	1	0	0	0	0	0	0	0	0	0	0	0	0	0	0	0	1	UA-DP	0
33	2024-05-05	1	0	0	0	0	0	0	0	0	0	0	0	0	0	0	0	1	UA-LV	0
34	2022-08-03	1	0	0	0	0	0	0	0	0	0	0	0	0	0	0	0	1	UA-VI	0
35	2024-07-05	1	0	0	0	0	0	0	0	0	0	0	0	0	0	0	0	1	UA-KO	0
36	2023-12-01	1	0	0	0	0	0	0	0	0	0	0	0	0	0	0	0	1	UA-KY	0
37	2022-09-21	1	1	0	1	0	0	0	0	0	0	0	0	0	0	0	0	1	UA-KY	0
38	2024-05-24	1	1	0	1	0	0	0	0	0	0	0	0	0	0	0	0	1	UA-KY	0
39	2022-08-03	1	0	0	0	0	0	0	0	0	0	0	0	0	0	0	0	1	UA-VO	0
40	2024-11-13	1	0	0	0	0	0	0	0	0	0	0	0	0	0	0	0	1	UA-IF	0
41	2022-08-02	1	1	0	1	0	0	0	0	0	0	0	0	0	0	0	0	0	N-A	0
42	2022-08-03	1	1	1	0	0	0	0	0	0	0	0	0	0	0	0	0	0	N-A	0
43	2023-12-02	1	0	0	0	0	0	0	0	0	0	0	0	0	0	0	0	1	UA-DP	0
44	2022-08-09	1	1	0	1	0	0	0	0	0	0	0	0	0	0	0	0	1	UA-KY	0
45	2022-08-07	1	1	0	1	0	0	0	0	0	0	0	0	0	0	0	0	0	N-A	0
46	2022-10-31	1	1	1	0	0	0	0	0	0	0	0	0	0	0	0	0	1	UA-LV	0
47	2022-08-03	1	0	0	0	0	0	0	0	0	0	0	0	0	0	0	0	0	N-A	0
48	2023-11-22	1	0	0	0	0	0	0	0	0	0	0	0	0	0	0	0	0	N-A	0
49	2022-08-03	1	0	0	0	0	0	0	0	0	0	0	0	0	0	0	0	0	N-A	0
50	2023-04-05	1	0	0	0	0	0	0	0	0	0	0	0	0	0	0	0	0	N-A	0
51	2022-08-03	1	1	0	1	0	1	0	1	1	1	0	0	0	0	0	0	1	UA-KY	0
52	2024-09-04	0	0	0	0	0	0	0	0	0	0	0	0	0	0	0	0	0	N-A	0
53	2023-06-24	1	0	0	0	0	0	0	0	0	0	0	0	0	0	0	0	1	UA-KO	0
54	2024-09-04	0	0	0	0	0	0	0	0	0	0	0	0	0	0	0	0	0	N-A	0
55	2023-07-12	1	0	0	0	0	0	0	0	0	0	0	0	0	0	0	0	1	UA-OD	0
56	2022-08-03	1	0	0	0	0	0	0	0	0	0	0	0	0	0	0	0	1	UA-KY	0
57	2024-06-02	1	1	1	1	1	0	0	0	0	0	0	0	1	0	0	0	1	UA-LV	0
58	2022-08-03	1	1	0	1	0	1	0	1	0	1	0	0	0	0	0	0	1	UA-VI	0
59	2022-08-02	1	1	0	0	1	0	0	0	0	0	0	0	1	0	0	0	0	N-A	0
60	2023-06-01	1	0	0	0	0	0	0	0	0	0	0	0	0	0	0	0	0	N-A	0
61	2022-08-09	1	0	0	0	0	0	0	0	0	0	0	0	0	0	0	0	1	UA-KY	0
62	2023-05-26	1	0	0	0	0	0	0	0	0	0	0	0	0	0	0	0	0	N-A	0
63	2022-08-03	1	1	1	1	0	0	0	0	0	0	0	0	0	0	0	0	0	N-A	0
64	2023-12-01	1	1	0	1	0	0	0	0	0	0	0	0	0	0	0	0	1	UA-KY	0
65	2022-08-03	1	1	0	1	0	0	0	0	0	0	0	0	0	0	0	0	1	UA-KY	0
66	2023-10-05	0	0	0	0	0	0	0	0	0	0	0	0	0	0	0	0	0	N-A	0
67	2024-06-16	1	1	0	1	0	0	0	0	0	0	0	0	0	0	0	0	1	UA-ZH	0
68	2024-03-01	1	1	0	1	0	0	0	0	0	0	0	0	0	0	0	0	1	UA-ZP	0
69	2022-08-04	1	1	1	1	0	0	0	0	0	0	0	0	0	0	0	0	1	UA-KY	0
70	2022-08-26	1	0	0	0	0	0	0	0	0	0	0	0	0	0	0	0	0	N-A	0
71	2024-04-11	1	0	0	0	0	0	0	0	0	0	0	0	0	0	0	0	1	UA-OD	0
72	2022-08-09	1	0	0	0	0	0	0	0	0	0	0	0	0	0	0	0	0	N-A	0
73	2023-11-29	1	1	0	1	1	0	0	0	0	0	0	0	1	0	0	0	1	UA-KY	0
74	2022-08-04	1	0	0	0	0	0	0	0	0	0	0	0	0	0	0	0	1	UA-KY	0
75	2024-08-17	1	0	0	0	0	0	0	0	0	0	0	0	0	0	0	0	1	UA-LV	0
76	2022-08-02	1	1	0	1	0	0	0	0	0	0	0	0	0	0	0	0	1	UA-KY	0
77	2024-11-06	1	0	0	0	0	0	0	0	0	0	0	0	0	0	0	0	1	UA-LV	0
78	2024-05-05	1	0	0	0	0	0	0	0	0	0	0	0	0	0	0	0	0	N-A	1	2024-05-05
79	2022-08-03	1	1	0	1	0	0	0	0	1	0	0	0	0	0	0	0	1	UA-ZA	0
80	2023-09-29	0	0	0	0	0	0	0	0	0	0	0	0	0	0	0	0	0	N-A	0
81	2024-09-27	1	1	0	1	0	0	0	0	0	0	0	0	0	0	0	0	1	UA-KO	0
82	2024-06-12	1	1	1	0	0	0	0	0	0	0	0	0	0	0	0	0	1	UA-KY	0
83	2022-08-02	1	1	0	1	0	0	0	0	0	0	0	0	0	0	0	0	0	N-A	0
84	2022-07-12	1	1	0	1	0	0	0	1	0	0	0	0	0	0	0	0	1	UA-IF	1	2023-09-01
85	2023-11-21	0	0	0	0	0	0	0	0	0	0	0	0	0	0	0	0	0	N-A	0
86	2022-08-03	1	0	0	0	0	0	0	0	0	0	0	0	0	0	0	0	0	N-A	0
87	2024-10-14	1	1	1	0	0	0	0	0	0	0	0	0	0	0	0	0	1	UA-KY	0
88	2024-07-01	1	0	0	0	0	0	0	0	0	0	0	0	0	0	0	0	1	UA-KY	0
89	2023-12-06	1	0	0	0	0	0	0	0	0	0	0	0	0	0	0	0	1	UA-KY	0
90	2022-08-03	1	0	0	0	0	0	0	0	0	0	0	0	0	0	0	0	0	N-A	0
91	2024-02-23	1	1	0	1	0	0	0	0	0	0	0	0	0	0	0	0	1	UA-KO	0
92	2024-02-22	1	0	0	0	0	0	0	0	0	0	0	0	0	0	0	0	1	UA-KY	0
93	2024-12-04	1	1	0	1	0	0	0	0	0	0	0	0	0	0	0	0	1	UA-KY	0
94	2023-09-22	0	0	0	0	0	0	0	0	0	0	0	0	0	0	0	0	0	N-A	0
95	2022-07-21	1	1	0	1	1	1	1	0	1	0	1	1	0	0	0	0	1	UA-MY	1	2022-12-08
96	2022-08-03	1	0	0	0	0	0	0	0	0	0	0	0	0	0	0	0	0	N-A	0
97	2023-04-06	1	0	0	0	0	0	0	0	0	0	0	0	0	0	0	0	1	UA-MY	0
98	2022-08-05	1	0	0	0	0	0	0	0	0	0	0	0	0	0	0	0	0	N-A	0
99	2022-10-28	1	1	1	1	1	0	0	0	0	0	0	0	0	0	0	1	1	UA-KY	0
100	2022-08-04	1	0	0	0	0	0	0	0	0	0	0	0	0	0	0	0	0	N-A	0
101	2023-11-29	1	0	0	0	0	0	0	0	0	0	0	0	0	0	0	0	1	UA-KY	0
102	2024-07-29	1	1	0	1	0	0	0	1	0	0	0	0	0	0	0	0	1	UA-KY	0
103	2024-09-27	1	0	0	0	0	0	0	0	0	0	0	0	0	0	0	0	1	UA-KH	0
104	2024-08-21	1	0	0	0	0	0	0	0	0	0	0	0	0	0	0	0	1	UA-IF	0
105	2022-07-12	1	1	1	0	0	0	0	0	0	0	0	0	0	0	0	0	0	N-A	0
106	2024-06-12	1	0	0	0	0	0	0	0	0	0	0	0	0	0	0	0	0	N-A	0
107	2024-03-20	1	0	0	0	0	0	0	0	0	0	0	0	0	0	0	0	0	N-A	0
108	2022-12-01	1	1	0	1	0	0	0	0	0	0	0	0	0	0	0	0	1	UA-KY	0
109	2023-11-11	1	0	0	0	0	0	0	0	0	0	0	0	0	0	0	0	1	UA-OD	0
110	2022-08-04	1	1	0	1	1	0	0	0	0	0	0	0	1	0	0	0	1	UA-KY	0
111	2022-08-03	1	1	0	1	0	1	0	1	1	1	0	0	0	0	0	0	1	UA-KH	0
112	2022-08-03	1	0	0	0	0	0	0	0	0	0	0	0	0	0	0	0	0	N-A	0
113	2023-04-19	1	0	0	0	0	0	0	0	0	0	0	0	0	0	0	0	1	UA-ZP	0
114	2022-08-09	1	1	0	1	0	0	0	0	0	0	0	0	0	0	0	0	1	UA-KY	0
115	2022-08-02	1	1	0	0	1	0	0	0	0	0	0	0	0	0	1	0	1	UA-VO	0
116	2024-04-13	1	1	0	0	1	0	0	0	0	0	0	0	1	0	0	0	1	UA-KY	0
117	2022-08-03	1	1	0	1	0	0	0	0	0	0	0	0	0	0	0	0	0	N-A	0
118	2023-11-16	1	1	1	0	0	0	0	0	0	0	0	0	0	0	0	0	1	UA-KY	0
119	2022-08-02	1	1	1	1	0	0	0	0	0	0	0	0	0	0	0	0	0	N-A	0
120	2022-10-05	1	1	0	0	1	0	0	0	0	0	0	0	1	0	0	0	1	UA-KY	0
121	2024-12-09	1	0	0	0	0	0	0	0	0	0	0	0	0	0	0	0	1	UA-CN	0
122	2024-05-28	1	0	0	0	0	0	0	0	0	0	0	0	0	0	0	0	0	N-A	0
123	2022-11-09	1	0	0	0	0	0	0	0	0	0	0	0	0	0	0	0	0	N-A	0
124	2022-08-02	1	1	1	1	0	0	0	0	0	0	0	0	0	0	0	0	1	UA-KY	0
125	2024-05-13	1	1	0	1	0	0	0	0	0	0	0	0	0	0	0	0	1	UA-CH	0
126	2024-04-19	1	1	1	0	0	0	0	0	0	0	0	0	0	0	0	0	1	UA-KO	0
127	2024-07-19	1	1	1	0	0	0	0	0	0	0	0	0	0	0	0	0	0	N-A	0
128	2023-11-23	0	0	0	0	0	0	0	0	0	0	0	0	0	0	0	0	0	N-A	0
129	2024-08-06	1	0	0	0	0	0	0	0	0	0	0	0	0	0	0	0	1	UA-KO	0
130	2024-06-10	1	1	1	0	0	0	0	0	0	0	0	0	0	0	0	0	1	UA-KH	0
131	2023-02-17	1	0	0	0	0	0	0	0	0	0	0	0	0	0	0	0	0	N-A	0
132	2023-01-25	1	0	0	0	0	1	1	1	1	0	0	0	0	0	0	0	0	N-A	0
133	2022-08-03	1	0	0	0	0	0	0	0	0	0	0	0	0	0	0	0	1	UA-CG	0
134	2024-10-14	1	1	0	1	0	0	0	1	0	0	0	0	0	0	0	0	1	UA-KH	0
135	2024-07-28	1	1	0	1	1	0	0	0	0	0	0	0	1	0	0	0	1	UA-MY	0
136	2022-07-25	1	1	0	1	1	0	0	1	1	0	0	0	1	0	0	0	1	UA-KY	0
137	2023-12-05	1	0	0	0	0	0	0	0	0	0	0	0	0	0	0	0	0	N-A	0
138	2024-06-13	1	1	0	1	0	0	0	0	0	0	0	0	0	0	0	0	1	UA-KY	0
139	2024-04-04	1	1	1	1	0	0	0	0	0	0	0	0	0	0	0	0	1	UA-KY	0
140	2022-08-09	1	1	1	1	0	0	0	0	0	0	0	0	0	0	0	0	1	UA-OD	0
141	2024-08-30	0	0	0	0	0	0	0	0	0	0	0	0	0	0	0	0	0	N-A	0
142	2022-08-03	1	0	0	0	0	0	0	0	0	0	0	0	0	0	0	0	1	UA-KY	0
143	2025-01-12	1	1	1	0	0	0	0	0	0	0	0	0	0	0	0	0	1	UA-KY	0
144	2022-11-10	1	1	1	0	0	0	0	0	0	0	0	0	0	0	0	0	0	N-A	0
145	2022-08-03	1	1	0	1	0	0	0	0	0	0	0	0	0	0	0	0	0	N-A	0
146	2022-08-03	1	0	0	0	0	0	0	0	0	0	0	0	0	0	0	0	0	N-A	0
147	2024-10-09	1	1	0	1	0	0	0	0	0	0	0	0	0	0	0	0	1	UA-OD	0
148	2022-11-14	1	1	1	0	0	0	0	0	0	0	0	0	0	0	0	0	1	UA-LV	0
149	2023-04-27	1	1	0	1	0	0	0	0	1	0	0	0	0	0	0	0	1	UA-KY	0
150	2022-08-03	1	1	0	1	0	0	0	1	0	0	0	0	0	0	0	0	1	UA-KY	0
151	2024-04-26	1	0	0	0	0	0	0	0	0	0	0	0	0	0	0	0	1	UA-KO	0
152	2022-11-07	1	0	0	0	0	0	0	0	0	0	0	0	0	0	0	0	0	N-A	0
153	2022-08-09	1	1	0	1	0	0	0	1	0	0	0	0	0	0	0	0	1	UA-KY	0
154	2022-07-21	1	1	0	0	1	0	0	0	0	0	0	0	1	0	0	0	1	UA-OD	1	2023-03-18
155	2022-08-06	1	0	0	0	0	0	0	0	0	0	0	0	0	0	0	0	1	UA-KY	0
156	2024-09-08	0	0	0	0	0	0	0	0	0	0	0	0	0	0	0	0	0	N-A	0
157	2022-07-25	1	0	0	0	0	0	0	1	0	0	0	0	0	0	0	0	1	UA-IF	1	2024-01-19
158	2022-08-02	1	1	0	1	0	0	0	0	0	0	0	0	0	0	0	0	1	UA-KY	0
159	2023-03-15	1	0	0	0	0	1	0	0	0	1	0	0	0	0	0	0	1	UA-LV	0
160	2024-05-05	1	1	0	1	0	0	0	0	0	0	0	0	0	0	0	0	1	UA-KO	0
161	2022-08-02	1	0	0	0	0	0	0	0	0	0	0	0	0	0	0	0	0	N-A	0
162	2024-01-26	1	0	0	0	0	0	0	0	0	0	0	0	0	0	0	0	0	N-A	0
163	2024-10-27	1	0	0	0	0	0	0	0	0	0	0	0	0	0	0	0	1	UA-KY	0
164	2024-12-07	1	1	0	1	0	0	0	0	0	0	0	0	0	0	0	0	1	UA-KY	0
165	2024-01-31	1	1	0	1	0	0	0	0	1	0	0	0	0	0	0	0	1	UA-ZP	0
166	2025-01-03	1	0	0	0	0	0	0	0	0	0	0	0	0	0	0	0	1	UA-KY	0
167	2023-07-01	1	0	0	0	0	0	0	0	0	0	0	0	0	0	0	0	1	UA-KY	0
168	2023-12-05	1	1	0	1	0	1	0	0	0	1	0	0	0	0	0	0	1	UA-KO	0
169	2024-02-21	1	0	0	0	0	0	0	0	0	0	0	0	0	0	0	0	1	UA-KY	0
170	2023-12-01	1	0	0	0	0	0	0	0	0	0	0	0	0	0	0	0	1	UA-ZH	0
171	2023-07-19	1	0	0	0	0	0	0	1	0	0	0	0	0	0	0	0	0	N-A	0
172	2023-07-13	1	1	0	1	1	1	1	1	1	1	0	1	0	0	1	0	1	UA-KY	0
173	2023-11-23	1	1	0	1	0	0	0	0	0	0	0	0	0	0	0	0	1	UA-LV	0
174	2023-11-24	0	0	0	0	0	0	0	0	0	0	0	0	0	0	0	0	0	N-A	0
175	2024-10-02	1	1	0	1	0	0	0	0	1	0	0	0	0	0	0	0	1	UA-KY	0
176	2024-04-22	1	1	1	0	0	0	0	0	0	0	0	0	0	0	0	0	1	UA-KY	0
177	2022-08-02	1	1	0	1	1	0	0	0	0	0	0	0	1	0	0	0	0	N-A	0
178	2024-11-05	1	1	0	1	0	0	0	0	0	0	0	0	0	0	0	0	1	UA-KY	0
179	2024-12-01	1	0	0	0	0	0	0	0	0	0	0	0	0	0	0	0	1	UA-KY	0
180	2024-05-06	1	0	0	0	0	0	0	0	0	0	0	0	0	0	0	0	1	UA-KY	0
181	2022-08-02	1	0	0	0	0	0	0	0	0	0	0	0	0	0	0	0	0	N-A	0
182	2024-12-28	1	1	1	1	0	0	0	0	0	0	0	0	0	0	0	0	1	UA-OD	0
183	2024-03-25	1	0	0	0	0	0	0	0	0	0	0	0	0	0	0	0	1	UA-KY	0
184	2022-08-10	1	0	0	0	0	0	0	0	0	0	0	0	0	0	0	0	1	UA-RI	0
185	2022-08-03	1	1	0	1	0	0	0	0	0	0	0	0	0	0	0	0	1	UA-KY	0
186	2022-08-02	1	1	0	1	1	0	0	0	0	0	0	0	1	0	0	0	1	UA-KY	1	2024-10-14
187	2022-10-12	1	0	0	0	0	0	0	0	0	0	0	0	0	0	0	0	1	UA-KY	0
188	2024-08-06	1	1	1	1	0	0	0	0	0	0	0	0	0	0	0	0	1	UA-KY	0
189	2023-07-29	1	1	0	0	1	0	0	0	0	0	0	0	1	0	0	0	1	UA-PO	0
190	2023-12-25	1	1	0	1	0	0	0	0	0	0	0	0	0	0	0	0	1	UA-KO	0
191	2024-05-05	1	1	0	1	1	0	0	0	0	0	1	0	0	0	0	0	1	UA-KO	0
192	2024-10-14	1	0	0	0	0	0	0	0	0	0	0	0	0	0	0	0	1	UA-ZA	0
193	2022-08-09	1	1	0	1	0	0	0	0	0	0	0	0	0	0	0	0	1	UA-KY	0
194	2023-11-10	1	1	0	1	0	0	0	0	0	0	0	0	0	0	0	0	1	UA-KY	0
195	2023-08-18	1	0	0	0	0	0	0	0	0	0	0	0	0	0	0	0	1	UA-CH	0
196	2022-08-02	1	0	0	0	0	0	0	0	0	0	0	0	0	0	0	0	0	N-A	0
197	2024-09-08	0	0	0	0	0	0	0	0	0	0	0	0	0	0	0	0	0	N-A	0
198	2024-03-17	1	0	0	0	0	0	0	0	0	0	0	0	0	0	0	0	1	UA-KO	0
199	2023-08-04	1	1	0	1	0	0	0	0	0	0	0	0	0	0	0	0	1	UA-KY	0
200	2023-08-15	1	1	0	1	0	0	0	0	0	0	0	0	0	0	0	0	1	UA-KY	0
201	2022-08-02	1	0	0	0	0	0	0	0	0	0	0	0	0	0	0	0	1	UA-KY	0
202	2024-05-06	1	1	1	0	0	0	0	0	0	0	0	0	0	0	0	0	1	UA-VI	0
203	2024-12-10	1	1	1	1	0	0	0	0	0	0	0	0	0	0	0	0	1	UA-KO	0
204	2024-03-02	1	0	0	0	0	0	0	0	0	0	0	0	0	0	0	0	1	UA-KY	0
205	2022-08-02	1	0	0	0	0	0	0	0	0	0	0	0	0	0	0	0	0	N-A	0
206	2024-02-07	1	0	0	0	0	0	0	0	0	0	0	0	0	0	0	0	1	UA-KY	0
207	2024-11-30	1	1	0	1	0	0	0	0	0	0	0	0	0	0	0	0	1	UA-KY	0
208	2024-05-04	1	0	0	0	0	0	0	0	0	0	0	0	0	0	0	0	1	UA-KY	0
209	2022-10-03	1	1	0	1	0	0	0	0	0	0	0	0	0	0	0	0	1	UA-KY	0
210	2022-08-04	1	1	0	1	0	0	0	0	0	0	0	0	0	0	0	0	1	UA-KY	0
211	2022-08-02	1	0	0	0	0	0	0	0	0	0	0	0	0	0	0	0	1	UA-KY	0
212	2024-11-14	1	1	0	1	0	0	0	0	0	0	0	0	0	0	0	0	1	UA-DP	0
213	2023-07-04	1	0	0	0	0	0	0	0	0	0	0	0	0	0	0	0	1	UA-KY	0
214	2022-08-04	1	0	0	0	0	0	0	0	0	0	0	0	0	0	0	0	1	UA-CG	0
215	2025-01-15	1	1	0	1	0	0	0	0	0	0	0	0	0	0	0	0	1	UA-KY	0
216	2023-12-02	1	0	0	0	0	0	0	0	0	0	0	0	0	0	0	0	1	UA-LV	0
217	2022-08-06	1	1	0	1	0	0	0	0	0	0	0	0	0	0	0	0	0	N-A	0
218	2024-10-09	1	1	0	1	0	0	0	1	1	0	0	0	0	0	0	0	1	UA-KY	0
219	2023-04-03	1	1	0	1	1	0	0	0	0	0	0	0	1	1	1	0	1	UA-DP	0
220	2022-08-03	1	1	1	1	1	0	0	0	0	0	0	0	1	0	0	0	1	UA-LV	0
221	2023-12-01	1	0	0	0	0	0	0	0	0	0	0	0	0	0	0	0	0	N-A	0
222	2024-11-15	1	1	0	1	1	0	0	0	0	0	0	0	1	0	0	0	1	UA-KY	0
223	2024-09-30	1	0	0	0	0	0	0	0	0	0	0	0	0	0	0	0	1	UA-KH	0
224	2024-06-10	1	0	0	0	0	0	0	0	0	0	0	0	0	0	0	0	1	UA-ZH	0
225	2023-12-01	1	0	0	0	0	0	0	0	0	0	0	0	0	0	0	0	1	UA-KY	0
226	2022-08-11	1	0	0	0	0	0	0	0	0	0	0	0	0	0	0	0	1	UA-KY	0
227	2022-08-12	1	1	0	1	1	0	0	0	0	0	0	0	1	0	0	0	1	UA-ZP	0
228	2024-01-14	1	0	0	0	0	0	0	0	0	0	0	0	0	0	0	0	1	UA-KY	0
229	2023-09-14	0	0	0	0	0	0	0	0	0	0	0	0	0	0	0	0	0	N-A	0
230	2025-01-13	1	0	0	0	0	0	0	0	0	0	0	0	0	0	0	0	1	UA-KY	0
231	2022-11-08	1	1	0	1	1	0	0	0	0	0	0	0	0	0	1	0	1	UA-KY	0
232	2023-11-22	0	0	0	0	0	0	0	0	0	0	0	0	0	0	0	0	0	N-A	0
233	2022-08-03	1	1	0	1	0	0	0	0	0	0	0	0	0	0	0	0	1	UA-KY	0
234	2023-04-04	1	0	0	0	0	0	0	0	0	0	0	0	0	0	0	0	1	UA-DP	0
235	2022-08-03	1	1	0	1	0	0	0	1	0	0	0	0	0	0	0	0	1	UA-DO	1	2022-08-03
236	2022-08-03	1	1	0	1	0	0	0	1	0	0	0	0	0	0	0	0	1	UA-KH	0
237	2024-05-13	1	1	0	1	0	1	0	1	0	1	0	0	0	0	0	0	1	UA-CH	0
238	2024-05-30	1	0	0	0	0	0	0	0	0	0	0	0	0	0	0	0	1	UA-KY	0
239	2024-07-19	1	0	0	0	0	0	0	0	0	0	0	0	0	0	0	0	1	UA-KY	0
240	2022-08-19	1	1	0	1	0	0	0	0	0	0	0	0	0	0	0	0	1	UA-OD	0
241	2024-12-30	1	1	1	1	0	0	0	0	0	0	0	0	0	0	0	0	1	UA-KY	0
242	2024-04-14	1	1	0	1	0	0	0	0	0	0	0	0	0	0	0	0	1	UA-KY	0
243	2023-09-11	0	0	0	0	0	0	0	0	0	0	0	0	0	0	0	0	0	N-A	0
244	2022-08-04	1	0	0	0	0	0	0	0	0	0	0	0	0	0	0	0	0	N-A	0
245	2024-10-03	1	1	0	1	0	0	0	0	0	0	0	0	0	0	0	0	1	UA-KY	0
246	2022-08-04	1	1	0	1	0	0	0	0	0	0	0	0	0	0	0	0	0	N-A	0
247	2022-08-03	1	1	0	1	0	0	0	0	0	0	0	0	0	0	0	0	0	N-A	0
248	2023-12-03	1	1	0	1	0	0	0	0	0	0	0	0	0	0	0	0	1	UA-KY	0
249	2024-01-31	1	1	0	1	0	0	0	0	0	0	0	0	0	0	0	0	1	UA-PO	0
250	2023-02-02	1	1	0	1	1	0	0	0	0	0	1	0	0	0	0	0	1	UA-VO	0
251	2022-08-04	1	1	0	1	0	0	0	1	0	0	0	0	0	0	0	0	1	UA-KY	0
252	2024-11-09	1	1	1	0	0	0	0	0	0	0	0	0	0	0	0	0	1	UA-KY	0
253	2024-03-25	1	0	0	0	0	0	0	0	0	0	0	0	0	0	0	0	1	UA-KH	0
254	2024-09-05	0	0	0	0	0	0	0	0	0	0	0	0	0	0	0	0	0	N-A	0
255	2023-04-06	1	0	0	0	0	0	0	0	0	0	0	0	0	0	0	0	0	N-A	0
256	2023-11-23	0	0	0	0	0	0	0	0	0	0	0	0	0	0	0	0	0	N-A	0
257	2023-06-27	1	0	0	0	0	0	0	0	0	0	0	0	0	0	0	0	1	UA-KO	0
258	2024-12-24	1	1	0	1	0	0	0	1	0	0	0	0	0	0	0	0	1	UA-KH	0
259	2024-12-06	1	0	0	0	0	0	0	0	0	0	0	0	0	0	0	0	1	UA-LV	0
260	2022-08-02	1	1	1	1	0	0	0	0	0	0	0	0	0	0	0	0	0	N-A	0
261	2022-08-06	1	1	0	1	1	0	0	0	0	0	0	0	1	0	0	0	1	UA-KY	0
262	2023-03-28	1	1	0	1	0	0	0	1	0	0	0	0	0	0	0	0	0	N-A	0
263	2024-07-30	1	1	0	1	0	0	0	0	0	0	0	0	0	0	0	0	1	UA-ZP	0
264	2023-12-01	1	1	0	1	0	0	0	0	0	0	0	0	0	0	0	0	1	UA-ZA	0
265	2025-01-19	1	0	0	0	0	0	0	0	0	0	0	0	0	0	0	0	0	N-A	0
266	2022-08-03	1	1	0	1	1	0	0	0	0	0	1	0	0	0	0	0	1	UA-ZA	1	2023-02-11
267	2022-08-02	1	0	0	0	0	0	0	0	0	0	0	0	0	0	0	0	0	N-A	0
268	2023-12-02	1	0	0	0	0	0	0	0	0	0	0	0	0	0	0	0	1	UA-DP	0
269	2023-04-07	1	0	0	0	0	0	0	0	0	0	0	0	0	0	0	0	1	UA-VI	0
270	2024-07-16	1	1	1	1	0	0	0	0	0	0	0	0	0	0	0	0	1	UA-PO	0
271	2024-09-07	1	0	0	0	0	0	0	0	0	0	0	0	0	0	0	0	1	UA-KY	0
272	2022-08-18	1	0	0	0	0	0	0	0	0	0	0	0	0	0	0	0	1	UA-KY	0
273	2023-04-07	1	1	0	1	0	0	0	0	0	0	0	0	0	0	0	0	1	UA-KY	0
274	2024-02-17	1	0	0	0	0	0	0	0	0	0	0	0	0	0	0	0	1	UA-KY	0
275	2023-06-23	1	0	0	0	0	0	0	0	0	0	0	0	0	0	0	0	1	UA-KO	0
276	2024-05-21	1	1	0	1	0	0	0	0	1	0	0	0	0	0	0	0	1	UA-LV	0
277	2023-08-26	1	1	1	1	0	0	0	0	0	0	0	0	0	0	0	0	1	UA-KY	0
278	2023-12-01	1	1	0	1	0	0	0	0	0	0	0	0	0	0	0	0	1	UA-VI	0
279	2024-08-01	1	1	0	0	1	0	0	0	0	0	0	0	1	0	0	0	1	UA-KY	0
280	2024-09-28	1	1	1	0	0	0	0	0	0	0	0	0	0	0	0	0	1	UA-ZP	0
281	2023-11-21	0	0	0	0	0	0	0	0	0	0	0	0	0	0	0	0	0	N-A	0
282	2022-09-25	1	1	0	1	0	0	0	1	0	0	0	0	0	0	0	0	1	UA-KY	0
283	2025-01-17	1	0	0	0	0	0	0	0	0	0	0	0	0	0	0	0	1	UA-IF	0
284	2024-05-05	1	0	0	0	0	0	0	0	0	0	0	0	0	0	0	0	1	UA-VO	0
285	2022-12-01	1	0	0	0	0	0	0	0	0	0	0	0	0	0	0	0	1	UA-CG	0
286	2024-06-27	1	1	0	1	0	0	0	1	1	0	0	0	0	0	0	0	1	UA-KY	0
287	2024-07-26	1	1	1	1	0	0	0	0	0	0	0	0	0	0	0	0	1	UA-KY	0
288	2024-01-31	1	0	0	0	0	0	0	0	0	0	0	0	0	0	0	0	0	N-A	0
289	2023-07-13	1	0	0	0	0	0	0	0	0	0	0	0	0	0	0	0	0	N-A	0
290	2024-04-25	1	1	1	1	0	0	0	0	0	0	0	0	0	0	0	0	1	UA-RI	0
291	2024-05-05	1	1	0	1	0	0	0	1	0	0	0	0	0	0	0	0	1	UA-CN	0
292	2023-03-09	1	1	0	1	0	0	0	0	0	0	0	0	0	0	0	0	0	N-A	0
293	2023-12-16	1	1	0	1	0	0	0	0	0	0	0	0	0	0	0	0	1	UA-ZH	0
294	2024-01-12	1	0	0	0	0	0	0	0	0	0	0	0	0	0	0	0	1	UA-KY	0
295	2023-04-06	1	1	0	1	0	0	0	0	0	0	0	0	0	0	0	0	1	UA-OD	0
296	2022-08-03	1	0	0	0	0	0	0	0	0	0	0	0	0	0	0	0	0	N-A	0
297	2022-08-04	1	0	0	0	0	0	0	0	0	0	0	0	0	0	0	0	0	N-A	0
298	2024-11-07	1	1	0	1	0	0	0	0	0	0	0	0	0	0	0	0	1	UA-VO	0
299	2023-11-21	0	0	0	0	0	0	0	0	0	0	0	0	0	0	0	0	0	N-A	0
300	2024-10-22	1	0	0	0	0	0	0	0	0	0	0	0	0	0	0	0	1	UA-KY	0
301	2023-11-21	0	0	0	0	0	0	0	0	0	0	0	0	0	0	0	0	0	N-A	0
302	2022-08-02	1	1	0	1	0	0	0	0	0	0	0	0	0	0	0	0	1	UA-ZA	0
303	2024-08-08	1	1	0	1	0	0	0	0	0	0	0	0	0	0	0	0	1	UA-KY	0
304	2024-04-07	1	1	0	1	1	0	0	0	0	0	0	0	1	0	0	0	1	UA-KO	0
305	2022-12-01	1	1	0	1	0	0	0	0	0	0	0	0	0	0	0	0	0	N-A	0
306	2024-05-28	1	0	0	0	0	0	0	0	0	0	0	0	0	0	0	0	1	UA-DP	0
307	2024-02-21	1	1	0	1	1	0	0	0	0	0	0	0	0	0	1	0	1	UA-KM	0
308	2022-08-03	1	0	0	0	0	0	0	0	0	0	0	0	0	0	0	0	1	UA-KY	0
309	2023-12-01	1	1	0	1	0	0	0	0	0	0	0	0	0	0	0	0	1	UA-KY	0
310	2022-08-05	1	0	0	0	0	0	0	0	0	0	0	0	0	0	0	0	0	N-A	0
311	2023-12-01	1	1	0	1	0	0	0	0	0	0	0	0	0	0	0	0	1	UA-KY	0
312	2022-08-03	1	1	0	1	0	0	0	1	0	0	0	0	0	0	0	0	0	N-A	0
313	2024-05-15	1	1	0	1	0	0	0	0	0	0	0	0	0	0	0	0	1	UA-PO	0
314	2024-06-21	1	1	0	1	0	0	0	1	0	0	0	0	0	0	0	0	1	UA-KY	0
315	2022-08-03	1	1	1	1	0	0	0	0	0	0	0	0	0	0	0	0	0	N-A	0
316	2023-11-21	0	0	0	0	0	0	0	0	0	0	0	0	0	0	0	0	0	N-A	0
317	2024-07-01	1	1	0	1	0	0	0	1	0	0	0	0	0	0	0	0	1	UA-KY	0
318	2023-08-25	1	0	0	0	0	0	0	0	0	0	0	0	0	0	0	0	0	N-A	1	2024-11-05
319	2024-12-01	1	0	0	0	0	0	0	0	0	0	0	0	0	0	0	0	1	UA-KO	0
320	2022-08-03	1	1	0	0	1	0	0	0	0	0	0	0	1	0	0	0	1	UA-PO	0
321	2024-07-14	1	1	0	1	1	0	0	1	0	0	0	0	1	0	0	0	1	UA-LV	0
322	2022-08-06	1	0	0	0	0	0	0	0	0	0	0	0	0	0	0	0	1	UA-KY	0
323	2022-08-03	1	1	0	1	0	0	0	0	0	0	0	0	0	0	0	0	1	UA-KY	0
324	2024-05-09	1	1	0	1	0	0	0	0	0	0	0	0	0	0	0	0	1	UA-KY	0
325	2024-10-15	1	1	0	1	0	0	0	0	0	0	0	0	0	0	0	0	1	UA-KY	0
326	2024-12-25	1	1	0	1	0	0	0	0	0	0	0	0	0	0	0	0	1	UA-KM	0
327	2023-12-01	1	0	0	0	0	0	0	0	0	0	0	0	0	0	0	0	1	UA-VO	0
328	2024-11-12	1	1	0	1	0	0	0	0	0	0	0	0	0	0	0	0	1	UA-KY	0
329	2023-04-04	1	1	0	1	0	0	0	0	0	0	0	0	0	0	0	0	1	UA-KY	0
330	2023-08-25	1	0	0	0	0	0	0	0	0	0	0	0	0	0	0	0	0	N-A	0
331	2022-08-03	1	1	0	1	0	1	0	1	0	1	0	0	0	0	0	0	0	N-A	0
332	2025-01-15	1	1	0	1	0	0	0	0	0	0	0	0	0	0	0	0	1	UA-VO	0
333	2022-08-05	1	1	0	1	0	0	0	0	0	0	0	0	0	0	0	0	1	UA-KY	0
334	2025-01-15	1	0	0	0	0	0	0	0	0	0	0	0	0	0	0	0	1	UA-KY	0
335	2022-08-03	1	1	0	1	1	0	0	0	0	0	0	0	0	0	1	0	1	UA-KY	0
336	2023-12-07	1	1	0	1	0	0	0	0	0	0	0	0	0	0	0	0	1	UA-KY	0
337	2024-06-14	1	1	0	1	0	0	0	1	0	0	0	0	0	0	0	0	1	UA-KY	0
338	2023-07-24	1	0	0	0	0	0	0	0	0	0	0	0	0	0	0	0	1	UA-KY	0
339	2024-12-12	1	0	0	0	0	0	0	0	0	0	0	0	0	0	0	0	1	UA-KY	0
340	2024-12-12	1	1	0	1	0	0	0	0	0	0	0	0	0	0	0	0	1	UA-KY	0
341	2024-05-05	1	1	0	1	0	0	0	0	0	0	0	0	0	0	0	0	1	UA-KO	0
342	2024-05-05	1	0	0	0	0	0	0	0	0	0	0	0	0	0	0	0	1	UA-TE	0
343	2024-04-17	1	0	0	0	0	0	0	0	0	0	0	0	0	0	0	0	1	UA-KY	0
344	2023-07-04	1	1	0	0	1	0	0	0	0	0	0	0	1	0	0	0	1	UA-KY	0
345	2024-05-05	1	1	1	0	0	0	0	0	0	0	0	0	0	0	0	0	1	UA-TE	0
346	2024-10-04	1	0	0	0	0	0	0	0	0	0	0	0	0	0	0	0	1	UA-KY	0
347	2022-08-03	1	1	0	1	0	0	0	1	0	0	0	0	0	0	0	0	0	N-A	0
348	2024-09-26	1	1	0	1	0	0	0	0	0	0	0	0	0	0	0	0	1	UA-LV	0
349	2022-08-03	1	0	0	0	0	0	0	0	0	0	0	0	0	0	0	0	0	N-A	0
350	2023-12-04	1	1	0	1	0	0	0	0	0	0	0	0	0	0	0	0	1	UA-OD	0
351	2024-10-15	1	0	0	0	0	0	0	0	0	0	0	0	0	0	0	0	0	N-A	0
352	2024-07-21	1	1	0	0	1	0	0	0	0	0	0	0	1	0	0	0	0	N-A	0
353	2024-01-11	1	1	0	1	0	0	0	0	0	0	0	0	0	0	0	0	1	UA-KH	0
354	2024-10-11	1	0	0	0	0	0	0	0	0	0	0	0	0	0	0	0	1	UA-KY	0
355	2024-06-07	1	0	0	0	0	0	0	0	0	0	0	0	0	0	0	0	0	N-A	0
356	2022-08-03	1	1	0	1	1	0	0	1	1	0	0	0	1	0	0	0	1	UA-KH	1	2023-04-03
357	2023-06-23	1	1	0	1	1	0	0	1	0	0	0	0	1	0	0	0	1	UA-KO	0
358	2023-11-21	0	0	0	0	0	0	0	0	0	0	0	0	0	0	0	0	0	N-A	0
359	2023-04-10	1	1	0	1	0	0	0	1	0	0	0	0	0	0	0	0	1	UA-KY	0
360	2024-03-26	1	0	0	0	0	0	0	0	0	0	0	0	0	0	0	0	1	UA-CG	0
361	2024-06-07	1	1	0	1	0	0	0	0	0	0	0	0	0	0	0	0	1	UA-KM	0
362	2024-11-15	1	0	0	0	0	0	0	0	0	0	0	0	0	0	0	0	0	N-A	0
363	2024-07-17	1	0	0	0	0	0	0	0	0	0	0	0	0	0	0	0	1	UA-OD	0
364	2024-03-18	1	0	0	0	0	0	0	0	0	0	0	0	0	0	0	0	1	UA-KY	0
365	2022-08-03	1	1	0	1	0	0	0	0	0	0	0	0	0	0	0	0	0	N-A	0
366	2022-08-02	1	1	0	1	0	0	0	0	0	0	0	0	0	0	0	0	0	N-A	0
367	2024-03-14	1	0	0	0	0	0	0	0	0	0	0	0	0	0	0	0	0	N-A	0
368	2023-09-17	0	0	0	0	0	0	0	0	0	0	0	0	0	0	0	0	0	N-A	0
369	2023-09-17	0	0	0	0	0	0	0	0	0	0	0	0	0	0	0	0	0	N-A	0
370	2023-08-30	0	0	0	0	0	0	0	0	0	0	0	0	0	0	0	0	0	N-A	0
371	2022-08-03	1	0	0	0	0	0	0	0	0	0	0	0	0	0	0	0	1	UA-OD	0
372	2023-07-03	1	0	0	0	0	0	0	0	0	0	0	0	0	0	0	0	1	UA-KY	0
373	2024-05-15	1	1	0	1	0	0	0	1	0	0	0	0	0	0	0	0	1	UA-KY	0
374	2023-04-06	1	1	1	0	0	0	0	0	0	0	0	0	0	0	0	0	1	UA-KI	0
375	2024-07-18	1	0	0	0	0	0	0	0	0	0	0	0	0	0	0	0	0	N-A	0
376	2023-12-02	1	1	0	1	0	0	0	0	0	0	0	0	0	0	0	0	1	UA-KY	0
377	2024-06-30	1	0	0	0	0	0	0	0	0	0	0	0	0	0	0	0	0	N-A	0
378	2022-08-03	1	0	0	0	0	0	0	0	0	0	0	0	0	0	0	0	1	UA-KY	0
379	2023-07-03	1	1	0	1	0	0	0	1	1	0	0	0	0	0	0	0	1	UA-OD	0
380	2022-08-02	1	1	0	1	0	0	0	0	0	0	0	0	0	0	0	0	1	UA-LV	0
381	2024-08-13	1	0	0	0	0	0	0	0	0	0	0	0	0	0	0	0	1	UA-KY	0
382	2024-05-06	1	0	0	0	0	0	0	0	0	0	0	0	0	0	0	0	1	UA-KY	0
383	2024-08-03	1	1	1	1	0	0	0	0	0	0	0	0	0	0	0	0	1	UA-KY	0
384	2023-12-04	1	0	0	0	0	0	0	0	0	0	0	0	0	0	0	0	1	UA-KY	0
385	2022-08-03	1	0	0	0	0	0	0	0	0	0	0	0	0	0	0	0	0	N-A	0
386	2024-09-10	0	0	0	0	0	0	0	0	0	0	0	0	0	0	0	0	0	N-A	0
387	2022-08-09	1	0	0	0	0	0	0	0	0	0	0	0	0	0	0	0	0	N-A	0
388	2022-10-27	1	0	0	0	0	0	0	0	0	0	0	0	0	0	0	0	0	N-A	0
389	2023-12-01	1	1	0	1	0	0	0	0	0	0	0	0	0	0	0	0	1	UA-DP	0
390	2023-09-07	1	1	1	1	1	0	0	0	0	0	1	0	0	0	0	0	1	UA-KY	0
391	2023-08-12	1	1	1	0	0	0	0	0	0	0	0	0	0	0	0	0	1	UA-KY	0
392	2024-06-03	1	1	1	1	0	0	0	0	0	0	0	0	0	0	0	0	1	UA-KY	0
393	2024-05-05	1	0	0	0	0	0	0	0	0	0	0	0	0	0	0	0	0	N-A	0
394	2023-04-20	1	1	0	1	1	0	0	0	0	0	0	0	1	0	0	1	1	UA-ZP	0
395	2023-11-21	0	0	0	0	0	0	0	0	0	0	0	0	0	0	0	0	0	N-A	0
396	2024-05-05	1	1	0	1	0	0	0	0	0	0	0	0	0	0	0	0	1	UA-KY	0
397	2023-12-12	1	1	1	1	0	0	0	0	0	0	0	0	0	0	0	0	1	UA-KY	0
398	2024-12-19	1	0	0	0	0	0	0	0	0	0	0	0	0	0	0	0	1	UA-KY	0
399	2022-08-03	1	0	0	0	0	0	0	0	0	0	0	0	0	0	0	0	1	UA-LU	1	2023-04-23
400	2022-08-02	1	1	0	1	0	0	0	1	0	0	0	0	0	0	0	0	1	UA-KY	0
401	2022-08-03	1	0	0	0	0	0	0	0	0	0	0	0	0	0	0	0	0	N-A	0
402	2022-08-04	1	1	0	1	0	0	0	0	0	0	0	0	0	0	0	0	1	UA-KY	1	2022-09-26
403	2023-12-24	1	0	0	0	0	0	0	0	0	0	0	0	0	0	0	0	1	UA-DO	0
404	2022-08-03	1	0	0	0	0	0	0	0	0	0	0	0	0	0	0	0	0	N-A	0
405	2023-12-13	1	0	0	0	0	0	0	0	0	0	0	0	0	0	0	0	1	UA-KO	0
406	2024-08-26	0	0	0	0	0	0	0	0	0	0	0	0	0	0	0	0	0	N-A	0
407	2022-08-03	1	1	1	1	0	0	0	0	0	0	0	0	0	0	0	0	0	N-A	0
408	2023-02-18	1	0	0	0	0	0	0	0	0	0	0	0	0	0	0	0	0	N-A	0
409	2024-07-15	1	0	0	0	0	0	0	0	0	0	0	0	0	0	0	0	1	UA-KY	0
410	2025-01-16	1	1	0	1	0	0	0	0	0	0	0	0	0	0	0	0	1	UA-KY	0
411	2024-05-23	1	1	0	1	1	0	0	0	0	0	0	0	1	0	0	0	1	UA-KY	0
412	2023-04-07	1	1	0	1	1	0	0	1	0	0	0	0	1	0	0	0	1	UA-KY	0
413	2024-09-19	1	1	1	0	0	0	0	0	0	0	0	0	0	0	0	0	1	UA-KY	0
414	2024-02-01	1	1	1	0	0	0	0	0	0	0	0	0	0	0	0	0	1	UA-DP	0
415	2024-04-29	1	1	1	1	0	0	0	0	0	0	0	0	0	0	0	0	1	UA-KY	0
416	2023-11-18	0	0	0	0	0	0	0	0	0	0	0	0	0	0	0	0	0	N-A	0
417	2024-11-02	1	0	0	0	0	0	0	0	0	0	0	0	0	0	0	0	1	UA-KY	0
418	2023-04-06	1	1	0	1	0	0	0	0	0	0	0	0	0	0	0	0	1	UA-KY	0
419	2022-08-03	1	0	0	0	0	0	0	0	0	0	0	0	0	0	0	0	1	UA-KY	0
420	2024-07-16	1	1	0	1	0	0	0	0	0	0	0	0	0	0	0	0	0	N-A	0
421	2024-07-02	1	1	1	0	0	0	0	0	0	0	0	0	0	0	0	0	1	UA-KO	0
422	2024-04-30	1	1	1	1	0	0	0	0	0	0	0	0	0	0	0	0	1	UA-KY	0
423	2023-06-01	1	0	0	0	0	0	0	0	0	0	0	0	0	0	0	0	0	N-A	0
424	2022-08-03	1	0	0	0	0	0	0	0	0	0	0	0	0	0	0	0	1	UA-KY	0
425	2024-10-27	1	0	0	0	0	0	0	0	0	0	0	0	0	0	0	0	1	UA-KY	0
426	2024-03-06	1	1	1	1	1	0	0	0	0	0	0	0	0	0	0	1	1	UA-KO	0
427	2022-09-12	1	1	0	1	1	1	0	0	1	1	0	0	1	0	0	0	0	N-A	0
428	2022-08-03	1	0	0	0	0	0	0	0	0	0	0	0	0	0	0	0	0	N-A	0
429	2022-10-11	1	1	1	1	0	0	0	0	0	0	0	0	0	0	0	0	0	N-A	0
430	2024-02-21	1	1	0	1	0	0	0	0	0	0	0	0	0	0	0	0	1	UA-CG	0
431	2024-10-14	1	0	0	0	0	0	0	0	0	0	0	0	0	0	0	0	1	UA-KY	0
432	2024-08-22	1	1	0	1	0	0	0	0	0	0	0	0	0	0	0	0	1	UA-KY	0
433	2022-08-02	1	1	0	1	0	0	0	1	0	0	0	0	0	0	0	0	1	UA-LV	0
434	2022-08-02	1	0	0	0	0	0	0	0	0	0	0	0	0	0	0	0	1	UA-ZH	0
435	2022-08-03	1	0	0	0	0	0	0	0	0	0	0	0	0	0	0	0	1	UA-CG	0
436	2023-08-15	1	0	0	0	0	0	0	0	0	0	0	0	0	0	0	0	1	UA-LV	0
437	2024-09-25	1	0	0	0	0	0	0	0	0	0	0	0	0	0	0	0	1	UA-OD	0
438	2024-12-01	1	0	0	0	0	0	0	0	0	0	0	0	0	0	0	0	1	UA-VI	0
439	2022-08-04	1	1	0	1	0	0	0	0	0	0	0	0	0	0	0	0	1	UA-ZA	0
440	2023-12-01	1	0	0	0	0	0	0	0	0	0	0	0	0	0	0	0	1	UA-OD	0
441	2024-07-05	1	0	0	0	0	0	0	0	0	0	0	0	0	0	0	0	1	UA-OD	0
442	2023-04-08	1	1	0	1	0	0	0	0	0	0	0	0	0	0	0	0	1	UA-ZA	0
443	2024-05-05	1	0	0	0	0	0	0	0	0	0	0	0	0	0	0	0	0	N-A	0
444	2023-09-25	0	0	0	0	0	0	0	0	0	0	0	0	0	0	0	0	0	N-A	0
445	2022-08-09	1	1	0	1	0	0	0	0	1	0	0	0	0	0	0	0	1	UA-LV	0
446	2024-12-18	1	0	0	0	0	0	0	0	0	0	0	0	0	0	0	0	1	UA-DP	0
447	2024-02-03	1	1	0	1	0	0	0	0	0	0	0	0	0	0	0	0	1	UA-ZH	0
448	2024-11-05	1	1	0	1	0	0	0	0	0	0	0	0	0	0	0	0	1	UA-KY	0
449	2023-05-02	1	0	0	0	0	0	0	0	0	0	0	0	0	0	0	0	0	N-A	0
450	2023-08-27	1	0	0	0	0	0	0	0	0	0	0	0	0	0	0	0	1	UA-DP	0
451	2024-08-19	1	0	0	0	0	0	0	0	0	0	0	0	0	0	0	0	1	UA-KY	0
452	2023-12-02	1	1	1	1	0	0	0	0	0	0	0	0	0	0	0	0	1	UA-DP	0
453	2023-12-21	1	1	0	1	0	0	0	0	0	0	0	0	0	0	0	0	1	UA-LV	0
454	2022-08-03	1	1	0	1	1	1	0	1	1	1	0	0	0	1	0	0	1	UA-KY	0
455	2024-07-11	1	1	0	1	0	0	0	1	0	0	0	0	0	0	0	0	1	UA-KY	0
456	2025-01-23	1	1	0	1	1	0	0	0	0	0	0	0	0	0	0	1	1	UA-KI	0
457	2023-09-27	0	0	0	0	0	0	0	0	0	0	0	0	0	0	0	0	0	N-A	0
458	2024-05-02	1	1	0	1	0	0	0	0	0	0	0	0	0	0	0	0	1	UA-KY	0
459	2024-01-17	1	1	0	1	0	0	0	0	0	0	0	0	1	0	0	0	1	UA-TE	0
460	2022-08-17	1	0	0	0	0	0	0	0	0	0	0	0	0	0	0	0	1	UA-KY	0
461	2024-05-29	1	1	1	0	0	0	0	0	0	0	0	0	0	0	0	0	1	UA-CN	0
462	2023-08-29	1	0	0	0	0	0	0	0	0	0	0	0	0	0	0	0	1	UA-KH	0
463	2024-11-10	1	1	0	1	0	0	0	0	0	0	0	0	0	0	0	0	1	UA-KO	0
464	2024-01-22	1	1	0	1	0	0	0	0	0	0	0	0	0	0	0	0	1	UA-IF	0
465	2024-05-05	1	1	0	1	0	0	0	0	0	0	0	0	0	0	0	0	1	UA-LV	0
466	2024-03-14	1	1	1	1	0	0	0	0	0	0	0	0	0	0	0	0	1	UA-SU	0
467	2023-12-04	1	0	0	0	0	0	0	0	0	0	0	0	0	0	0	0	1	UA-KY	0
468	2024-12-12	1	1	1	0	0	0	0	0	0	0	0	0	0	0	0	0	1	UA-KH	0
469	2023-04-06	1	1	1	0	0	0	0	0	0	0	0	0	0	0	0	0	1	UA-VI	0
470	2023-12-01	1	1	0	1	0	0	0	0	0	0	0	0	0	0	0	0	1	UA-KY	0
471	2024-01-12	1	1	0	1	0	0	0	0	0	0	0	0	0	0	0	0	1	UA-KY	0
472	2024-05-21	1	1	0	1	0	0	0	0	0	0	0	0	0	0	0	0	1	UA-LV	0
473	2023-11-21	0	0	0	0	0	0	0	0	0	0	0	0	0	0	0	0	0	N-A	0
474	2024-05-05	1	0	0	0	0	0	0	0	0	0	0	0	0	0	0	0	0	N-A	0
475	2024-04-15	1	1	0	1	0	0	0	0	0	0	0	0	0	0	0	0	1	UA-KY	0
476	2022-08-02	1	1	0	1	0	0	0	0	0	0	0	0	0	0	0	0	1	UA-CG	0
477	2024-02-28	1	1	0	1	0	0	0	0	0	0	0	0	0	0	0	0	1	UA-OD	0
478	2022-08-04	1	0	0	0	0	0	0	0	0	0	0	0	0	0	0	0	1	UA-KY	0
479	2022-08-03	1	0	0	0	0	0	0	0	0	0	0	0	0	0	0	0	0	N-A	0
480	2023-07-07	1	1	0	1	0	0	0	0	1	0	0	0	0	0	0	0	1	UA-KY	0
481	2022-07-07	1	1	0	1	1	0	0	0	0	0	0	0	1	0	0	0	1	UA-DP	0
482	2023-12-01	1	1	1	1	0	0	0	0	0	0	0	0	0	0	0	0	1	UA-LV	0
483	2024-11-19	1	0	0	0	0	0	0	0	0	0	0	0	0	0	0	0	1	UA-KY	0
484	2023-05-07	1	1	0	0	1	0	0	0	0	0	0	0	1	0	1	0	1	UA-KY	0
485	2024-05-19	1	1	0	1	0	0	0	0	0	0	0	0	0	0	0	0	1	UA-LV	0
486	2022-08-02	1	0	0	0	0	0	0	0	0	0	0	0	0	0	0	0	0	N-A	0
487	2024-07-05	1	0	0	0	0	0	0	0	0	0	0	0	0	0	0	0	1	UA-IF	0
488	2024-04-26	1	0	0	0	0	0	0	0	0	0	0	0	0	0	0	0	1	UA-KY	0
489	2025-01-14	1	0	0	0	0	0	0	0	0	0	0	0	0	0	0	0	1	UA-DP	0
490	2022-08-02	1	1	0	0	1	0	0	0	0	0	0	0	1	0	0	0	0	N-A	0
491	2022-08-03	1	0	0	0	0	0	0	0	0	0	0	0	0	0	0	0	0	N-A	0
492	2023-12-02	1	0	0	0	0	0	0	0	0	0	0	0	0	0	0	0	1	UA-KY	0
493	2024-12-23	1	1	0	1	0	0	0	1	0	0	0	0	0	0	0	0	1	UA-KY	0
494	2024-10-23	1	1	0	1	0	0	0	0	1	0	0	0	0	0	0	0	1	UA-IF	0
495	2023-12-03	1	1	1	1	0	0	0	0	0	0	0	0	0	0	0	0	1	UA-KH	0
496	2023-07-06	1	1	0	1	0	0	0	1	0	0	0	0	0	0	0	0	1	UA-KY	0
497	2022-08-06	1	0	0	0	0	0	0	0	0	0	0	0	0	0	0	0	0	N-A	0
498	2023-04-07	1	1	0	1	0	0	0	0	0	0	0	0	0	0	0	0	1	UA-KY	0
499	2024-10-05	1	1	0	1	0	0	0	1	0	0	0	0	0	0	0	0	1	UA-KM	0
500	2024-11-01	1	0	0	0	0	0	0	0	0	0	0	0	0	0	0	0	1	UA-LV	0
501	2022-11-21	1	1	0	1	0	0	0	0	0	0	0	0	0	0	0	0	1	UA-KH	0
502	2023-09-21	0	0	0	0	0	0	0	0	0	0	0	0	0	0	0	0	0	N-A	0
503	2025-01-02	1	1	0	1	0	0	0	0	0	0	0	0	0	0	0	0	1	UA-KY	0
504	2022-08-06	1	1	0	1	1	0	0	0	0	0	0	0	1	0	0	0	0	N-A	0
505	2022-08-02	1	0	0	0	0	0	0	0	0	0	0	0	0	0	0	0	0	N-A	0
506	2022-08-03	1	0	0	0	0	0	0	0	0	0	0	0	0	0	0	0	1	UA-KY	0
507	2023-08-22	1	0	0	0	0	0	0	0	0	0	0	0	0	0	0	0	1	UA-KY	0
508	2024-01-31	1	1	0	1	0	0	0	0	0	0	0	0	0	0	0	0	1	UA-KY	0
509	2023-12-02	1	1	0	1	0	0	0	0	0	0	0	0	0	0	0	0	1	UA-KY	0
510	2024-06-23	1	1	0	1	0	0	0	0	0	0	0	0	0	0	0	0	1	UA-KY	0
511	2024-05-08	1	1	1	0	0	0	0	0	0	0	0	0	0	0	0	0	1	UA-ZP	0
512	2023-11-28	1	0	0	0	0	0	0	0	0	0	0	0	0	0	0	0	1	UA-KY	0
513	2023-11-10	1	1	0	1	0	0	0	0	0	0	0	0	0	0	0	0	1	UA-KY	0
514	2024-07-08	1	1	0	1	0	0	0	0	0	0	0	0	0	0	0	0	1	UA-KO	0
515	2024-03-26	1	0	0	0	0	0	0	0	0	0	0	0	0	0	0	0	1	UA-PO	0
516	2023-02-16	1	0	0	0	0	0	0	0	0	0	0	0	0	0	0	0	1	UA-KY	0
517	2023-04-06	1	0	0	0	0	0	0	0	0	0	0	0	0	0	0	0	1	UA-KY	0
518	2022-08-04	1	1	0	1	1	0	0	0	0	0	0	0	1	0	0	1	1	UA-OD	1	2023-04-02
519	2024-09-16	1	0	0	0	0	0	0	0	0	0	0	0	0	0	0	0	1	UA-KY	0
520	2024-09-23	1	1	0	1	0	0	0	0	0	0	0	0	0	0	0	0	1	UA-KY	0
521	2024-09-28	1	0	0	0	0	0	0	0	0	0	0	0	0	0	0	0	0	N-A	0
522	2022-09-11	1	1	0	1	1	0	0	0	0	0	0	0	1	0	0	0	1	UA-KY	0
523	2024-10-01	1	1	0	1	0	0	0	0	0	0	0	0	0	0	0	0	1	UA-KY	0
524	2023-09-03	1	0	0	0	0	0	0	0	0	0	0	0	0	0	0	0	0	N-A	0
525	2022-08-03	1	1	0	1	1	0	0	0	0	0	0	0	1	0	0	0	1	UA-LV	0
526	2024-12-12	1	1	0	1	0	0	0	0	0	0	0	0	0	0	0	0	1	UA-LV	0
527	2024-05-17	1	0	0	0	0	0	0	0	0	0	0	0	0	0	0	0	0	N-A	0
528	2024-05-05	1	0	0	0	0	0	0	0	0	0	0	0	0	0	0	0	0	N-A	0
529	2024-01-10	1	1	0	1	0	0	0	0	0	0	0	0	0	0	0	0	1	UA-OD	0
530	2022-08-07	1	1	1	1	1	0	0	0	0	0	0	0	1	0	0	1	1	UA-OD	0
531	2023-12-02	1	1	0	1	0	0	0	1	0	0	0	0	0	0	0	0	1	UA-KY	0
532	2024-11-10	1	1	0	1	1	0	0	1	1	0	0	0	1	0	0	0	1	UA-KY	0
533	2025-01-05	1	0	0	0	0	0	0	0	0	0	0	0	0	0	0	0	1	UA-KY	0
534	2024-11-27	1	1	0	1	0	0	0	0	0	0	0	0	0	0	0	0	0	N-A	0
535	2025-01-16	1	1	0	1	0	0	0	0	0	0	0	0	0	0	0	0	1	UA-KY	0
536	2023-11-12	1	0	0	0	0	0	0	0	0	0	0	0	0	0	0	0	1	UA-OD	0
537	2024-05-05	1	0	0	0	0	0	0	0	0	0	0	0	0	0	0	0	1	UA-KY	0
538	2022-08-06	1	1	1	0	0	0	0	0	0	0	0	0	0	0	0	0	1	UA-LV	1	2022-08-06
539	2024-08-29	0	0	0	0	0	0	0	0	0	0	0	0	0	0	0	0	0	N-A	0
540	2023-04-04	1	1	0	1	1	0	0	1	0	0	0	0	1	0	0	0	1	UA-KY	0
541	2024-07-31	1	0	0	0	0	0	0	0	0	0	0	0	0	0	0	0	1	UA-DP	0
542	2023-12-01	1	1	0	1	0	0	0	0	0	0	0	0	0	0	0	0	1	UA-KY	0
543	2023-11-27	1	1	1	0	0	0	0	0	0	0	0	0	0	0	0	0	1	UA-KY	0
544	2024-10-06	1	1	0	1	0	0	0	0	0	0	0	0	0	0	0	0	1	UA-LV	0
545	2024-03-12	1	1	0	1	0	0	0	0	0	0	0	0	0	0	0	0	1	UA-KY	0
546	2024-06-09	1	1	0	1	0	0	0	0	0	0	0	0	0	0	0	0	1	UA-IF	0
547	2023-09-15	0	0	0	0	0	0	0	0	0	0	0	0	0	0	0	0	0	N-A	0
548	2022-08-02	1	0	0	0	0	0	0	0	0	0	0	0	0	0	0	0	0	N-A	0
549	2022-08-07	1	0	0	0	0	0	0	0	0	0	0	0	0	0	0	0	1	UA-KH	1	2023-05-21
550	2023-06-16	1	1	0	1	0	1	0	0	0	1	0	0	0	0	0	0	0	N-A	0
551	2022-08-03	1	0	0	0	0	0	0	0	0	0	0	0	0	0	0	0	0	N-A	0
552	2022-10-29	1	0	0	0	0	0	0	0	0	0	0	0	0	0	0	0	0	N-A	0
553	2024-11-22	1	0	0	0	0	0	0	0	0	0	0	0	0	0	0	0	1	UA-CH	0
554	2023-09-06	1	1	1	0	0	0	0	0	0	0	0	0	0	0	0	0	1	UA-KO	0
555	2024-08-16	1	1	0	1	0	0	0	0	0	0	0	0	0	0	0	0	1	UA-LV	0
556	2022-08-04	1	0	0	0	0	0	0	0	0	0	0	0	0	0	0	0	0	N-A	0
557	2023-11-18	0	0	0	0	0	0	0	0	0	0	0	0	0	0	0	0	0	N-A	0
558	2023-06-16	1	0	0	0	0	0	0	0	0	0	0	0	0	0	0	0	0	N-A	0
559	2023-07-03	1	0	0	0	0	0	0	0	0	0	0	0	0	0	0	0	1	UA-KY	0
560	2024-05-05	1	1	0	1	1	0	0	0	0	0	0	0	0	0	0	1	1	UA-DP	0
561	2024-04-27	1	0	0	0	0	0	0	0	0	0	0	0	0	0	0	0	1	UA-KY	0
562	2023-09-04	1	1	0	1	0	0	0	1	0	0	0	0	0	0	0	0	0	N-A	0
563	2024-08-12	1	0	0	0	0	0	0	0	0	0	0	0	0	0	0	0	1	UA-KY	0
564	2024-12-02	1	1	0	1	0	0	0	0	0	0	0	0	0	0	0	0	1	UA-LV	0
565	2022-08-03	1	0	0	0	0	0	0	0	0	0	0	0	0	0	0	0	1	UA-KY	0
566	2024-10-25	1	1	0	1	0	0	0	0	0	0	0	0	0	0	0	0	1	UA-KY	0
567	2024-03-25	1	1	0	1	0	0	0	1	1	0	0	0	0	0	0	0	1	UA-KY	0
568	2022-08-03	1	1	0	1	0	0	0	0	0	0	0	0	0	0	0	0	1	UA-LV	0
569	2023-07-28	1	1	0	0	1	0	0	0	0	0	0	0	1	0	0	0	1	UA-TE	0
570	2025-01-09	1	1	0	1	0	0	0	0	0	0	0	0	0	0	0	0	1	UA-KY	0
571	2024-09-27	1	1	1	1	0	0	0	0	0	0	0	0	0	0	0	0	1	UA-IF	0
572	2024-05-07	1	0	0	0	0	0	0	0	0	0	0	0	0	0	0	0	0	N-A	0
573	2022-08-10	1	1	0	1	0	0	0	0	0	0	0	0	0	0	0	0	1	UA-KY	0
574	2024-12-15	1	0	0	0	0	0	0	0	0	0	0	0	0	0	0	0	1	UA-KY	0
575	2023-12-01	1	0	0	0	0	0	0	0	0	0	0	0	0	0	0	0	1	UA-DP	0
576	2024-03-16	1	1	1	0	0	0	0	0	0	0	0	0	0	0	0	0	1	UA-VI	0
577	2024-10-07	1	0	0	0	0	0	0	0	0	0	0	0	0	0	0	0	1	UA-KY	0
578	2024-10-24	1	0	0	0	0	0	0	0	0	0	0	0	0	0	0	0	0	N-A	0
579	2023-08-03	1	0	0	0	0	0	0	0	0	0	0	0	0	0	0	0	1	UA-KY	0
580	2023-11-11	1	1	0	1	0	0	0	0	0	0	0	0	0	0	0	0	1	UA-OD	0
581	2025-01-23	1	0	0	0	0	0	0	0	0	0	0	0	0	0	0	0	1	UA-KY	0
582	2024-12-24	1	1	0	1	0	0	0	0	0	0	0	0	0	0	0	0	1	UA-KY	0
583	2024-02-09	1	0	0	0	0	0	0	0	0	0	0	0	0	0	0	0	0	N-A	0
584	2024-05-05	1	1	0	1	0	0	0	0	0	0	0	0	0	0	0	0	1	UA-KH	0
585	2024-03-11	1	1	0	1	0	0	0	0	0	0	0	0	0	0	0	0	1	UA-KY	0
586	2023-07-20	1	1	0	1	0	0	0	0	0	0	0	0	0	0	0	0	1	UA-ZP	0
587	2024-05-05	1	0	0	0	0	0	0	0	0	0	0	0	0	0	0	0	1	UA-RI	0
588	2023-12-01	1	0	0	0	0	0	0	0	0	0	0	0	0	0	0	0	1	UA-KO	0
589	2023-08-13	1	0	0	0	0	0	0	0	0	0	0	0	0	0	0	0	0	N-A	0
590	2024-10-22	1	0	0	0	0	0	0	0	0	0	0	0	0	0	0	0	0	N-A	0
591	2022-08-03	1	0	0	0	0	0	0	0	0	0	0	0	0	0	0	0	1	UA-DP	0
592	2023-07-19	1	0	0	0	0	0	0	0	0	0	0	0	0	0	0	0	1	UA-IF	0
593	2022-08-03	1	0	0	0	0	0	0	0	0	0	0	0	0	0	0	0	1	UA-OD	0
594	2024-06-13	1	0	0	0	0	0	0	0	0	0	0	0	0	0	0	0	1	UA-KY	0
595	2022-08-02	1	0	0	0	0	0	0	0	0	0	0	0	0	0	0	0	0	N-A	0
596	2024-11-11	1	1	0	1	0	0	0	1	0	0	0	0	0	0	0	0	1	UA-KY	0
597	2024-06-27	1	1	1	1	0	0	0	0	0	0	0	0	0	0	0	0	1	UA-DP	0
598	2022-08-09	1	1	0	1	0	0	0	0	0	0	0	0	0	0	0	0	1	UA-KY	0
599	2024-05-05	1	0	0	0	0	0	0	0	0	0	0	0	0	0	0	0	0	N-A	0
600	2024-11-10	1	0	0	0	0	0	0	0	0	0	0	0	0	0	0	0	0	N-A	0
601	2024-05-05	1	1	1	1	0	0	0	0	0	0	0	0	0	0	0	0	1	UA-ZA	0
602	2023-04-28	1	1	0	1	0	0	0	0	0	0	0	0	0	0	0	0	1	UA-KH	0
603	2023-12-22	1	0	0	0	0	0	0	0	0	0	0	0	0	0	0	0	1	UA-TE	0
604	2022-08-17	1	1	1	0	0	0	0	0	0	0	0	0	0	0	0	0	1	UA-KY	1	2024-10-15
605	2023-11-28	1	0	0	0	0	0	0	0	0	0	0	0	0	0	0	0	0	N-A	0
606	2024-05-05	1	0	0	0	0	0	0	0	0	0	0	0	0	0	0	0	0	N-A	0
607	2024-03-07	1	1	1	0	0	0	0	0	0	0	0	0	0	0	0	0	1	UA-KY	0
608	2022-08-03	1	0	0	0	0	0	0	0	0	0	0	0	0	0	0	0	0	N-A	0
609	2022-08-04	1	0	0	0	0	0	0	0	0	0	0	0	0	0	0	0	0	N-A	0
610	2022-08-03	1	1	0	1	0	0	0	0	0	0	0	0	0	0	0	0	1	UA-LV	0
611	2024-05-15	1	1	0	1	0	0	0	1	0	0	0	0	0	0	0	0	1	UA-LV	0
612	2024-05-09	1	1	0	1	0	0	0	0	0	0	0	0	0	0	0	0	1	UA-KO	0
613	2024-04-09	1	0	0	0	0	0	0	0	0	0	0	0	0	0	0	0	1	UA-KY	0
614	2023-07-18	1	1	0	1	0	0	0	0	0	0	0	0	0	0	0	0	1	UA-KY	0
615	2022-08-03	1	0	0	0	0	0	0	0	0	0	0	0	0	0	0	0	1	UA-KY	0
616	2024-08-16	1	0	0	0	0	0	0	0	0	0	0	0	0	0	0	0	1	UA-TE	0
617	2022-08-03	1	0	0	0	0	0	0	0	0	0	0	0	0	0	0	0	0	N-A	0
618	2024-01-29	1	0	0	0	0	0	0	0	0	0	0	0	0	0	0	0	1	UA-KY	0
619	2024-09-16	1	1	0	1	0	0	0	0	0	0	0	0	0	0	0	0	1	UA-KY	0
620	2022-08-02	1	0	0	0	0	0	0	0	0	0	0	0	0	0	0	0	1	UA-KY	0
621	2024-04-05	1	0	0	0	0	0	0	0	0	0	0	0	0	0	0	0	0	N-A	0
622	2024-03-28	1	0	0	0	0	0	0	0	0	0	0	0	0	0	0	0	1	UA-KY	0
623	2022-08-02	1	0	0	0	0	0	0	0	0	0	0	0	0	0	0	0	1	UA-VI	0
624	2022-08-06	1	1	0	1	0	0	0	0	1	0	0	0	0	0	0	0	1	UA-VI	0
625	2024-03-21	1	0	0	0	0	0	0	0	0	0	0	0	0	0	0	0	1	UA-KY	0
626	2022-08-03	1	0	0	0	0	0	0	0	0	0	0	0	0	0	0	0	1	UA-DP	0
627	2024-05-05	1	1	0	1	0	0	0	0	0	0	0	0	0	0	0	0	1	UA-LV	0
628	2024-01-23	1	1	0	0	1	0	0	0	0	0	0	0	0	0	0	1	1	UA-KY	0
629	2023-11-28	1	1	0	1	0	0	0	0	0	0	0	0	0	0	0	0	1	UA-KY	0
630	2023-03-20	1	0	0	0	0	0	0	0	0	0	0	0	0	0	0	0	0	N-A	1	2023-03-20
631	2022-08-06	1	1	0	1	0	0	0	1	0	0	0	0	0	0	0	0	1	UA-LV	0
632	2024-02-01	1	1	0	1	0	0	0	0	0	0	0	0	0	0	0	0	0	N-A	0
633	2023-08-17	1	1	0	1	0	0	0	0	0	0	0	0	0	0	0	0	1	UA-KY	0
634	2023-12-01	1	1	0	1	0	0	0	0	0	0	0	0	0	0	0	0	1	UA-LV	0
635	2022-08-06	1	0	0	0	0	0	0	0	0	0	0	0	0	0	0	0	1	UA-KY	0
636	2023-11-21	0	0	0	0	0	0	0	0	0	0	0	0	0	0	0	0	0	N-A	0
637	2024-12-01	1	0	0	0	0	0	0	0	0	0	0	0	0	0	0	0	0	N-A	0
638	2022-08-03	1	1	0	1	0	0	0	0	0	0	0	0	0	0	0	0	0	N-A	0
639	2024-05-05	1	0	0	0	0	0	0	0	0	0	0	0	0	0	0	0	0	N-A	0
640	2024-12-01	1	0	0	0	0	0	0	0	0	0	0	0	0	0	0	0	1	UA-KH	0
641	2024-02-05	1	1	0	1	0	0	0	0	0	0	0	0	0	0	0	0	1	UA-CN	0
642	2022-08-03	1	0	0	0	0	0	0	0	0	0	0	0	0	0	0	0	1	UA-KY	0
643	2024-09-18	0	0	0	0	0	0	0	0	0	0	0	0	0	0	0	0	0	N-A	0
644	2024-02-13	1	0	0	0	0	0	0	0	0	0	0	0	0	0	0	0	1	UA-KY	0
645	2022-08-02	1	0	0	0	0	0	0	0	0	0	0	0	0	0	0	0	1	UA-KM	0
646	2023-12-05	1	1	0	1	0	0	0	0	0	0	0	0	0	0	0	0	1	UA-KY	0
647	2022-08-03	1	0	0	0	0	0	0	0	0	0	0	0	0	0	0	0	0	N-A	0
648	2024-12-13	1	1	0	1	0	0	0	0	0	0	0	0	0	0	0	0	1	UA-OD	0
649	2025-01-05	1	0	0	0	0	0	0	0	0	0	0	0	0	0	0	0	1	UA-OD	0
650	2025-01-19	1	0	0	0	0	0	0	0	0	0	0	0	0	0	0	0	1	UA-LV	0
651	2022-08-02	1	0	0	0	0	0	0	0	0	0	0	0	0	0	0	0	0	N-A	0
652	2024-11-24	1	1	0	1	0	0	0	0	0	0	0	0	0	0	0	0	0	N-A	0
653	2023-07-14	1	0	0	0	0	0	0	0	0	0	0	0	0	0	0	0	1	UA-KO	0
654	2024-02-08	1	1	0	1	0	0	0	1	0	0	0	0	0	0	0	0	1	UA-KY	0
655	2023-12-06	1	0	0	0	0	0	0	0	0	0	0	0	0	0	0	0	1	UA-LV	0
656	2023-12-20	1	1	0	1	0	0	0	0	0	0	0	0	0	0	0	0	1	UA-CH	0
657	2024-11-12	1	0	0	0	0	0	0	0	0	0	0	0	0	0	0	0	1	UA-KY	0
658	2022-08-21	1	0	0	0	0	0	0	0	0	0	0	0	0	0	0	0	1	UA-LV	1	2024-06-20
659	2023-09-24	0	0	0	0	0	0	0	0	0	0	0	0	0	0	0	0	0	N-A	0
660	2025-01-06	1	1	0	1	0	0	0	0	0	0	0	0	0	0	0	0	1	UA-KY	0
661	2024-05-16	1	1	1	1	1	0	0	0	0	0	0	0	1	0	0	0	1	UA-KY	0
662	2022-08-02	1	0	0	0	0	0	0	0	0	0	0	0	0	0	0	0	0	N-A	0
663	2023-12-02	1	1	0	1	0	0	0	1	0	0	0	0	0	0	0	0	1	UA-DP	0
664	2024-03-03	1	0	0	0	0	0	0	0	0	0	0	0	0	0	0	0	1	UA-KY	0
665	2024-08-19	1	1	1	1	0	0	0	0	0	0	0	0	0	0	0	0	1	UA-PO	0
666	2022-08-06	1	0	0	0	0	0	0	0	0	0	0	0	0	0	0	0	0	N-A	0
667	2022-08-03	1	1	0	1	0	0	0	1	0	0	0	0	0	0	0	0	1	UA-KY	0
668	2025-01-18	1	1	0	1	0	0	0	0	0	0	0	0	0	0	0	0	1	UA-KY	0
669	2023-07-01	1	0	0	0	0	0	0	0	0	0	0	0	0	0	0	0	1	UA-CH	0
670	2022-08-03	1	1	0	1	0	0	0	0	0	0	0	0	0	0	0	0	1	UA-KY	0
671	2024-03-19	1	0	0	0	0	0	0	0	0	0	0	0	0	0	0	0	1	UA-KY	0
672	2024-03-30	0	0	0	0	0	0	0	0	0	0	0	0	0	0	0	0	0	N-A	0
673	2024-12-11	1	1	0	1	0	0	0	0	0	0	0	0	0	0	0	0	1	UA-KY	0
674	2022-08-03	1	1	0	1	0	0	0	0	0	0	0	0	0	0	0	0	1	UA-IF	0
675	2024-03-03	1	1	0	1	0	0	0	0	0	0	0	0	0	0	0	0	1	UA-DP	0
676	2022-08-05	1	0	0	0	0	0	0	0	0	0	0	0	0	0	0	0	0	N-A	0
677	2023-03-13	1	0	0	0	0	0	0	0	0	0	0	0	0	0	0	0	0	N-A	0
678	2024-02-11	1	1	0	1	0	0	0	0	1	0	0	0	0	0	0	0	0	N-A	0
679	2023-11-21	0	0	0	0	0	0	0	0	0	0	0	0	0	0	0	0	0	N-A	0
680	2023-06-08	1	0	0	0	0	0	0	0	0	0	0	0	0	0	0	0	0	N-A	0
681	2022-09-13	1	1	1	0	0	0	0	0	0	0	0	0	0	0	0	0	1	UA-PO	1	2022-09-13
682	2023-09-10	0	0	0	0	0	0	0	0	0	0	0	0	0	0	0	0	0	N-A	0
683	2024-06-07	1	1	0	1	0	0	0	0	0	0	0	0	0	0	0	0	1	UA-LV	0
684	2024-05-05	1	1	0	1	0	0	0	1	0	0	0	0	0	0	0	0	1	UA-ZP	0
685	2023-11-27	1	1	1	0	0	0	0	0	0	0	0	0	0	0	0	0	1	UA-LV	0
686	2022-08-02	1	0	0	0	0	0	0	0	0	0	0	0	0	0	0	0	1	UA-KI	0
687	2024-08-13	1	0	0	0	0	0	0	0	0	0	0	0	0	0	0	0	1	UA-KY	0
688	2022-08-03	1	0	0	0	0	0	0	0	0	0	0	0	0	0	0	0	1	UA-KY	0
689	2023-08-01	1	0	0	0	0	0	0	0	0	0	0	0	0	0	0	0	1	UA-KY	0
690	2022-08-03	1	1	0	1	0	0	0	0	0	0	0	0	0	0	0	0	1	UA-DP	0
691	2023-04-10	1	0	0	0	0	0	0	0	0	0	0	0	0	0	0	0	0	N-A	0
692	2022-08-02	1	0	0	0	0	0	0	0	0	0	0	0	0	0	0	0	0	N-A	0
693	2024-12-17	1	0	0	0	0	0	0	0	0	0	0	0	0	0	0	0	1	UA-KY	0
694	2024-05-23	1	1	0	1	0	0	0	0	0	0	0	0	0	0	0	0	1	UA-KO	0
695	2024-03-06	1	1	0	1	0	0	0	0	0	0	0	0	0	0	0	0	1	UA-KO	0
696	2024-08-28	0	0	0	0	0	0	0	0	0	0	0	0	0	0	0	0	0	N-A	0
697	2022-08-02	1	1	0	1	0	0	0	0	0	0	0	0	0	0	0	0	1	UA-KY	0
698	2024-12-28	1	1	0	1	0	0	0	0	0	0	0	0	0	0	0	0	1	UA-KY	0
699	2025-01-21	1	0	0	0	0	0	0	0	0	0	0	0	0	0	0	0	1	UA-KY	0
700	2024-06-24	1	1	0	1	1	0	0	0	0	0	0	0	0	0	0	1	1	UA-KY	0
701	2023-06-20	1	1	0	1	0	1	0	0	1	1	0	0	0	0	0	0	1	UA-KO	0
702	2023-11-27	1	1	1	0	0	0	0	0	0	0	0	0	0	0	0	0	0	N-A	0
703	2024-05-23	1	0	0	0	0	0	0	0	0	0	0	0	0	0	0	0	0	N-A	0
704	2023-08-22	1	1	0	1	0	0	0	0	0	0	0	0	0	0	0	0	1	UA-LV	0
705	2022-08-09	1	1	0	1	0	0	0	0	0	0	0	0	0	0	0	0	1	UA-KY	0
706	2024-04-11	1	1	1	0	0	0	0	0	0	0	0	0	0	0	0	0	1	UA-KY	0
707	2024-05-05	1	1	1	1	0	0	0	0	0	0	0	0	0	0	0	0	1	UA-KO	0
708	2024-09-23	1	0	0	0	0	0	0	0	0	0	0	0	0	0	0	0	1	UA-KY	0
709	2022-08-03	1	0	0	0	0	0	0	0	0	0	0	0	0	0	0	0	0	N-A	0
710	2022-09-30	1	1	0	1	0	0	0	0	0	0	0	0	0	0	0	0	1	UA-DP	1	2022-09-30
711	2022-08-04	1	0	0	0	0	0	0	0	0	0	0	0	0	0	0	0	1	UA-OD	0
712	2024-02-29	1	0	0	0	0	0	0	0	0	0	0	0	0	0	0	0	1	UA-KY	0
713	2023-04-20	1	1	0	1	0	0	0	0	0	0	0	0	0	0	0	0	1	UA-PO	0
714	2024-05-28	1	1	0	1	0	0	0	0	0	0	0	0	0	0	0	0	1	UA-DP	0
715	2024-01-14	1	0	0	0	0	0	0	0	0	0	0	0	0	0	0	0	1	UA-RI	0
716	2024-11-05	1	0	0	0	0	0	0	0	0	0	0	0	0	0	0	0	1	UA-KY	0
717	2022-09-23	1	1	0	1	0	0	0	0	0	0	0	0	0	0	0	0	0	N-A	0
718	2022-11-30	1	0	0	0	0	0	0	0	0	0	0	0	0	0	0	0	1	UA-CG	1	2024-03-04
719	2023-12-18	1	1	0	1	0	0	0	0	0	0	0	0	0	0	0	0	1	UA-VI	0
720	2022-08-03	1	0	0	0	0	0	0	0	0	0	0	0	0	0	0	0	1	UA-KY	0
721	2023-07-15	1	1	0	0	1	0	0	0	0	0	0	0	0	1	0	0	1	UA-KO	0
722	2024-01-12	1	1	1	1	0	0	0	0	0	0	0	0	0	0	0	0	1	UA-LV	0
723	2022-08-02	1	1	0	1	0	0	0	0	0	0	0	0	0	0	0	0	0	N-A	0
724	2024-01-14	1	1	0	1	0	0	0	0	0	0	0	0	0	0	0	0	1	UA-DP	0
725	2024-12-22	1	1	0	1	0	0	0	0	0	0	0	0	0	0	0	0	1	UA-KM	0
726	2024-01-06	1	1	0	1	0	0	0	0	0	0	0	0	0	0	0	0	1	UA-IF	0
727	2024-05-05	1	0	0	0	0	0	0	0	0	0	0	0	0	0	0	0	1	UA-ZA	0
728	2024-05-05	1	0	0	0	0	0	0	0	0	0	0	0	0	0	0	0	1	UA-KY	0
729	2023-08-09	0	0	0	0	0	0	0	0	0	0	0	0	0	0	0	0	0	N-A	0
730	2022-12-26	1	1	1	1	1	0	0	0	0	0	0	0	0	1	0	0	1	UA-CG	1	2022-12-26
731	2024-05-08	1	1	0	1	0	0	0	0	0	0	0	0	0	0	0	0	1	UA-KY	0
732	2023-08-30	1	1	0	1	0	0	0	1	0	0	0	0	0	0	0	0	1	UA-DP	0
733	2024-07-01	1	1	1	1	0	0	0	0	0	0	0	0	0	0	0	0	1	UA-KY	0
734	2023-05-15	1	0	0	0	0	0	0	0	0	0	0	0	0	0	0	0	0	N-A	0
735	2023-07-15	1	1	0	1	1	0	0	1	1	0	0	0	0	0	0	1	1	UA-KY	0
736	2023-01-23	1	1	0	1	0	0	0	0	0	0	0	0	0	0	0	0	1	UA-KY	0
737	2024-09-22	1	1	1	0	0	0	0	0	0	0	0	0	0	0	0	0	1	UA-KY	0
738	2024-02-28	1	0	0	0	0	0	0	0	0	0	0	0	0	0	0	0	1	UA-VO	0
739	2023-03-12	1	1	0	1	0	0	0	1	0	0	0	0	0	0	0	0	1	UA-VI	1	2023-04-05
740	2024-09-21	1	1	0	1	0	0	0	0	0	0	0	0	0	0	0	0	1	UA-KY	0
741	2022-08-04	1	0	0	0	0	0	0	0	0	0	0	0	0	0	0	0	0	N-A	0
742	2024-10-16	1	0	0	0	0	0	0	0	0	0	0	0	0	0	0	0	1	UA-KY	0
743	2024-08-05	1	1	0	1	0	0	0	0	0	0	0	0	0	0	0	0	1	UA-LV	0
744	2024-03-24	1	1	0	1	1	0	0	1	0	0	0	0	0	0	0	1	1	UA-KO	0
745	2024-11-13	1	1	1	1	0	0	0	0	0	0	0	0	0	0	0	0	1	UA-KY	0
746	2023-09-28	0	0	0	0	0	0	0	0	0	0	0	0	0	0	0	0	0	N-A	0
747	2024-03-04	1	0	0	0	0	0	0	0	0	0	0	0	0	0	0	0	1	UA-KY	0
748	2024-10-23	1	1	0	1	0	0	0	0	0	0	0	0	0	0	0	0	1	UA-KY	0
749	2023-08-14	1	1	1	1	0	0	0	0	0	0	0	0	0	0	0	0	1	UA-KY	0
750	2024-05-31	1	1	0	1	0	0	0	0	0	0	0	0	0	0	0	0	0	N-A	0
751	2024-08-25	1	0	0	0	0	0	0	0	0	0	0	0	0	0	0	0	1	UA-VI	0
752	2024-06-19	1	1	1	1	0	0	0	0	0	0	0	0	0	0	0	0	1	UA-KY	0
753	2024-04-18	1	0	0	0	0	0	0	0	0	0	0	0	0	0	0	0	1	UA-KY	0
754	2024-09-09	0	0	0	0	0	0	0	0	0	0	0	0	0	0	0	0	0	N-A	0
755	2022-08-03	1	0	0	0	0	0	0	0	0	0	0	0	0	0	0	0	1	UA-KY	0
756	2023-03-14	1	1	1	1	1	0	0	0	0	0	0	0	1	0	0	0	0	N-A	1	2023-03-14
757	2023-08-22	1	0	0	0	0	0	0	0	0	0	0	0	0	0	0	0	1	UA-KO	0
758	2022-08-04	1	1	0	1	0	0	0	1	0	0	0	0	0	0	0	0	1	UA-KY	0
759	2024-09-22	1	1	1	0	0	0	0	0	0	0	0	0	0	0	0	0	1	UA-KY	0
760	2023-07-08	1	0	0	0	0	0	0	0	0	0	0	0	0	0	0	0	1	UA-KY	0
761	2023-08-07	1	1	1	1	1	0	0	0	0	0	1	0	0	0	0	0	1	UA-KS	0
762	2024-07-02	1	0	0	0	0	0	0	0	0	0	0	0	0	0	0	0	1	UA-KY	0
763	2023-01-23	1	1	1	1	0	0	0	0	0	0	0	0	0	0	0	0	1	UA-KY	0
764	2023-05-15	1	0	0	0	0	0	0	0	0	0	0	0	0	0	0	0	1	UA-TE	0
765	2023-06-03	1	1	0	1	0	1	0	1	0	1	0	0	0	0	0	0	0	N-A	0
766	2024-10-21	1	0	0	0	0	0	0	0	0	0	0	0	0	0	0	0	1	UA-KY	0
767	2022-08-02	1	0	0	0	0	0	0	0	0	0	0	0	0	0	0	0	0	N-A	0
768	2024-05-05	1	1	0	1	0	0	0	0	0	0	0	0	0	0	0	0	1	UA-KY	0
769	2024-05-10	1	0	0	0	0	0	0	0	0	0	0	0	0	0	0	0	0	N-A	0
770	2024-02-04	1	1	0	1	1	0	0	0	0	0	0	0	0	1	0	0	1	UA-LV	0
771	2025-01-07	1	1	0	1	0	0	0	0	0	0	0	0	0	0	0	0	1	UA-KY	0
772	2024-07-03	1	1	1	0	0	0	0	0	0	0	0	0	0	0	0	0	0	N-A	0
773	2023-09-11	0	0	0	0	0	0	0	0	0	0	0	0	0	0	0	0	0	N-A	0
774	2023-09-12	0	0	0	0	0	0	0	0	0	0	0	0	0	0	0	0	0	N-A	0
775	2024-03-06	1	0	0	0	0	0	0	0	0	0	0	0	0	0	0	0	1	UA-IF	0
776	2024-08-07	1	0	0	0	0	0	0	0	0	0	0	0	0	0	0	0	0	N-A	0
777	2023-11-28	1	1	1	1	0	0	0	0	0	0	0	0	0	0	0	0	1	UA-CN	0
778	2024-11-12	1	0	0	0	0	0	0	0	0	0	0	0	0	0	0	0	1	UA-KM	0
779	2025-01-03	1	1	0	1	0	0	0	0	0	0	0	0	0	0	0	0	1	UA-KY	0
780	2024-05-06	1	1	1	1	1	0	0	0	0	0	0	0	0	0	0	1	0	N-A	0
781	2024-12-01	1	1	0	1	0	0	0	0	0	0	0	0	0	0	0	0	1	UA-LV	0
782	2024-11-14	1	1	0	1	0	0	0	0	0	0	0	0	0	0	0	0	1	UA-IF	0
783	2022-12-01	1	1	0	1	0	0	0	0	0	0	0	0	0	0	0	0	1	UA-CG	0
784	2024-02-27	1	0	0	0	0	0	0	0	0	0	0	0	0	0	0	0	1	UA-OD	0
785	2024-05-02	1	1	0	1	0	0	0	0	0	0	0	0	0	0	0	0	1	UA-KY	0
786	2023-03-15	1	1	0	1	1	0	0	0	0	0	0	0	0	0	0	1	1	UA-RI	1	2023-05-20
787	2024-12-27	1	1	0	1	0	0	0	0	0	0	0	0	0	0	0	0	1	UA-KY	0
788	2024-10-05	1	1	0	1	0	0	0	0	0	0	0	0	0	0	0	0	1	UA-KY	0
789	2024-05-05	1	1	0	1	0	0	0	0	0	0	0	0	0	0	0	0	1	UA-KY	0
790	2022-09-29	1	1	1	1	0	0	0	0	0	0	0	0	0	0	0	0	1	UA-KY	0
791	2024-07-13	1	1	1	1	0	0	0	0	0	0	0	0	0	0	0	0	1	UA-KY	0
792	2024-03-02	1	1	1	1	0	0	0	0	0	0	0	0	0	0	0	0	1	UA-KY	0
793	2024-04-03	1	0	0	0	0	0	0	0	0	0	0	0	0	0	0	0	1	UA-KY	0
794	2022-08-03	1	1	1	1	0	0	0	0	0	0	0	0	0	0	0	0	1	UA-KY	0
795	2022-08-03	1	0	0	0	0	0	0	0	0	0	0	0	0	0	0	0	0	N-A	0
796	2023-08-06	1	0	0	0	0	0	0	0	0	0	0	0	0	0	0	0	1	UA-KY	0
797	2024-09-27	1	0	0	0	0	0	0	0	0	0	0	0	0	0	0	0	1	UA-LV	0
798	2024-06-01	1	1	1	0	0	0	0	0	0	0	0	0	0	0	0	0	1	UA-PO	0
799	2022-08-03	1	0	0	0	0	0	0	0	0	0	0	0	0	0	0	0	0	N-A	0
800	2024-07-30	1	1	0	1	0	0	0	0	0	0	0	0	0	0	0	0	1	UA-KY	0
801	2022-08-02	1	1	0	1	0	0	0	0	0	0	0	0	0	0	0	0	1	UA-KY	0
802	2023-12-01	1	0	0	0	0	0	0	0	0	0	0	0	0	0	0	0	1	UA-KH	0
803	2023-04-05	1	1	0	1	0	0	0	0	0	0	0	0	0	0	0	0	1	UA-ZA	1	2023-04-29
804	2024-01-15	1	1	0	1	0	0	0	1	0	0	0	0	0	0	0	0	1	UA-KY	0
805	2022-08-03	1	0	0	0	0	0	0	0	0	0	0	0	0	0	0	0	0	N-A	0
806	2022-08-03	1	1	0	1	1	0	0	0	0	0	0	0	1	0	0	0	0	N-A	0
807	2024-10-22	1	1	1	1	0	0	0	0	0	0	0	0	0	0	0	0	1	UA-KY	0
808	2024-08-15	1	0	0	0	0	0	0	0	0	0	0	0	0	0	0	0	1	UA-KO	0
809	2024-09-30	1	1	1	1	1	0	0	0	0	0	0	0	1	0	0	0	1	UA-KO	0
810	2024-10-12	1	1	0	1	0	0	0	1	0	0	0	0	0	0	0	0	1	UA-KY	0
811	2022-08-03	1	0	0	0	0	0	0	0	0	0	0	0	0	0	0	0	0	N-A	0
812	2023-03-27	1	1	1	0	0	0	0	0	0	0	0	0	0	0	0	0	1	UA-PO	0
813	2022-08-03	1	1	0	1	0	0	0	0	0	0	0	0	0	0	0	0	1	UA-KY	0
814	2024-04-12	1	1	0	1	0	0	0	0	0	0	0	0	0	0	0	0	1	UA-KY	0
815	2022-08-03	1	1	1	1	0	0	0	0	0	0	0	0	0	0	0	0	1	UA-RI	0
816	2024-02-08	1	1	0	1	0	1	1	1	1	1	0	0	0	0	0	0	1	UA-KY	0
817	2024-01-04	1	1	0	1	0	0	0	1	0	0	0	0	0	0	0	0	1	UA-KY	0
818	2024-05-09	1	1	0	1	0	0	0	0	0	0	0	0	0	0	0	0	1	UA-LV	0
819	2022-08-05	1	0	0	0	0	0	0	0	0	0	0	0	0	0	0	0	0	N-A	0
820	2023-09-07	1	1	0	1	0	0	0	1	0	0	0	0	0	0	0	0	1	UA-KY	0
821	2024-05-05	1	0	0	0	0	0	0	0	0	0	0	0	0	0	0	0	1	UA-KH	0
822	2024-03-12	1	1	0	1	0	0	0	1	0	0	0	0	0	0	0	0	0	N-A	0
823	2022-08-06	1	0	0	0	0	0	0	0	0	0	0	0	0	0	0	0	1	UA-KH	0
824	2024-03-23	1	0	0	0	0	0	0	0	0	0	0	0	0	0	0	0	0	N-A	0
825	2023-11-22	0	0	0	0	0	0	0	0	0	0	0	0	0	0	0	0	0	N-A	0
826	2022-08-02	1	0	0	0	0	0	0	0	0	0	0	0	0	0	0	0	0	N-A	0
827	2024-12-09	1	0	0	0	0	0	0	0	0	0	0	0	0	0	0	0	1	UA-KH	0
828	2024-06-10	1	0	0	0	0	0	0	0	0	0	0	0	0	0	0	0	1	UA-CG	0
829	2023-09-04	1	1	1	1	0	0	0	0	0	0	0	0	0	0	0	0	1	UA-KY	0
830	2022-08-02	1	1	0	1	0	0	0	0	0	0	0	0	0	0	0	0	1	UA-KY	0
831	2022-08-03	1	0	0	0	0	0	0	0	0	0	0	0	0	0	0	0	0	N-A	0
832	2024-08-26	0	0	0	0	0	0	0	0	0	0	0	0	0	0	0	0	0	N-A	0
833	2023-01-16	1	0	0	0	0	0	0	0	0	0	0	0	0	0	0	0	0	N-A	0
834	2022-08-09	1	0	0	0	0	0	0	0	0	0	0	0	0	0	0	0	1	UA-KY	0
835	2022-08-03	1	1	1	1	0	0	0	0	0	0	0	0	0	0	0	0	0	N-A	0
836	2022-08-23	1	0	0	0	0	0	0	0	0	0	0	0	0	0	0	0	0	N-A	0
837	2024-05-15	1	0	0	0	0	0	0	0	0	0	0	0	0	0	0	0	0	N-A	0
838	2024-08-08	1	1	1	0	0	0	0	0	0	0	0	0	0	0	0	0	1	UA-KH	0
839	2024-10-26	1	1	0	1	0	0	0	0	0	0	0	0	0	0	0	0	1	UA-KY	0
840	2024-07-30	1	1	0	1	1	0	0	0	0	0	0	0	0	0	0	1	1	UA-KY	0
841	2024-10-11	1	0	0	0	0	0	0	0	0	0	0	0	0	0	0	0	1	UA-RI	0
842	2024-07-05	1	0	0	0	0	0	0	0	0	0	0	0	0	0	0	0	0	N-A	0
843	2024-05-02	1	0	0	0	0	0	0	0	0	0	0	0	0	0	0	0	1	UA-KY	0
844	2022-08-03	1	1	1	0	0	0	0	0	0	0	0	0	0	0	0	0	1	UA-KY	0
845	2022-08-03	1	0	0	0	0	0	0	0	0	0	0	0	0	0	0	0	0	N-A	0
846	2022-08-02	1	0	0	0	0	0	0	0	0	0	0	0	0	0	0	0	0	N-A	0
847	2024-09-08	0	0	0	0	0	0	0	0	0	0	0	0	0	0	0	0	0	N-A	0
848	2024-12-07	1	1	1	1	0	0	0	0	0	0	0	0	0	0	0	0	1	UA-KY	0
849	2024-05-10	1	1	1	0	0	0	0	0	0	0	0	0	0	0	0	0	1	UA-IF	0
850	2022-08-03	1	0	0	0	0	0	0	0	0	0	0	0	0	0	0	0	0	N-A	0
851	2023-12-01	1	0	0	0	0	0	0	0	0	0	0	0	0	0	0	0	1	UA-KY	0
852	2022-08-22	1	1	0	1	0	0	0	0	0	0	0	0	0	0	0	0	1	UA-KY	0
853	2024-05-05	1	1	1	1	0	0	0	0	0	0	0	0	0	0	0	0	1	UA-KH	0
854	2023-12-01	1	0	0	0	0	0	0	0	0	0	0	0	0	0	0	0	0	N-A	0
855	2024-05-05	1	0	0	0	0	0	0	0	0	0	0	0	0	0	0	0	0	N-A	0
856	2025-01-21	1	1	1	1	0	0	0	0	0	0	0	0	0	0	0	0	1	UA-KY	0
857	2023-04-11	1	0	0	0	0	0	0	0	0	0	0	0	0	0	0	0	1	UA-LV	0
858	2024-05-07	1	1	0	0	1	0	0	0	0	0	0	0	1	0	0	0	1	UA-KY	0
859	2023-12-04	0	0	0	0	0	0	0	0	0	0	0	0	0	0	0	0	0	N-A	0
860	2024-05-08	1	1	0	1	0	0	0	0	0	0	0	0	0	0	0	0	0	N-A	0
861	2024-10-02	1	0	0	0	0	0	0	0	0	0	0	0	0	0	0	0	1	UA-KY	0
862	2025-01-01	1	1	1	1	0	0	0	0	0	0	0	0	0	0	0	0	1	UA-KY	0
863	2024-07-06	1	0	0	0	0	0	0	0	0	0	0	0	0	0	0	0	1	UA-LV	0
864	2024-07-22	1	0	0	0	0	0	0	0	0	0	0	0	0	0	0	0	1	UA-ZH	0
865	2024-04-26	1	1	0	1	0	0	0	0	0	0	0	0	0	0	0	0	1	UA-KY	0
866	2024-12-27	1	0	0	0	0	0	0	0	0	0	0	0	0	0	0	0	1	UA-DP	0
867	2023-07-14	1	1	0	1	0	0	0	1	0	0	0	0	0	0	0	0	1	UA-KY	0
868	2024-09-19	1	1	0	1	0	0	0	0	0	0	0	0	0	0	0	0	1	UA-MY	0
869	2023-12-01	1	0	0	0	0	0	0	0	0	0	0	0	0	0	0	0	1	UA-KY	0
870	2022-10-08	1	1	1	1	1	0	0	0	0	0	0	0	1	0	0	1	1	UA-DP	0
871	2024-06-12	1	0	0	0	0	0	0	0	0	0	0	0	0	0	0	0	0	N-A	0
872	2022-08-03	1	0	0	0	0	0	0	0	0	0	0	0	0	0	0	0	0	N-A	0
873	2024-07-18	1	0	0	0	0	0	0	0	0	0	0	0	0	0	0	0	1	UA-VI	0
874	2024-04-03	1	0	0	0	0	0	0	0	0	0	0	0	0	0	0	0	1	UA-LV	0
875	2023-07-21	1	1	1	1	0	0	0	0	0	0	0	0	0	0	0	0	1	UA-MY	0
876	2024-04-25	1	1	0	1	0	0	0	0	0	0	0	0	0	0	0	0	1	UA-DP	0
877	2024-06-24	1	1	0	1	0	0	0	0	0	0	0	0	0	0	0	0	1	UA-KY	0
878	2023-06-11	1	0	0	0	0	0	0	0	0	0	0	0	0	0	0	0	0	N-A	0
879	2024-04-18	1	0	0	0	0	0	0	0	0	0	0	0	0	0	0	0	1	UA-CH	0
880	2022-08-09	1	0	0	0	0	0	0	0	0	0	0	0	0	0	0	0	1	UA-KY	0
881	2022-08-03	1	1	0	1	0	0	0	0	0	0	0	0	0	0	0	0	0	N-A	0
882	2023-12-13	1	1	1	0	0	0	0	0	0	0	0	0	0	0	0	0	1	UA-KY	0
883	2023-11-21	1	1	0	0	1	0	0	0	0	0	0	0	1	0	0	0	1	UA-KY	0
884	2024-09-15	0	0	0	0	0	0	0	0	0	0	0	0	0	0	0	0	0	N-A	0
885	2023-12-01	1	0	0	0	0	0	0	0	0	0	0	0	0	0	0	0	1	UA-RI	0
886	2022-08-02	1	0	0	0	0	0	0	0	0	0	0	0	0	0	0	0	1	UA-KY	0
887	2024-07-06	1	0	0	0	0	0	0	0	0	0	0	0	0	0	0	0	1	UA-KY	0
888	2024-10-22	1	0	0	0	0	0	0	0	0	0	0	0	0	0	0	0	1	UA-KY	0
889	2024-08-19	1	1	0	1	0	0	0	0	0	0	0	0	0	0	0	0	1	UA-OD	0
890	2023-07-05	1	0	0	0	0	0	0	0	0	0	0	0	0	0	0	0	0	N-A	0
891	2025-01-20	1	0	0	0	0	0	0	0	0	0	0	0	0	0	0	0	1	UA-VI	0
892	2022-10-28	1	1	0	1	0	0	0	0	1	0	0	0	0	0	0	0	0	N-A	0
893	2023-11-09	1	1	0	1	0	0	0	0	0	0	0	0	0	0	0	0	1	UA-SU	0
894	2022-08-09	1	0	0	0	0	0	0	0	0	0	0	0	0	0	0	0	0	N-A	0
895	2023-09-20	1	0	0	0	0	0	0	0	0	0	0	0	0	0	0	0	0	N-A	0
896	2022-08-07	1	0	0	0	0	0	0	0	0	0	0	0	0	0	0	0	1	UA-LV	0
897	2022-08-03	1	1	0	0	1	0	0	0	0	0	0	0	1	0	0	0	0	N-A	0
898	2023-04-13	1	0	0	0	0	0	0	0	0	0	0	0	0	0	0	0	1	UA-DP	1	2023-08-22
899	2023-04-16	1	1	0	1	0	0	0	1	0	0	0	0	0	0	0	0	1	UA-ZP	0
900	2023-12-05	1	1	0	1	0	0	0	0	0	0	0	0	0	0	0	0	1	UA-KO	0
901	2022-08-05	1	0	0	0	0	0	0	0	0	0	0	0	0	0	0	0	0	N-A	0
902	2024-10-05	1	1	1	0	0	0	0	0	0	0	0	0	0	0	0	0	1	UA-KY	0
903	2022-11-10	1	1	0	1	0	0	0	0	0	0	0	0	0	0	0	0	0	N-A	0
904	2023-12-23	1	1	0	1	0	0	0	1	0	0	0	0	0	0	0	0	1	UA-KY	0
905	2023-12-01	1	0	0	0	0	0	0	0	0	0	0	0	0	0	0	0	1	UA-VI	0
906	2022-08-03	1	1	1	0	0	0	0	0	0	0	0	0	0	0	0	0	1	UA-SU	0
907	2024-09-30	1	1	0	1	0	0	0	0	0	0	0	0	0	0	0	0	1	UA-LV	0
908	2024-06-09	1	1	0	1	0	0	0	0	0	0	0	0	0	0	0	0	1	UA-CG	0
909	2025-01-02	1	0	0	0	0	0	0	0	0	0	0	0	0	0	0	0	1	UA-KY	0
910	2024-05-05	1	1	0	1	0	0	0	0	0	0	0	0	0	0	0	0	1	UA-CN	0
911	2023-08-14	1	1	1	0	0	0	0	0	0	0	0	0	0	0	0	0	1	UA-KY	0
912	2023-09-17	0	0	0	0	0	0	0	0	0	0	0	0	0	0	0	0	0	N-A	0
913	2024-03-01	1	0	0	0	0	0	0	0	0	0	0	0	0	0	0	0	1	UA-KO	0
914	2023-04-16	1	1	1	0	0	0	0	0	0	0	0	0	0	0	0	0	0	N-A	1	2023-04-16
915	2023-04-23	1	0	0	0	0	0	0	0	0	0	0	0	0	0	0	0	1	UA-KH	0
916	2023-07-15	1	0	0	0	0	0	0	0	0	0	0	0	0	0	0	0	1	UA-DP	0
917	2023-12-01	1	1	0	0	1	0	0	0	0	0	0	0	1	0	0	0	1	UA-IF	0
918	2023-04-27	1	1	0	1	1	0	0	1	1	0	0	0	0	0	0	1	1	UA-KY	0
919	2024-01-27	1	1	1	1	0	0	0	0	0	0	0	0	0	0	0	0	1	UA-KY	0
920	2024-12-23	1	1	0	1	0	0	0	0	0	0	0	0	0	0	0	0	1	UA-KH	0
921	2024-05-21	1	0	0	0	0	0	0	0	0	0	0	0	0	0	0	0	0	N-A	0
922	2024-10-05	1	1	0	1	1	0	0	0	0	0	0	0	1	0	0	0	1	UA-VI	0
923	2022-08-03	1	0	0	0	0	0	0	0	0	0	0	0	0	0	0	0	0	N-A	0
924	2024-05-09	1	0	0	0	0	0	0	0	0	0	0	0	0	0	0	0	1	UA-OD	0
925	2022-08-10	1	1	0	1	0	0	0	0	0	0	0	0	0	0	0	0	1	UA-VI	0
926	2023-06-22	1	0	0	0	0	0	0	0	0	0	0	0	0	0	0	0	1	UA-KO	0
927	2024-05-19	1	0	0	0	0	0	0	0	0	0	0	0	0	0	0	0	0	N-A	0
928	2023-04-07	1	1	0	1	0	0	0	1	1	0	0	0	0	0	0	0	1	UA-KY	0
929	2024-05-27	1	1	0	1	0	0	0	0	0	0	0	0	0	0	0	0	1	UA-KY	0
930	2023-04-16	1	1	0	1	1	0	0	0	0	0	0	0	1	0	0	0	1	UA-KY	1	2023-04-19
931	2024-05-06	1	1	0	1	0	0	0	0	0	0	0	0	0	0	0	0	1	UA-ZP	0
932	2022-08-03	1	0	0	0	0	0	0	0	0	0	0	0	0	0	0	0	0	N-A	0
933	2024-02-11	1	0	0	0	0	0	0	0	0	0	0	0	0	0	0	0	1	UA-LV	0
934	2024-09-24	1	1	1	0	0	0	0	0	0	0	0	0	0	0	0	0	1	UA-KY	0
935	2022-08-03	1	0	0	0	0	0	0	0	0	0	0	0	0	0	0	0	0	N-A	0
936	2022-08-03	1	0	0	0	0	0	0	0	0	0	0	0	0	0	0	0	0	N-A	0
937	2024-10-13	1	1	0	1	0	0	0	1	0	0	0	0	0	0	0	0	1	UA-ZH	0
938	2022-08-03	1	1	0	1	0	0	0	0	0	0	0	0	0	0	0	0	1	UA-KY	0
939	2024-05-05	1	0	0	0	0	0	0	0	0	0	0	0	0	0	0	0	0	N-A	0
940	2022-08-03	1	1	0	0	1	0	0	0	0	0	0	0	1	0	0	0	0	N-A	0
941	2022-08-03	1	1	1	1	0	0	0	0	0	0	0	0	0	0	0	0	0	N-A	0
942	2022-08-03	1	1	1	1	1	0	0	0	0	0	0	0	1	0	0	0	0	N-A	0
943	2023-01-21	1	0	0	0	0	0	0	0	0	0	0	0	0	0	0	0	1	UA-LV	0
944	2024-12-13	1	1	0	0	1	0	0	0	0	0	0	0	1	0	0	0	1	UA-KH	0
945	2022-11-09	1	1	0	1	0	0	0	0	0	0	0	0	0	0	0	0	1	UA-CN	0
946	2024-09-18	1	0	0	0	0	0	0	0	0	0	0	0	0	0	0	0	1	UA-TE	0
947	2024-06-10	1	0	0	0	0	0	0	0	0	0	0	0	0	0	0	0	1	UA-KY	0
948	2022-08-05	1	1	0	1	0	0	0	0	0	0	0	0	0	0	0	0	0	N-A	0
949	2022-11-14	1	0	0	0	0	0	0	0	0	0	0	0	0	0	0	0	0	N-A	0
950	2022-08-06	1	1	0	1	0	0	0	0	0	0	0	0	0	0	0	0	1	UA-KY	0
951	2023-04-29	1	0	0	0	0	0	0	0	0	0	0	0	0	0	0	0	0	N-A	0
952	2023-11-21	0	0	0	0	0	0	0	0	0	0	0	0	0	0	0	0	0	N-A	0
953	2024-04-01	1	0	0	0	0	0	0	0	0	0	0	0	0	0	0	0	1	UA-KY	0
954	2024-01-22	1	1	1	0	0	0	0	0	0	0	0	0	0	0	0	0	1	UA-VI	0
955	2023-12-04	1	1	0	1	0	0	0	0	0	0	0	0	0	0	0	0	1	UA-VI	0
956	2023-12-07	1	0	0	0	0	0	0	0	0	0	0	0	0	0	0	0	1	UA-VI	0
957	2024-06-05	1	1	0	1	0	0	0	1	0	0	0	0	0	0	0	0	0	N-A	0
958	2023-07-31	1	0	0	0	0	0	0	0	0	0	0	0	0	0	0	0	1	UA-KY	0
959	2023-12-21	1	0	0	0	0	0	0	0	0	0	0	0	0	0	0	0	1	UA-KY	0
960	2023-12-17	1	0	0	0	0	0	0	0	0	0	0	0	0	0	0	0	1	UA-KY	0
961	2023-11-21	0	0	0	0	0	0	0	0	0	0	0	0	0	0	0	0	0	N-A	0
962	2024-08-31	0	0	0	0	0	0	0	0	0	0	0	0	0	0	0	0	0	N-A	0
963	2023-12-03	1	1	1	0	0	0	0	0	0	0	0	0	0	0	0	0	1	UA-KY	0
964	2022-08-02	1	1	0	1	0	0	0	0	0	0	0	0	0	0	0	0	0	N-A	0
965	2023-11-18	0	0	0	0	0	0	0	0	0	0	0	0	0	0	0	0	0	N-A	0
966	2024-07-03	1	0	0	0	0	0	0	0	0	0	0	0	0	0	0	0	1	UA-VO	0
967	2024-07-24	1	1	0	1	0	0	0	0	0	0	0	0	0	0	0	0	1	UA-LV	0
968	2022-08-02	1	1	0	1	0	0	0	1	0	0	0	0	0	0	0	0	1	UA-KY	0
969	2022-08-02	1	0	0	0	0	0	0	0	0	0	0	0	0	0	0	0	0	N-A	0
970	2025-01-11	1	1	0	1	0	0	0	1	0	0	0	0	0	0	0	0	1	UA-KY	0
971	2024-04-25	1	1	0	1	0	0	0	0	0	0	0	0	0	0	0	0	1	UA-KO	0
972	2022-08-02	1	1	0	0	1	0	0	0	0	0	0	0	1	0	0	0	0	N-A	0
973	2023-07-26	1	1	0	1	0	0	0	0	0	0	0	0	0	0	0	0	1	UA-DP	0
974	2022-12-02	1	1	0	1	0	0	0	0	0	0	0	0	0	0	0	0	1	UA-KY	0
975	2023-06-08	1	0	0	0	0	0	0	0	0	0	0	0	0	0	0	0	0	N-A	0
976	2024-05-07	1	0	0	0	0	0	0	0	0	0	0	0	0	0	0	0	0	N-A	0
977	2024-09-09	0	0	0	0	0	0	0	0	0	0	0	0	0	0	0	0	0	N-A	0
978	2023-12-12	1	1	1	0	0	0	0	0	0	0	0	0	0	0	0	0	1	UA-KY	0
979	2025-01-13	1	1	0	1	0	0	0	1	0	0	0	0	0	0	0	0	1	UA-KY	0
980	2024-07-01	1	1	1	0	0	0	0	0	0	0	0	0	0	0	0	0	1	UA-KY	0
981	2022-08-17	1	0	0	0	0	0	0	0	0	0	0	0	0	0	0	0	0	N-A	0
982	2024-07-10	1	0	0	0	0	0	0	0	0	0	0	0	0	0	0	0	1	UA-LV	0
983	2022-08-02	1	1	1	0	0	0	0	0	0	0	0	0	0	0	0	0	1	UA-KY	0
984	2024-07-13	1	1	0	1	0	0	0	0	0	0	0	0	0	0	0	0	1	UA-OD	0
985	2024-09-19	0	0	0	0	0	0	0	0	0	0	0	0	0	0	0	0	0	N-A	0
986	2024-10-14	1	1	0	1	0	0	0	0	0	0	0	0	0	0	0	0	1	UA-KY	0
987	2024-06-29	1	1	1	0	0	0	0	0	0	0	0	0	0	0	0	0	1	UA-KO	0
988	2024-08-02	1	1	1	1	0	0	0	0	0	0	0	0	0	0	0	0	1	UA-KY	0
989	2023-04-20	1	0	0	0	0	0	0	0	0	0	0	0	0	0	0	0	1	UA-KY	0
990	2024-08-18	1	1	0	1	0	0	0	1	0	0	0	0	0	0	0	0	1	UA-KO	0
991	2023-11-11	1	0	0	0	0	0	0	0	0	0	0	0	0	0	0	0	1	UA-OD	0
992	2023-06-03	1	1	0	1	0	0	0	0	0	0	0	0	0	0	0	0	0	N-A	0
993	2024-04-05	1	0	0	0	0	0	0	0	0	0	0	0	0	0	0	0	1	UA-KY	0
994	2025-01-07	1	0	0	0	0	0	0	0	0	0	0	0	0	0	0	0	1	UA-KY	0
995	2024-12-16	1	0	0	0	0	0	0	0	0	0	0	0	0	0	0	0	1	UA-ZH	0
996	2024-09-29	1	0	0	0	0	0	0	0	0	0	0	0	0	0	0	0	1	UA-KY	0
997	2023-04-14	1	0	0	0	0	0	0	0	0	0	0	0	0	0	0	0	1	UA-KY	0
998	2024-05-05	1	0	0	0	0	0	0	0	0	0	0	0	0	0	0	0	0	N-A	0
999	2023-07-13	1	1	0	1	0	0	0	1	0	0	0	0	0	0	0	0	1	UA-KY	0
1000	2024-03-03	1	1	1	1	0	0	0	0	0	0	0	0	0	0	0	0	1	UA-KO	0
1001	2024-06-08	1	0	0	0	0	0	0	0	0	0	0	0	0	0	0	0	1	UA-KY	0
1002	2022-08-28	1	1	0	1	0	0	0	0	0	0	0	0	0	0	0	0	1	UA-LV	0
1003	2022-08-06	1	0	0	0	0	0	0	0	0	0	0	0	0	0	0	0	1	UA-LV	0
1004	2023-11-11	1	0	0	0	0	0	0	0	0	0	0	0	0	0	0	0	0	N-A	0
1005	2024-05-21	1	1	0	1	0	0	0	0	0	0	0	0	0	0	0	0	1	UA-LV	0
1006	2024-10-22	1	0	0	0	0	0	0	0	0	0	0	0	0	0	0	0	1	UA-DP	0
1007	2023-09-05	1	0	0	0	0	0	0	0	0	0	0	0	0	0	0	0	1	UA-KO	0
1008	2024-11-03	1	0	0	0	0	0	0	0	0	0	0	0	0	0	0	0	1	UA-KY	0
1009	2024-04-24	1	1	1	1	0	0	0	0	0	0	0	0	0	0	0	0	1	UA-KO	0
1010	2022-08-02	1	0	0	0	0	0	0	0	0	0	0	0	0	0	0	0	1	UA-LV	0
1011	2022-11-21	1	1	0	1	1	0	0	0	1	0	0	0	1	0	0	0	1	UA-KY	0
1012	2024-05-05	1	0	0	0	0	0	0	0	0	0	0	0	0	0	0	0	0	N-A	0
1013	2023-05-30	1	0	0	0	0	0	0	0	0	0	0	0	0	0	0	0	0	N-A	0
1014	2022-09-10	1	1	1	0	0	0	0	0	0	0	0	0	0	0	0	0	1	UA-CG	0
1015	2023-09-30	0	0	0	0	0	0	0	0	0	0	0	0	0	0	0	0	0	N-A	0
1016	2022-08-02	1	0	0	0	0	0	0	0	0	0	0	0	0	0	0	0	0	N-A	0
1017	2023-11-21	0	0	0	0	0	0	0	0	0	0	0	0	0	0	0	0	0	N-A	0
1018	2024-09-10	0	0	0	0	0	0	0	0	0	0	0	0	0	0	0	0	0	N-A	0
1019	2022-08-03	1	0	0	0	0	0	0	0	0	0	0	0	0	0	0	0	0	N-A	0
1020	2023-08-09	0	0	0	0	0	0	0	0	0	0	0	0	0	0	0	0	0	N-A	0
1021	2023-12-12	1	1	0	1	0	0	0	0	0	0	0	0	0	0	0	0	1	UA-OD	0
1022	2024-02-09	1	0	0	0	0	0	0	0	0	0	0	0	0	0	0	0	1	UA-LV	0
1023	2024-05-08	1	1	0	1	0	0	0	1	0	0	0	0	0	0	0	0	1	UA-KY	0
1024	2023-12-01	1	0	0	0	0	0	0	0	0	0	0	0	0	0	0	0	0	N-A	0
1025	2024-08-09	1	0	0	0	0	0	0	0	0	0	0	0	0	0	0	0	1	UA-KY	0
1026	2022-08-03	1	0	0	0	0	0	0	0	0	0	0	0	0	0	0	0	0	N-A	0
1027	2024-09-13	0	0	0	0	0	0	0	0	0	0	0	0	0	0	0	0	0	N-A	0
1028	2024-03-04	1	0	0	0	0	0	0	0	0	0	0	0	0	0	0	0	1	UA-KO	0
1029	2024-06-23	1	1	1	0	0	0	0	0	0	0	0	0	0	0	0	0	1	UA-KY	0
1030	2023-12-02	1	0	0	0	0	0	0	0	0	0	0	0	0	0	0	0	1	UA-LV	0
1031	2023-04-28	1	0	0	0	0	0	0	0	0	0	0	0	0	0	0	0	1	UA-KY	0
1032	2024-12-17	1	1	0	1	0	0	0	0	0	0	0	0	0	0	0	0	1	UA-MY	0
1033	2024-05-03	1	0	0	0	0	0	0	0	0	0	0	0	0	0	0	0	0	N-A	0
1034	2024-04-22	1	1	1	1	1	0	0	0	0	0	0	0	1	0	0	0	1	UA-KY	0
1035	2024-05-21	1	0	0	0	0	0	0	0	1	0	0	0	0	0	0	0	0	N-A	1	2024-05-21
1036	2022-08-02	1	1	0	1	0	0	0	1	0	0	0	0	0	0	0	0	1	UA-VI	0
1037	2023-12-01	1	1	0	1	0	0	0	1	0	0	0	0	0	0	0	0	1	UA-VI	0
1038	2024-12-26	1	0	0	0	0	0	0	0	0	0	0	0	0	0	0	0	1	UA-VI	0
1039	2024-12-15	1	1	0	1	0	0	0	0	0	0	0	0	0	0	0	0	1	UA-KY	0
1040	2025-01-17	1	0	0	0	0	0	0	0	0	0	0	0	0	0	0	0	1	UA-KY	0
1041	2024-06-25	1	1	0	1	0	0	0	0	0	0	0	0	0	0	0	0	1	UA-IF	0
1042	2024-02-29	1	0	0	0	0	0	0	0	0	0	0	0	0	0	0	0	1	UA-DP	0
1043	2022-08-02	1	1	0	1	0	0	0	0	0	0	0	0	0	0	0	0	1	UA-DP	0
1044	2023-03-12	1	0	0	0	0	0	0	0	0	0	0	0	0	0	0	0	0	N-A	0
1045	2024-09-14	0	0	0	0	0	0	0	0	0	0	0	0	0	0	0	0	0	N-A	0
1046	2024-04-29	1	1	0	1	0	0	0	1	0	0	0	0	0	0	0	0	0	N-A	0
1047	2023-04-22	1	0	0	0	0	0	0	0	0	0	0	0	0	0	0	0	1	UA-CH	1	2023-04-22
1048	2024-12-30	1	1	1	1	0	0	0	0	0	0	0	0	0	0	0	0	1	UA-KY	0
1049	2024-07-12	1	1	1	0	0	0	0	0	0	0	0	0	0	0	0	0	1	UA-KY	0
1050	2024-05-05	1	1	0	1	0	1	0	1	0	1	0	0	0	0	0	0	1	UA-KH	0
1051	2024-12-30	1	1	0	1	0	0	0	0	0	0	0	0	0	0	0	0	1	UA-CH	0
1052	2024-10-25	1	1	0	1	0	0	0	0	0	0	0	0	0	0	0	0	1	UA-KY	0
1053	2024-09-23	1	1	1	0	0	0	0	0	0	0	0	0	0	0	0	0	1	UA-LV	0
1054	2024-03-07	1	0	0	0	0	0	0	0	0	0	0	0	0	0	0	0	1	UA-DP	0
1055	2023-12-02	1	1	0	1	0	0	0	0	0	0	0	0	0	0	0	0	1	UA-RI	0
1056	2024-05-05	1	1	0	1	0	0	0	0	0	0	0	0	0	0	0	0	1	UA-KY	0
1057	2022-08-02	1	1	0	1	0	0	0	1	0	0	0	0	0	0	0	0	1	UA-KY	0
1058	2024-08-17	1	1	0	1	1	0	0	0	0	0	0	0	1	0	0	0	1	UA-KO	0
1059	2024-12-30	1	1	1	0	0	0	0	0	0	0	0	0	0	0	0	0	1	UA-KY	0
1060	2023-05-05	1	0	0	0	0	0	0	0	0	0	0	0	0	0	0	0	1	UA-KY	0
1061	2023-10-03	1	0	0	0	0	0	0	0	0	0	0	0	0	0	0	0	0	N-A	0
1062	2024-03-18	1	0	0	0	0	0	0	0	0	0	0	0	0	0	0	0	1	UA-KY	0
1063	2023-08-07	1	0	0	0	0	0	0	0	0	0	0	0	0	0	0	0	1	UA-TE	0
1064	2023-06-14	1	0	0	0	0	0	0	0	0	0	0	0	0	0	0	0	0	N-A	0
1065	2024-02-16	1	1	0	1	0	0	0	0	0	0	0	0	0	0	0	0	1	UA-KY	0
1066	2024-08-06	1	1	0	1	0	0	0	0	0	0	0	0	0	0	0	0	1	UA-KY	0
1067	2023-12-03	1	0	0	0	0	0	0	0	0	0	0	0	0	0	0	0	0	N-A	0
1068	2022-10-05	1	1	0	1	1	0	0	1	0	0	0	0	1	0	0	0	1	UA-DP	0
1069	2024-02-27	1	0	0	0	0	0	0	0	0	0	0	0	0	0	0	0	1	UA-KY	0
1070	2022-09-22	1	0	0	0	0	0	0	0	0	0	0	0	0	0	0	0	1	UA-OD	0
1071	2023-05-26	1	0	0	0	0	0	0	0	0	0	0	0	0	0	0	0	1	UA-KY	0
1072	2024-03-12	1	1	0	1	0	0	0	0	0	0	0	0	0	0	0	0	1	UA-KY	0
1073	2023-07-27	1	0	0	0	0	0	0	0	0	0	0	0	0	0	0	0	0	N-A	0
1074	2024-05-05	1	0	0	0	0	0	0	0	0	0	0	0	0	0	0	0	0	N-A	0
1075	2022-10-12	1	0	0	0	0	0	0	0	0	0	0	0	0	0	0	0	1	UA-DP	0
1076	2024-09-21	1	1	0	1	0	0	0	0	0	0	0	0	0	0	0	0	1	UA-KO	0
1077	2022-10-23	1	0	0	0	0	0	0	0	0	0	0	0	0	0	0	0	1	UA-KY	0
1078	2024-09-21	1	0	0	0	0	0	0	0	0	0	0	0	0	0	0	0	1	UA-KY	0
1079	2022-08-03	1	1	0	1	0	0	0	0	0	0	0	0	0	0	0	0	0	N-A	0
1080	2024-03-03	1	1	0	1	1	0	0	0	0	0	0	0	1	0	0	1	1	UA-ZA	0
1081	2022-11-22	1	1	0	1	1	0	0	0	0	0	0	0	1	0	0	0	1	UA-KY	0
1082	2023-09-22	0	0	0	0	0	0	0	0	0	0	0	0	0	0	0	0	0	N-A	0
1083	2024-08-05	1	0	0	0	0	0	0	0	0	0	0	0	0	0	0	0	1	UA-DP	0
1084	2024-05-06	1	1	0	1	0	0	0	0	0	0	0	0	0	0	0	0	1	UA-DP	0
1085	2024-12-01	1	0	0	0	0	0	0	0	0	0	0	0	0	0	0	0	1	UA-LV	0
1086	2023-04-10	1	1	1	0	0	0	0	0	0	0	0	0	0	0	0	0	1	UA-CG	0
1087	2024-09-24	1	0	0	0	0	0	0	0	0	0	0	0	0	0	0	0	1	UA-LV	0
1088	2024-05-05	1	1	0	1	0	0	0	0	0	0	0	0	0	0	0	0	1	UA-KY	0
1089	2023-09-14	0	0	0	0	0	0	0	0	0	0	0	0	0	0	0	0	0	N-A	0
1090	2024-05-05	1	0	0	0	0	0	0	0	0	0	0	0	0	0	0	0	0	N-A	0
1091	2023-12-01	1	1	0	1	0	0	0	0	0	0	0	0	0	0	0	0	1	UA-TE	0
1092	2023-07-07	1	1	0	1	0	0	0	0	0	0	0	0	0	0	0	0	1	UA-KH	0
1093	2022-08-24	1	0	0	0	0	0	0	0	0	0	0	0	0	0	0	0	1	UA-OD	0
1094	2025-01-23	1	1	0	1	0	0	0	0	0	0	0	0	0	0	0	0	1	UA-DP	0
1095	2023-12-03	1	0	0	0	0	0	0	0	0	0	0	0	0	0	0	0	1	UA-KY	0
1096	2022-08-03	1	1	0	0	1	0	0	0	0	0	0	0	0	0	0	1	1	UA-ZA	0
1097	2023-12-20	1	1	1	1	1	0	0	0	0	0	0	0	0	1	0	0	1	UA-VI	0
1098	2024-04-25	1	0	0	0	0	0	0	0	0	0	0	0	0	0	0	0	1	UA-KY	0
1099	2024-07-06	1	1	0	1	0	0	0	0	0	0	0	0	0	0	0	0	0	N-A	0
1100	2022-12-08	1	1	0	1	0	0	0	0	0	0	0	0	0	0	0	0	1	UA-KY	0
1101	2023-11-28	1	0	0	0	0	0	0	0	0	0	0	0	0	0	0	0	1	UA-KY	0
1102	2023-08-05	1	1	1	0	0	0	0	0	0	0	0	0	0	0	0	0	1	UA-KH	0
1103	2024-09-28	1	0	0	0	0	0	0	0	0	0	0	0	0	0	0	0	0	N-A	0
1104	2024-01-24	1	1	0	1	0	0	0	1	0	0	0	0	0	0	0	0	1	UA-KY	0
1105	2024-12-18	1	0	0	0	0	0	0	0	0	0	0	0	0	0	0	0	1	UA-IF	0
1106	2024-11-18	1	0	0	0	0	0	0	0	0	0	0	0	0	0	0	0	0	N-A	0
1107	2024-04-17	1	1	0	1	0	0	0	0	0	0	0	0	0	0	0	0	1	UA-KY	0
1108	2022-08-04	1	1	0	1	0	0	0	0	0	0	0	0	0	0	0	0	1	UA-KY	0
1109	2023-06-04	1	1	0	1	0	0	0	0	0	0	0	0	0	0	0	0	0	N-A	1	2023-06-04
1110	2023-04-06	1	0	0	0	0	0	0	0	0	0	0	0	0	0	0	0	1	UA-LV	0
1111	2023-04-13	1	1	0	1	0	0	0	1	0	0	0	0	0	0	0	0	1	UA-KY	0
1112	2023-09-04	1	1	0	1	0	0	0	0	0	0	1	0	0	0	1	1	1	UA-KO	0
1113	2023-09-16	0	0	0	0	0	0	0	0	0	0	0	0	0	0	0	0	0	N-A	0
1114	2022-11-22	1	1	0	1	1	0	0	0	0	0	0	0	1	0	0	0	1	UA-PO	0
1115	2024-01-17	1	1	0	1	0	0	0	1	0	0	0	0	0	0	0	0	1	UA-KH	0
1116	2023-08-07	1	0	0	0	0	0	0	0	0	0	0	0	0	0	0	0	1	UA-KM	0
1117	2024-10-31	1	1	0	1	0	0	0	0	0	0	0	0	0	0	0	0	1	UA-KY	0
1118	2022-08-04	1	1	1	1	0	0	0	0	0	0	0	0	0	0	0	0	1	UA-SU	0
1119	2024-08-21	1	1	1	1	0	0	0	0	0	0	0	0	0	0	0	0	1	UA-KY	0
1120	2024-04-10	1	1	1	0	0	0	0	0	0	0	0	0	0	0	0	0	1	UA-DP	0
1121	2022-08-03	1	1	1	1	0	0	0	0	0	0	0	0	0	0	0	0	1	UA-KY	0
1122	2024-04-25	1	1	0	1	0	0	0	0	0	0	0	0	0	0	0	0	1	UA-KI	0
1123	2024-05-07	1	1	0	1	0	0	0	0	0	0	0	0	0	0	0	0	1	UA-KO	0
1124	2023-12-05	1	0	0	0	0	0	0	0	0	0	0	0	0	0	0	0	0	N-A	0
1125	2024-12-01	1	0	0	0	0	0	0	0	0	0	0	0	0	0	0	0	1	UA-KY	0
1126	2024-05-18	1	1	0	1	1	0	0	0	0	0	0	0	0	1	0	0	1	UA-KM	0
1127	2022-08-03	1	0	0	0	0	0	0	0	0	0	0	0	0	0	0	0	0	N-A	0
1128	2024-11-24	1	0	0	0	0	0	0	0	0	0	0	0	0	0	0	0	1	UA-CH	0
1129	2023-12-02	1	0	0	0	0	0	0	0	0	0	0	0	0	0	0	0	0	N-A	0
1130	2022-08-03	1	0	0	0	0	0	0	0	0	0	0	0	0	0	0	0	1	UA-VI	0
1131	2022-08-03	1	0	0	0	0	0	0	0	0	0	0	0	0	0	0	0	0	N-A	0
1132	2023-11-21	0	0	0	0	0	0	0	0	0	0	0	0	0	0	0	0	0	N-A	0
1133	2024-07-10	1	1	1	0	0	0	0	0	0	0	0	0	0	0	0	0	1	UA-KY	0
1134	2024-03-27	1	0	0	0	0	0	0	0	0	0	0	0	0	0	0	0	1	UA-ZA	0
1135	2022-10-12	1	0	0	0	0	0	0	0	0	0	0	0	0	0	0	0	0	N-A	0
1136	2022-08-03	1	1	0	1	1	0	0	0	0	0	0	0	1	0	0	0	0	N-A	0
1137	2024-05-18	1	1	1	0	0	0	0	0	0	0	0	0	0	0	0	0	0	N-A	0
1138	2022-08-03	1	0	0	0	0	0	0	0	0	0	0	0	0	0	0	0	0	N-A	0
1139	2024-04-27	1	1	0	1	0	0	0	0	0	0	0	0	0	0	0	0	1	UA-KY	0
1140	2023-12-26	1	1	0	1	1	0	0	1	0	0	0	0	0	0	0	1	0	N-A	0
1141	2022-08-03	1	1	1	1	0	0	0	0	0	0	0	0	0	0	0	0	0	N-A	0
1142	2022-07-21	1	1	0	1	1	0	0	0	0	0	1	0	0	0	0	0	1	UA-PO	0
1143	2024-08-22	1	0	0	0	0	0	0	0	0	0	0	0	0	0	0	0	1	UA-KY	0
1144	2022-08-03	1	1	0	1	0	0	0	0	0	0	0	0	0	0	0	0	1	UA-KY	0
1145	2024-09-23	1	1	1	1	0	0	0	0	0	0	0	0	0	0	0	0	1	UA-SU	0
1146	2023-09-25	0	0	0	0	0	0	0	0	0	0	0	0	0	0	0	0	0	N-A	0
1147	2024-05-05	1	0	0	0	0	0	0	0	0	0	0	0	0	0	0	0	0	N-A	0
1148	2023-08-01	1	1	0	1	0	0	0	0	0	0	0	0	0	0	0	0	1	UA-KH	0
1149	2023-12-01	1	1	0	1	0	0	0	0	0	0	0	0	0	0	0	0	1	UA-KY	0
1150	2023-12-01	1	1	0	1	0	0	0	0	0	0	0	0	0	0	0	0	1	UA-CH	0
1151	2024-01-31	1	1	0	1	0	0	0	0	0	0	0	0	0	0	0	0	1	UA-KY	0
1152	2024-12-08	1	1	0	0	1	0	0	0	0	0	0	0	1	0	0	0	1	UA-KY	0
1153	2022-08-04	1	0	0	0	0	0	0	0	0	0	0	0	0	0	0	0	0	N-A	0
1154	2023-09-20	0	0	0	0	0	0	0	0	0	0	0	0	0	0	0	0	0	N-A	0
1155	2024-11-14	1	1	0	1	0	0	0	0	0	0	0	0	0	0	0	0	1	UA-VI	0
1156	2025-01-16	1	0	0	0	0	0	0	0	0	0	0	0	0	0	0	0	1	UA-KY	0
1157	2022-08-04	1	0	0	0	0	0	0	0	0	0	0	0	0	0	0	0	0	N-A	0
1158	2023-12-01	1	1	0	0	1	0	0	0	0	0	0	0	0	0	1	0	0	N-A	0
1159	2024-12-19	1	1	0	1	0	0	0	0	0	0	0	0	0	0	0	0	1	UA-KY	0
1160	2022-08-02	1	0	0	0	0	0	0	0	0	0	0	0	0	0	0	0	1	UA-ZH	0
1161	2024-09-23	1	1	1	1	0	0	0	0	0	0	0	0	0	0	0	0	1	UA-KY	0
1162	2023-12-02	1	1	0	1	0	0	0	0	1	0	0	0	0	0	0	0	1	UA-CH	0
1163	2022-08-06	1	0	0	0	0	0	0	0	0	0	0	0	0	0	0	0	0	N-A	0
1164	2023-12-01	1	1	0	1	0	0	0	1	0	0	0	0	0	0	0	0	1	UA-RI	0
1165	2022-08-09	1	1	0	1	0	0	0	0	0	0	0	0	0	0	0	0	1	UA-LV	0
1166	2024-02-28	1	1	0	1	0	0	0	0	0	0	0	0	0	0	0	0	0	N-A	0
1167	2022-08-02	1	1	0	1	0	0	0	1	0	0	0	0	0	0	0	0	0	N-A	0
1168	2023-05-29	1	0	0	0	0	0	0	0	0	0	0	0	0	0	0	0	1	UA-ZA	0
1169	2023-11-21	0	0	0	0	0	0	0	0	0	0	0	0	0	0	0	0	0	N-A	0
1170	2023-12-05	1	1	0	1	0	0	0	1	0	0	0	0	0	0	0	0	1	UA-KY	0
1171	2024-04-10	1	1	0	1	1	0	0	0	0	0	0	0	1	0	0	0	1	UA-TE	0
1172	2024-08-10	1	1	1	1	0	0	0	0	0	0	0	0	0	0	0	0	0	N-A	0
1173	2022-08-02	1	0	0	0	0	0	0	0	0	0	0	0	0	0	0	0	0	N-A	0
1174	2024-08-23	1	1	0	1	0	0	0	1	0	0	0	0	0	0	0	0	1	UA-KY	0
1175	2022-08-22	1	1	1	1	0	0	0	0	0	0	0	0	0	0	0	0	0	N-A	0
1176	2024-09-11	0	0	0	0	0	0	0	0	0	0	0	0	0	0	0	0	0	N-A	0
1177	2024-05-05	1	0	0	0	0	0	0	0	0	0	0	0	0	0	0	0	0	N-A	0
1178	2024-01-03	1	1	1	0	0	0	0	0	0	0	0	0	0	0	0	0	1	UA-KY	0
1179	2024-01-08	1	0	0	0	0	0	0	0	0	0	0	0	0	0	0	0	1	UA-KY	0
1180	2022-09-10	1	0	0	0	0	0	0	0	0	0	0	0	0	0	0	0	1	UA-KY	0
1181	2022-08-02	1	0	0	0	0	0	0	0	0	0	0	0	0	0	0	0	0	N-A	0
1182	2022-08-03	1	0	0	0	0	0	0	0	0	0	0	0	0	0	0	0	0	N-A	0
1183	2024-05-10	1	1	0	1	1	0	0	0	0	0	0	0	1	0	0	0	1	UA-VI	0
1184	2024-03-08	1	0	0	0	0	0	0	0	0	0	0	0	0	0	0	0	0	N-A	1	2024-11-01
1185	2022-08-03	1	0	0	0	0	0	0	0	0	0	0	0	0	0	0	0	1	UA-KY	0
1186	2024-09-01	0	0	0	0	0	0	0	0	0	0	0	0	0	0	0	0	0	N-A	0
1187	2023-06-16	1	0	0	0	0	0	0	0	0	0	0	0	0	0	0	0	0	N-A	0
1188	2024-11-29	1	0	0	0	0	0	0	0	0	0	0	0	0	0	0	0	0	N-A	0
1189	2023-06-08	1	1	0	1	0	0	0	0	0	0	0	0	0	0	0	0	0	N-A	0
1190	2022-08-03	1	0	0	0	0	0	0	0	0	0	0	0	0	0	0	0	0	N-A	0
1191	2022-08-02	1	1	0	1	0	0	0	0	0	0	0	0	0	0	0	0	1	UA-KY	0
1192	2024-05-06	1	0	0	0	0	0	0	0	0	0	0	0	0	0	0	0	1	UA-ZP	0
1193	2023-04-07	1	0	0	0	0	0	0	0	0	0	0	0	0	0	0	0	1	UA-PO	0
1194	2022-08-02	1	1	0	1	0	0	0	0	0	0	0	0	0	0	0	0	0	N-A	0
1195	2023-11-30	1	0	0	0	0	0	0	0	0	0	0	0	0	0	0	0	1	UA-KY	0
1196	2024-07-31	1	0	0	0	0	0	0	0	0	0	0	0	0	0	0	0	0	N-A	0
1197	2023-08-30	1	0	0	0	0	0	0	0	0	0	0	0	0	0	0	0	0	N-A	0
1198	2023-06-16	1	1	0	1	0	0	0	1	0	0	0	0	0	0	0	0	0	N-A	1	2023-11-12
1199	2023-12-01	1	0	0	0	0	0	0	0	0	0	0	0	0	0	0	0	0	N-A	0
1200	2022-08-02	1	1	1	1	0	0	0	0	0	0	0	0	0	0	0	0	0	N-A	0
1201	2022-08-06	1	0	0	0	0	0	0	0	0	0	0	0	0	0	0	0	0	N-A	0
1202	2024-05-05	1	1	1	0	0	0	0	0	0	0	0	0	0	0	0	0	1	UA-IF	0
1203	2023-04-26	1	1	0	1	0	0	0	0	0	0	0	0	0	0	0	0	1	UA-KY	0
1204	2022-08-24	1	1	1	1	0	0	0	0	0	0	0	0	0	0	0	0	1	UA-KY	0
1205	2024-03-24	0	0	0	0	0	0	0	0	0	0	0	0	0	0	0	0	0	N-A	0
1206	2024-12-09	1	0	0	0	0	0	0	0	0	0	0	0	0	0	0	0	1	UA-VI	0
1207	2023-06-17	1	0	0	0	0	0	0	0	0	0	0	0	0	0	0	0	1	UA-KO	1	2024-10-15
1208	2023-07-12	1	1	0	1	0	0	0	0	0	0	0	0	0	0	0	0	1	UA-KY	1	2023-12-23
1209	2024-05-14	1	0	0	0	0	0	0	0	0	0	0	0	0	0	0	0	0	N-A	0
1210	2022-08-05	1	0	0	0	0	0	0	0	0	0	0	0	0	0	0	0	0	N-A	0
1211	2023-08-20	1	0	0	0	0	0	0	0	0	0	0	0	0	0	0	0	1	UA-KY	0
1212	2024-06-04	1	0	0	0	0	0	0	0	0	0	0	0	0	0	0	0	1	UA-LV	0
1213	2024-12-14	1	1	1	0	0	0	0	0	0	0	0	0	0	0	0	0	1	UA-RI	0
1214	2024-05-12	1	1	0	1	0	0	0	0	0	0	0	0	0	0	0	0	1	UA-KY	0
1215	2024-09-06	0	0	0	0	0	0	0	0	0	0	0	0	0	0	0	0	0	N-A	0
1216	2023-07-16	1	0	0	0	0	0	0	0	0	0	0	0	0	0	0	0	1	UA-CG	1	2023-10-08
1217	2022-11-26	1	0	0	0	0	0	0	0	0	0	0	0	0	0	0	0	1	UA-VO	0
1218	2024-06-01	1	1	1	0	0	0	0	0	0	0	0	0	0	0	0	0	1	UA-DP	0
1219	2023-08-16	1	1	0	1	0	0	0	0	0	0	0	0	0	0	0	0	1	UA-DP	0
1220	2022-08-03	1	0	0	0	0	0	0	0	0	0	0	0	0	0	0	0	1	UA-ZP	0
1221	2023-07-24	1	0	0	0	0	0	0	0	0	0	0	0	0	0	0	0	1	UA-KY	0
1222	2024-02-29	1	1	0	1	0	0	0	0	0	0	0	0	0	0	0	0	1	UA-KO	0
1223	2023-12-23	1	0	0	0	0	0	0	0	0	0	0	0	0	0	0	0	1	UA-KO	0
1224	2023-08-24	1	1	1	0	0	0	0	0	0	0	0	0	0	0	0	0	1	UA-DP	0
1225	2023-08-06	1	0	0	0	0	0	0	0	0	0	0	0	0	0	0	0	1	UA-KY	0
1226	2023-05-23	1	0	0	0	0	0	0	0	0	0	0	0	0	0	0	0	1	UA-KY	0
1227	2024-05-06	1	1	0	1	0	0	0	0	0	0	0	0	0	0	0	0	1	UA-RI	0
1228	2022-08-09	1	1	0	1	0	0	0	0	0	0	0	0	0	0	0	0	0	N-A	0
1229	2023-12-17	1	1	1	1	0	0	0	0	0	0	0	0	0	0	0	0	1	UA-KO	0
1230	2024-12-03	1	1	1	1	0	0	0	0	0	0	0	0	0	0	0	0	1	UA-KY	0
1231	2024-04-04	1	0	0	0	0	0	0	0	0	0	0	0	0	0	0	0	0	N-A	0
1232	2023-12-14	1	1	1	0	0	0	0	0	0	0	0	0	0	0	0	0	1	UA-ZH	0
1233	2024-10-16	1	0	0	0	0	0	0	0	0	0	0	0	0	0	0	0	1	UA-KY	0
1234	2023-09-06	1	1	0	1	0	0	0	0	0	0	0	0	0	0	0	0	1	UA-KI	0
1235	2024-08-14	1	1	1	0	0	0	0	0	0	0	0	0	0	0	0	0	1	UA-VI	0
1236	2023-08-22	1	1	0	1	0	0	0	0	0	0	0	0	0	0	0	0	1	UA-LV	0
1237	2024-01-24	1	0	0	0	0	0	0	0	0	0	0	0	0	0	0	0	1	UA-PO	0
1238	2024-12-31	1	0	0	0	0	0	0	0	0	0	0	0	0	0	0	0	1	UA-KY	0
1239	2024-10-01	1	1	0	1	0	0	0	0	0	0	0	0	0	0	0	0	1	UA-LV	0
1240	2022-08-03	1	1	0	1	0	0	0	0	0	0	0	0	0	0	0	0	0	N-A	0
1241	2024-06-01	1	1	1	1	0	0	0	0	0	0	0	0	0	0	0	0	1	UA-LV	0
1242	2022-08-02	1	0	0	0	0	0	0	0	0	0	0	0	0	0	0	0	0	N-A	0
1243	2023-07-18	1	1	0	1	0	0	0	1	0	0	0	0	0	0	0	0	1	UA-KO	0
1244	2023-07-16	1	1	0	1	1	0	0	0	0	0	0	0	1	0	0	0	1	UA-KY	0
1245	2024-05-30	1	1	0	1	0	0	0	0	0	0	0	0	0	0	0	0	1	UA-KY	0
1246	2024-05-05	1	0	0	0	0	0	0	0	0	0	0	0	0	0	0	0	0	N-A	0
1247	2023-05-26	1	1	0	1	1	0	0	0	0	0	0	0	0	0	0	1	1	UA-KI	0
1248	2023-12-20	1	1	0	1	0	0	0	0	1	0	0	0	0	0	0	0	1	UA-KY	0
1249	2022-08-03	1	0	0	0	0	0	0	0	0	0	0	0	0	0	0	0	0	N-A	0
1250	2023-07-22	1	0	0	0	0	0	0	1	0	0	0	0	0	0	0	0	1	UA-OD	0
1251	2023-12-02	1	0	0	0	0	0	0	0	0	0	0	0	0	0	0	0	1	UA-CH	0
1252	2024-05-05	1	1	0	1	0	0	0	0	0	0	0	0	0	0	0	0	1	UA-KY	0
1253	2023-04-20	1	1	0	1	0	0	0	0	0	0	0	0	0	0	0	0	0	N-A	0
1254	2024-12-09	1	0	0	0	0	0	0	0	0	0	0	0	0	0	0	0	1	UA-IF	0
1255	2023-01-18	1	1	0	1	0	0	0	0	0	0	0	0	0	0	0	0	0	N-A	0
1256	2023-07-06	1	0	0	0	0	0	0	0	0	0	0	0	0	0	0	0	0	N-A	0
1257	2022-08-02	1	0	0	0	0	0	0	0	0	0	0	0	0	0	0	0	0	N-A	0
1258	2024-08-15	1	1	1	0	0	0	0	0	0	0	0	0	0	0	0	0	1	UA-KY	0
1259	2024-10-27	1	0	0	0	0	0	0	0	0	0	0	0	0	0	0	0	1	UA-VI	0
1260	2022-09-02	1	0	0	0	0	0	0	0	0	0	0	0	0	0	0	0	1	UA-LV	0
1261	2024-01-07	1	1	1	0	0	0	0	0	0	0	0	0	0	0	0	0	1	UA-LV	0
1262	2024-05-05	1	0	0	0	0	0	0	0	0	0	0	0	0	0	0	0	0	N-A	0
1263	2024-02-27	1	1	0	1	0	0	0	0	0	0	0	0	0	0	0	0	1	UA-KY	0
1264	2024-03-23	1	0	0	0	0	0	0	0	0	0	0	0	0	0	0	0	0	N-A	0
1265	2023-12-19	1	1	1	1	0	0	0	0	0	0	0	0	0	0	0	0	1	UA-KY	0
1266	2023-05-17	1	1	0	1	0	0	0	1	0	0	0	0	0	0	0	0	1	UA-LV	0
1267	2024-05-05	1	1	0	1	0	0	0	1	0	0	0	0	0	0	0	0	1	UA-OD	0
1268	2022-08-09	1	1	0	1	0	0	0	0	0	0	0	0	0	0	0	0	1	UA-KY	0
1269	2022-09-28	1	0	0	0	0	0	0	0	0	0	0	0	0	0	0	0	1	UA-KY	0
1270	2024-06-30	1	0	0	0	0	0	0	0	0	0	0	0	0	0	0	0	1	UA-RI	0
1271	2022-11-21	1	0	0	0	0	0	0	0	0	0	0	0	0	0	0	0	1	UA-PO	0
1272	2024-08-24	1	1	1	0	0	0	0	0	0	0	0	0	0	0	0	0	1	UA-KY	0
1273	2024-05-05	1	1	1	0	0	0	0	0	0	0	0	0	0	0	0	0	1	UA-ZA	0
1274	2024-09-18	1	1	0	1	0	0	0	0	0	0	0	0	0	0	0	0	1	UA-KO	0
1275	2024-05-05	1	0	0	0	0	0	0	0	0	0	0	0	0	0	0	0	0	N-A	0
1276	2023-04-28	1	0	0	0	0	0	0	0	0	0	0	0	0	0	0	0	0	N-A	0
1277	2024-12-20	1	1	1	0	0	0	0	0	0	0	0	0	0	0	0	0	1	UA-VI	0
1278	2023-07-25	1	1	0	1	0	0	0	0	0	0	0	0	0	0	0	0	1	UA-KY	0
1279	2023-05-22	1	1	0	1	0	0	0	1	0	0	0	0	0	0	0	0	1	UA-KY	0
1280	2023-12-05	1	1	1	0	0	0	0	0	0	0	0	0	0	0	0	0	0	N-A	0
1281	2022-09-30	1	0	0	0	0	0	0	0	0	0	0	0	0	0	0	0	1	UA-LV	0
1282	2023-08-26	1	1	0	1	0	1	0	1	0	1	0	0	0	0	0	0	1	UA-KY	0
1283	2025-01-19	1	1	0	1	0	0	0	0	0	0	0	0	0	0	0	0	0	N-A	0
1284	2024-04-30	1	0	0	0	0	0	0	0	0	0	0	0	0	0	0	0	1	UA-ZH	0
1285	2022-09-05	1	0	0	0	0	0	0	0	0	0	0	0	0	0	0	0	1	UA-OD	0
1286	2024-04-23	1	1	1	1	1	0	0	0	0	0	0	0	0	1	0	0	1	UA-KM	0
1287	2024-09-30	1	0	0	0	0	0	0	0	0	0	0	0	0	0	0	0	1	UA-KI	0
1288	2023-11-21	0	0	0	0	0	0	0	0	0	0	0	0	0	0	0	0	0	N-A	0
1289	2023-02-06	1	0	0	0	0	0	0	0	0	0	0	0	0	0	0	0	1	UA-CG	0
1290	2024-02-27	1	1	1	0	0	0	0	0	0	0	0	0	0	0	0	0	1	UA-ZH	0
1291	2023-06-03	1	1	0	1	0	0	0	1	0	0	0	0	0	0	0	0	0	N-A	0
1292	2024-11-11	1	1	0	1	0	0	0	0	0	0	0	0	0	0	0	0	1	UA-KY	0
1293	2024-10-28	1	0	0	0	0	0	0	0	0	0	0	0	0	0	0	0	1	UA-KY	0
1294	2024-09-19	0	0	0	0	0	0	0	0	0	0	0	0	0	0	0	0	0	N-A	0
1295	2024-10-10	1	1	0	1	0	0	0	0	0	0	0	0	0	0	0	0	1	UA-KY	0
1296	2023-07-24	1	1	0	1	0	0	0	0	0	0	0	0	0	0	0	0	1	UA-LV	0
1297	2023-12-01	1	0	0	0	0	0	0	0	0	0	0	0	0	0	0	0	0	N-A	0
1298	2023-07-24	1	1	0	0	1	0	0	0	0	0	0	0	0	1	0	0	1	UA-IF	1	2023-07-24
1299	2023-12-01	1	0	0	0	0	0	0	0	0	0	0	0	0	0	0	0	1	UA-LV	0
1300	2022-08-02	1	0	0	0	0	0	0	0	0	0	0	0	0	0	0	0	0	N-A	0
1301	2023-11-23	0	0	0	0	0	0	0	0	0	0	0	0	0	0	0	0	0	N-A	0
1302	2024-02-27	1	1	1	0	0	0	0	0	0	0	0	0	0	0	0	0	1	UA-KO	0
1303	2024-09-27	1	0	0	0	0	0	0	0	0	0	0	0	0	0	0	0	1	UA-KY	0
1304	2024-02-05	1	1	0	1	0	0	0	0	0	0	0	0	0	0	0	0	1	UA-KY	0
1305	2024-05-10	1	1	0	1	0	0	0	0	0	0	0	0	0	0	0	0	1	UA-KY	0
1306	2024-10-28	1	1	1	1	0	0	0	0	0	0	0	0	0	0	0	0	1	UA-RI	0
1307	2023-07-03	1	1	0	1	1	0	0	0	1	0	0	0	1	0	0	0	1	UA-ZP	0
1308	2024-06-30	1	1	0	1	1	0	0	1	0	0	0	0	1	0	0	0	1	UA-LV	0
1309	2024-12-21	1	0	0	0	0	0	0	0	0	0	0	0	0	0	0	0	1	UA-KH	0
1310	2024-03-10	1	0	0	0	0	0	0	0	0	0	0	0	0	0	0	0	1	UA-KY	0
1311	2024-10-07	1	0	0	0	0	0	0	0	0	0	0	0	0	0	0	0	1	UA-KY	0
1312	2024-06-07	1	0	0	0	0	0	0	0	0	0	0	0	0	0	0	0	1	UA-KI	0
1313	2023-12-01	1	1	0	1	0	0	0	0	0	0	0	0	0	0	0	0	0	N-A	0
1314	2022-08-02	1	0	0	0	0	0	0	0	0	0	0	0	0	0	0	0	0	N-A	0
1315	2023-08-09	0	0	0	0	0	0	0	0	0	0	0	0	0	0	0	0	0	N-A	0
1316	2023-12-02	1	0	0	0	0	0	0	0	0	0	0	0	0	0	0	0	1	UA-KY	0
1317	2024-11-26	1	1	0	1	0	0	0	0	0	0	0	0	0	0	0	0	1	UA-KY	0
1318	2022-12-11	1	1	0	1	0	0	0	0	0	0	0	0	0	0	0	0	1	UA-VI	0
1319	2024-10-28	1	1	0	1	0	0	0	0	0	0	0	0	0	0	0	0	1	UA-KY	0
1320	2022-11-15	1	0	0	0	0	0	0	0	0	0	0	0	0	0	0	0	0	N-A	0
1321	2023-11-21	0	0	0	0	0	0	0	0	0	0	0	0	0	0	0	0	0	N-A	0
1322	2024-05-05	1	1	1	1	0	0	0	0	0	0	0	0	0	0	0	0	1	UA-TE	0
1323	2024-05-05	1	0	0	0	0	0	0	0	0	0	0	0	0	0	0	0	1	UA-DP	0
1324	2022-09-07	1	0	0	0	0	0	0	0	0	0	0	0	0	0	0	0	1	UA-KY	0
1325	2022-08-09	1	0	0	0	0	0	0	0	0	0	0	0	0	0	0	0	0	N-A	0
1326	2024-12-28	1	1	0	1	0	0	0	0	0	0	0	0	0	0	0	0	0	N-A	0
1327	2024-04-27	1	0	0	0	0	0	0	0	0	0	0	0	0	0	0	0	1	UA-LV	0
1328	2024-09-15	1	0	0	0	0	0	0	0	0	0	0	0	0	0	0	0	0	N-A	0
1329	2023-08-07	1	1	0	1	0	0	0	1	0	0	0	0	0	0	0	0	1	UA-KY	0
1330	2024-03-02	1	0	0	0	0	0	0	0	0	0	0	0	0	0	0	0	0	N-A	0
1331	2023-11-21	0	0	0	0	0	0	0	0	0	0	0	0	0	0	0	0	0	N-A	0
1332	2022-09-09	1	0	0	0	0	0	0	0	0	0	0	0	0	0	0	0	0	N-A	0
1333	2024-07-31	1	0	0	0	0	0	0	0	0	0	0	0	0	0	0	0	0	N-A	0
1334	2023-12-01	1	0	0	0	0	0	0	0	0	0	0	0	0	0	0	0	1	UA-KO	0
1335	2024-05-06	1	0	0	0	0	0	0	0	0	0	0	0	0	0	0	0	0	N-A	0
1336	2024-02-28	1	1	0	0	1	0	0	0	0	0	0	0	0	1	1	0	1	UA-KY	0
1337	2024-04-11	1	1	0	1	0	0	0	0	0	0	0	0	0	0	0	0	1	UA-KY	0
1338	2024-12-26	1	1	0	1	1	0	0	0	0	0	0	0	0	1	0	0	0	N-A	0
1339	2024-07-13	1	1	1	1	0	0	0	0	0	0	0	0	0	0	0	0	1	UA-LV	0
1340	2022-08-04	1	0	0	0	0	0	0	0	0	0	0	0	0	0	0	0	1	UA-DP	0
1341	2023-08-24	1	0	0	0	0	0	0	0	0	0	0	0	0	0	0	0	1	UA-KY	0
1342	2024-08-29	0	0	0	0	0	0	0	0	0	0	0	0	0	0	0	0	0	N-A	0
1343	2022-08-02	1	1	0	1	0	0	0	0	0	0	0	0	0	0	0	0	1	UA-KY	0
1344	2024-05-05	1	1	0	1	0	0	0	0	0	0	0	0	0	0	0	0	1	UA-KY	0
1345	2022-08-03	1	0	0	0	0	0	0	0	0	0	0	0	0	0	0	0	0	N-A	0
1346	2024-04-28	1	1	0	1	1	1	0	0	0	1	0	0	0	1	0	0	1	UA-IF	0
1347	2024-04-26	1	1	1	1	0	0	0	0	0	0	0	0	0	0	0	0	1	UA-RI	0
1348	2023-11-25	1	0	0	0	0	0	0	0	0	0	0	0	0	0	0	0	0	N-A	0
1349	2024-03-13	1	1	0	1	0	0	0	0	0	0	0	0	0	0	0	0	1	UA-KY	0
1350	2023-12-01	1	0	0	0	0	0	0	0	0	0	0	0	0	0	0	0	0	N-A	0
1351	2024-09-06	0	0	0	0	0	0	0	0	0	0	0	0	0	0	0	0	0	N-A	0
1352	2024-07-10	1	0	0	0	0	0	0	0	0	0	0	0	0	0	0	0	1	UA-OD	0
1353	2024-05-05	1	1	0	1	0	0	0	0	0	0	0	0	0	0	0	0	1	UA-LV	0
1354	2024-03-31	1	0	0	0	0	0	0	0	0	0	0	0	0	0	0	0	1	UA-KY	0
1355	2024-12-29	1	1	1	0	0	0	0	0	0	0	0	0	0	0	0	0	1	UA-KM	0
1356	2022-08-09	1	1	1	1	0	0	0	0	0	0	0	0	0	0	0	0	1	UA-KY	0
1357	2024-09-18	1	1	0	1	0	0	0	0	0	0	0	0	0	0	0	0	1	UA-KY	0
1358	2024-05-05	1	1	0	1	0	0	0	0	0	0	0	0	0	0	0	0	1	UA-KY	0
1359	2024-12-22	1	0	0	0	0	0	0	0	0	0	0	0	0	0	0	0	1	UA-CH	0
1360	2023-09-11	1	0	0	0	0	0	0	0	0	0	0	0	0	0	0	0	0	N-A	0
1361	2024-08-27	0	0	0	0	0	0	0	0	0	0	0	0	0	0	0	0	0	N-A	0
1362	2024-04-30	1	0	0	0	0	0	0	0	0	0	0	0	0	0	0	0	1	UA-KY	0
1363	2024-07-07	1	0	0	0	0	0	0	0	0	0	0	0	0	0	0	0	1	UA-RI	0
1364	2023-07-30	1	1	0	1	1	0	0	0	0	0	0	0	1	0	0	1	1	UA-IF	1	2024-02-22
1365	2024-06-18	1	1	1	1	0	0	0	0	0	0	0	0	0	0	0	0	1	UA-LV	0
1366	2022-08-09	1	0	0	0	0	0	0	0	0	0	0	0	0	0	0	0	0	N-A	0
1367	2024-12-22	1	1	0	1	0	0	0	0	0	0	0	0	0	0	0	0	1	UA-KY	0
1368	2023-12-01	1	1	0	1	0	0	0	0	0	0	0	0	0	0	0	0	1	UA-KM	0
1369	2024-11-23	1	1	0	1	0	0	0	0	0	0	0	0	0	0	0	0	1	UA-KY	0
1370	2022-08-03	1	0	0	0	0	0	0	0	0	0	0	0	0	0	0	0	1	UA-KY	0
1371	2023-04-21	1	0	0	0	0	0	0	0	0	0	0	0	0	0	0	0	1	UA-KY	0
1372	2022-08-10	1	0	0	0	0	0	0	0	0	0	0	0	0	0	0	0	0	N-A	0
1373	2023-08-18	1	1	0	1	0	0	0	0	0	0	0	0	0	0	0	0	1	UA-KY	0
1374	2024-05-06	1	1	1	0	0	0	0	0	0	0	0	0	0	0	0	0	1	UA-KY	0
1375	2024-03-04	1	0	0	0	0	0	0	0	0	0	0	0	0	0	0	0	0	N-A	1	2024-03-04
1376	2022-09-11	1	0	0	0	0	0	0	0	0	0	0	0	0	0	0	0	0	N-A	0
1377	2025-01-02	1	1	0	1	0	0	0	0	0	0	0	0	0	0	0	0	1	UA-CH	0
1378	2024-07-18	1	1	1	0	0	0	0	0	0	0	0	0	0	0	0	0	1	UA-KY	0
1379	2022-08-09	1	1	0	1	0	0	0	0	0	0	0	0	0	0	0	0	0	N-A	0
1380	2024-02-12	1	1	0	1	0	0	0	1	0	0	0	0	0	0	0	0	1	UA-VI	0
1381	2024-06-04	1	1	1	1	0	0	0	0	0	0	0	0	0	0	0	0	1	UA-KY	0
1382	2024-05-05	1	1	0	1	0	0	0	0	0	0	0	0	0	0	0	0	1	UA-RI	0
1383	2024-07-27	1	1	0	1	0	0	0	0	0	0	0	0	0	0	0	0	1	UA-PO	0
1384	2025-01-17	1	0	0	0	0	0	0	0	0	0	0	0	0	0	0	0	1	UA-DP	0
1385	2024-05-05	1	1	0	1	0	0	0	0	0	0	0	0	0	0	0	0	1	UA-ZH	0
1386	2022-08-02	1	1	1	0	0	0	0	0	0	0	0	0	0	0	0	0	1	UA-SU	0
1387	2024-03-04	1	1	1	1	0	0	0	0	0	0	0	0	0	0	0	0	1	UA-DP	0
1388	2024-05-05	1	1	1	1	0	0	0	0	0	0	0	0	0	0	0	0	1	UA-KY	0
1389	2022-11-28	1	1	0	1	0	0	0	1	0	0	0	0	0	0	0	0	1	UA-DP	0
1390	2024-03-31	1	1	0	1	0	1	0	0	0	1	0	0	0	0	0	0	1	UA-KO	0
1391	2022-08-02	1	1	1	1	0	0	0	0	0	0	0	0	0	0	0	0	1	UA-KY	0
1392	2023-12-01	1	0	0	0	0	0	0	0	0	0	0	0	0	0	0	0	1	UA-VI	0
1393	2022-08-02	1	0	0	0	0	0	0	0	0	0	0	0	0	0	0	0	1	UA-IF	0
1394	2023-08-03	1	1	0	0	1	0	0	0	0	0	0	0	1	0	0	0	1	UA-ZP	1	2023-08-03
1395	2023-04-06	1	1	0	1	0	0	0	0	0	0	0	0	0	0	0	0	1	UA-TE	0
1396	2024-03-21	0	0	0	0	0	0	0	0	0	0	0	0	0	0	0	0	0	N-A	0
1397	2024-04-19	1	1	0	1	0	0	0	0	0	0	0	0	0	0	0	0	1	UA-LV	0
1398	2023-07-04	1	0	0	0	0	0	0	0	0	0	0	0	0	0	0	0	0	N-A	0
1399	2023-12-22	1	0	0	0	0	0	0	0	0	0	0	0	0	0	0	0	1	UA-PO	0
1400	2025-01-02	1	1	1	1	0	0	0	0	0	0	0	0	0	0	0	0	1	UA-KY	0
1401	2024-04-23	1	1	0	1	1	0	0	1	0	0	0	0	1	0	0	1	1	UA-LV	0
1402	2024-07-08	1	1	0	1	0	0	0	0	0	0	0	0	0	0	0	0	1	UA-KY	0
1403	2024-10-26	1	0	0	0	0	0	0	0	0	0	0	0	0	0	0	0	1	UA-IF	0
1404	2024-05-05	1	0	0	0	0	0	0	0	0	0	0	0	0	0	0	0	1	UA-RI	0
1405	2022-10-18	1	0	0	0	0	0	0	0	0	0	0	0	0	0	0	0	1	UA-KY	0
1406	2023-09-18	0	0	0	0	0	0	0	0	0	0	0	0	0	0	0	0	0	N-A	0
1407	2024-05-27	1	0	0	0	0	0	0	0	0	0	0	0	0	0	0	0	1	UA-KM	0
1408	2022-12-01	1	1	1	1	0	0	0	0	0	0	0	0	0	0	0	0	0	N-A	0
1409	2024-10-22	1	0	0	0	0	0	0	0	0	0	0	0	0	0	0	0	0	N-A	0
1410	2023-07-14	1	0	0	0	0	0	0	0	0	0	0	0	0	0	0	0	1	UA-KY	0
1411	2024-05-05	1	0	0	0	0	0	0	0	0	0	0	0	0	0	0	0	0	N-A	0
1412	2024-05-13	1	1	0	1	0	0	0	1	0	0	0	0	0	0	0	0	1	UA-KY	0
1413	2022-08-03	1	0	0	0	0	0	0	0	0	0	0	0	0	0	0	0	1	UA-LV	0
1414	2024-09-20	1	1	1	0	0	0	0	0	0	0	0	0	0	0	0	0	1	UA-ZP	0
1415	2023-08-27	1	1	0	1	0	0	0	0	0	0	0	0	0	0	0	0	1	UA-KY	0
1416	2022-08-03	1	1	0	1	0	0	0	0	0	0	0	0	0	0	0	0	0	N-A	0
1417	2023-04-12	1	0	0	0	0	0	0	0	0	0	0	0	0	0	0	0	1	UA-DP	0
1418	2024-11-17	1	1	0	1	0	0	0	1	0	0	0	0	0	0	0	0	1	UA-LV	0
1419	2024-01-21	1	1	0	1	0	0	0	0	0	0	0	0	0	0	0	0	1	UA-DP	0
1420	2024-08-07	1	1	0	1	0	0	0	0	0	0	0	0	0	0	0	0	1	UA-KY	0
1421	2022-08-03	1	0	0	0	0	0	0	0	0	0	0	0	0	0	0	0	0	N-A	0
1422	2023-07-12	1	1	0	1	1	0	0	0	0	0	0	0	1	0	0	0	1	UA-CH	0
1423	2023-07-13	1	0	0	0	0	0	0	0	0	0	0	0	0	0	0	0	0	N-A	0
1424	2023-11-21	0	0	0	0	0	0	0	0	0	0	0	0	0	0	0	0	0	N-A	0
1425	2024-04-25	1	1	0	1	0	0	0	0	0	0	0	0	0	0	0	0	1	UA-VO	0
1426	2024-05-06	1	1	0	1	0	0	0	0	0	0	0	0	0	0	0	0	1	UA-VO	0
1427	2024-12-22	1	0	0	0	0	0	0	0	0	0	0	0	0	0	0	0	1	UA-CN	0
1428	2024-09-27	1	0	0	0	0	0	0	0	0	0	0	0	0	0	0	0	0	N-A	0
1429	2024-11-13	1	1	0	1	0	0	0	0	0	0	0	0	0	0	0	0	1	UA-KY	0
1430	2024-10-08	1	1	0	1	0	0	0	0	0	0	0	0	0	0	0	0	1	UA-KY	0
1431	2024-11-29	1	0	0	0	0	0	0	0	0	0	0	0	0	0	0	0	1	UA-KY	0
1432	2023-08-19	1	0	0	0	0	0	0	0	0	0	0	0	0	0	0	0	1	UA-KY	0
1433	2024-11-29	1	0	0	0	0	0	0	0	0	0	0	0	0	0	0	0	1	UA-VI	0
1434	2024-05-22	1	0	0	0	0	0	0	0	0	0	0	0	0	0	0	0	1	UA-LV	0
1435	2024-08-08	1	0	0	0	0	0	0	0	0	0	0	0	0	0	0	0	1	UA-SU	0
1436	2024-07-30	1	1	0	1	0	0	0	0	0	0	0	0	0	0	0	0	1	UA-KY	0
1437	2023-04-20	1	1	0	0	1	0	0	0	0	0	0	0	1	0	0	0	1	UA-LV	0
1438	2023-08-13	1	1	1	0	0	0	0	0	0	0	0	0	0	0	0	0	1	UA-KY	0
1439	2022-12-12	1	0	0	0	0	0	0	0	0	0	0	0	0	0	0	0	0	N-A	0
1440	2024-05-05	1	0	0	0	0	0	0	0	0	0	0	0	0	0	0	0	1	UA-PO	0
1441	2024-05-05	1	0	0	0	0	0	0	0	0	0	0	0	0	0	0	0	1	UA-KO	0
1442	2023-09-24	0	0	0	0	0	0	0	0	0	0	0	0	0	0	0	0	0	N-A	0
1443	2024-04-12	1	1	0	1	1	0	0	1	0	0	0	0	1	0	0	0	1	UA-KY	0
1444	2024-12-10	1	0	0	0	0	0	0	0	0	0	0	0	0	0	0	0	1	UA-KY	0
1445	2023-09-09	1	1	0	1	0	0	0	0	0	0	0	0	0	0	0	0	1	UA-KY	0
1446	2024-08-04	1	1	0	1	0	0	0	0	0	0	0	0	0	0	0	0	1	UA-DP	0
1447	2024-12-25	1	0	0	0	0	0	0	0	0	0	0	0	0	0	0	0	0	N-A	0
1448	2024-04-11	1	0	0	0	0	0	0	0	0	0	0	0	0	0	0	0	1	UA-KO	0
1449	2024-05-06	1	0	0	0	0	0	0	0	0	0	0	0	0	0	0	0	0	N-A	0
1450	2024-08-18	1	0	0	0	0	0	0	0	0	0	0	0	0	0	0	0	1	UA-KO	0
1451	2024-10-11	1	1	0	1	0	0	0	0	0	0	0	0	0	0	0	0	0	N-A	0
1452	2024-05-05	1	0	0	0	0	0	0	0	0	0	0	0	0	0	0	0	1	UA-ZA	0
1453	2024-04-10	1	0	0	0	0	0	0	0	0	0	0	0	0	0	0	0	0	N-A	0
1454	2024-03-19	1	1	0	1	0	0	0	0	0	0	0	0	0	0	0	0	1	UA-KY	0
1455	2022-08-02	1	1	0	1	0	0	0	0	0	0	0	0	0	0	0	0	0	N-A	0
1456	2024-08-08	1	1	1	1	0	0	0	0	0	0	0	0	0	0	0	0	0	N-A	0
1457	2024-05-05	1	0	0	0	0	0	0	0	0	0	0	0	0	0	0	0	0	N-A	0
1458	2023-12-01	1	0	0	0	0	0	0	0	0	0	0	0	0	0	0	0	1	UA-KY	0
1459	2023-12-02	1	1	0	1	0	0	0	0	0	0	0	0	0	0	0	0	1	UA-KY	0
1460	2022-08-03	1	0	0	0	0	0	0	0	0	0	0	0	0	0	0	0	0	N-A	0
1461	2022-08-03	1	0	0	0	0	0	0	0	0	0	0	0	0	0	0	0	0	N-A	0
1462	2024-03-12	1	1	0	1	0	0	0	0	0	0	0	0	0	0	0	0	1	UA-KY	0
1463	2024-07-01	1	1	1	1	0	0	0	0	0	0	0	0	0	0	0	0	1	UA-LV	0
1464	2023-03-12	1	0	0	0	0	0	0	0	0	0	0	0	0	0	0	0	1	UA-PO	0
1465	2023-08-05	1	0	0	0	0	0	0	0	0	0	0	0	0	0	0	0	1	UA-DP	0
1466	2023-12-01	1	0	0	0	0	0	0	0	0	0	0	0	0	0	0	0	1	UA-KY	0
1467	2023-08-10	1	1	1	1	1	0	0	0	0	0	0	0	0	0	1	0	1	UA-CG	1	2023-11-14
1468	2024-08-07	1	1	1	0	0	0	0	0	0	0	0	0	0	0	0	0	1	UA-KO	0
1469	2022-08-03	1	1	0	1	1	0	0	1	0	0	0	0	1	0	0	0	1	UA-KY	0
1470	2022-11-25	1	0	0	0	0	0	0	0	0	0	0	0	0	0	0	0	0	N-A	0
1471	2022-10-05	1	1	0	1	1	0	0	0	0	0	0	0	1	0	0	0	1	UA-LV	0
1472	2024-05-06	1	1	0	1	0	0	0	0	0	0	0	0	0	0	0	0	1	UA-KI	0
1473	2022-08-03	1	1	0	0	1	0	0	0	0	0	0	0	1	0	0	0	1	UA-KI	0
1474	2023-11-13	1	1	0	1	0	0	0	1	0	0	0	0	0	0	0	0	1	UA-IF	0
1475	2024-05-06	1	1	0	1	0	0	0	0	0	0	0	0	0	0	0	0	1	UA-KO	0
1476	2023-04-20	1	0	0	0	0	0	0	0	0	0	0	0	0	0	0	0	1	UA-MY	0
1477	2024-12-24	1	0	0	0	0	0	0	0	0	0	0	0	0	0	0	0	1	UA-KY	0
1478	2024-05-10	1	1	1	1	0	0	0	0	0	0	0	0	0	0	0	0	1	UA-DP	0
1479	2022-08-06	1	1	0	1	0	0	0	0	0	0	0	0	0	0	0	0	1	UA-LV	0
1480	2022-08-02	1	0	0	0	0	0	0	0	0	0	0	0	0	0	0	0	0	N-A	0
1481	2023-11-21	0	0	0	0	0	0	0	0	0	0	0	0	0	0	0	0	0	N-A	0
1482	2023-12-01	1	0	0	0	0	0	0	0	0	0	0	0	0	0	0	0	1	UA-VO	0
1483	2024-05-05	1	1	0	1	0	0	0	0	0	0	0	0	0	0	0	0	0	N-A	0
1484	2024-02-28	1	1	1	1	0	0	0	0	0	0	0	0	0	0	0	0	1	UA-OD	0
1485	2023-01-27	1	1	0	1	0	0	0	1	0	0	0	0	0	0	0	0	1	UA-MY	0
1486	2022-08-10	1	1	0	1	0	0	0	0	0	0	0	0	0	0	0	0	0	N-A	0
1487	2024-07-25	1	0	0	0	0	0	0	0	0	0	0	0	0	0	0	0	1	UA-ZH	0
1488	2024-09-30	1	0	0	0	0	0	0	0	0	0	0	0	0	0	0	0	1	UA-KY	0
1489	2023-12-01	1	0	0	0	0	0	0	0	0	0	0	0	0	0	0	0	0	N-A	0
1490	2024-04-12	1	1	0	1	0	0	0	0	0	0	0	0	0	0	0	0	1	UA-CH	0
1491	2023-04-20	1	1	1	0	0	0	0	0	0	0	0	0	0	0	0	0	0	N-A	0
1492	2022-08-05	1	0	0	0	0	0	0	0	0	0	0	0	0	0	0	0	0	N-A	0
1493	2024-05-06	1	1	1	1	0	0	0	0	0	0	0	0	0	0	0	0	1	UA-LV	0
1494	2023-12-25	0	0	0	0	0	0	0	0	0	0	0	0	0	0	0	0	0	N-A	0
1495	2024-10-31	1	0	0	0	0	0	0	0	0	0	0	0	0	0	0	0	1	UA-KY	0
1496	2024-06-10	1	1	0	1	0	0	0	0	1	0	0	0	0	0	0	0	1	UA-KY	0
1497	2024-07-09	1	1	1	1	1	0	0	0	0	0	0	0	0	0	0	1	1	UA-KY	0
1498	2024-12-18	1	1	0	1	0	0	0	0	0	0	0	0	0	0	0	0	1	UA-KY	0
1499	2023-12-02	1	0	0	0	0	0	0	0	0	0	0	0	0	0	0	0	0	N-A	0
1500	2023-05-15	1	0	0	0	0	0	0	0	0	0	0	0	0	0	0	0	1	UA-KI	0
1501	2023-07-28	1	1	1	0	0	0	0	0	0	0	0	0	0	0	0	0	1	UA-KY	0
1502	2023-12-15	1	1	0	1	0	0	0	0	0	0	0	0	0	0	0	0	1	UA-KY	0
1503	2024-07-14	1	1	0	1	0	0	0	0	0	0	0	0	0	0	0	0	0	N-A	0
1504	2023-11-21	0	0	0	0	0	0	0	0	0	0	0	0	0	0	0	0	0	N-A	0
1505	2024-04-04	1	1	0	1	0	0	0	0	0	0	0	0	0	0	0	0	1	UA-CH	0
1506	2024-05-05	1	0	0	0	0	0	0	0	0	0	0	0	0	0	0	0	0	N-A	0
1507	2022-12-02	1	0	0	0	0	0	0	0	0	0	0	0	0	0	0	0	0	N-A	0
1508	2023-09-17	0	0	0	0	0	0	0	0	0	0	0	0	0	0	0	0	0	N-A	0
1509	2024-05-05	1	0	0	0	0	0	0	0	0	0	0	0	0	0	0	0	1	UA-OD	0
1510	2022-08-03	1	0	0	0	0	0	0	0	0	0	0	0	0	0	0	0	0	N-A	0
1511	2024-05-05	1	1	0	1	0	0	0	0	0	0	0	0	0	0	0	0	1	UA-KY	0
1512	2023-02-17	1	1	0	1	0	0	0	0	0	0	0	0	0	0	0	0	1	UA-KY	0
1513	2024-10-17	1	1	0	1	0	0	0	0	0	0	0	0	0	0	0	0	1	UA-KY	0
1514	2022-10-24	1	0	0	0	0	0	0	0	0	0	0	0	0	0	0	0	0	N-A	0
1515	2024-01-21	1	1	0	1	0	0	0	0	0	0	0	0	0	0	0	0	1	UA-KY	0
1516	2022-08-02	1	0	0	0	0	0	0	0	0	0	0	0	0	0	0	0	0	N-A	0
1517	2024-04-29	1	1	0	1	0	0	0	1	0	0	0	0	0	0	0	0	1	UA-KY	0
1518	2022-08-06	1	0	0	0	0	0	0	0	0	0	0	0	0	0	0	0	1	UA-KY	0
1519	2024-09-30	1	0	0	0	0	0	0	0	0	0	0	0	0	0	0	0	0	N-A	0
1520	2023-01-10	1	0	0	0	0	0	0	0	0	0	0	0	0	0	0	0	0	N-A	0
1521	2022-08-03	1	0	0	0	0	0	0	0	0	0	0	0	0	0	0	0	0	N-A	0
1522	2023-02-20	1	1	1	0	0	0	0	0	0	0	0	0	0	0	0	0	1	UA-LV	0
1523	2023-12-04	1	1	0	1	0	0	0	0	0	0	0	0	0	0	0	0	1	UA-VI	0
1524	2022-09-12	1	0	0	0	0	0	0	0	0	0	0	0	0	0	0	0	0	N-A	0
1525	2024-03-07	1	1	1	0	0	0	0	0	0	0	0	0	0	0	0	0	1	UA-KO	0
1526	2023-04-12	1	1	0	1	0	0	0	0	0	0	0	0	0	0	0	0	1	UA-KY	0
1527	2024-05-23	1	0	0	0	0	0	0	0	0	0	0	0	0	0	0	0	1	UA-KY	0
1528	2023-12-02	1	0	0	0	0	0	0	0	0	0	0	0	0	0	0	0	0	N-A	0
1529	2022-09-05	1	1	1	1	0	0	0	0	0	0	0	0	0	0	0	0	0	N-A	0
1530	2022-08-04	1	0	0	0	0	0	0	0	0	0	0	0	0	0	0	0	0	N-A	0
1531	2024-10-02	1	0	0	0	0	0	0	0	0	0	0	0	0	0	0	0	1	UA-KY	0
1532	2024-05-26	1	1	1	0	0	0	0	0	0	0	0	0	0	0	0	0	1	UA-KY	0
1533	2024-09-18	0	0	0	0	0	0	0	0	0	0	0	0	0	0	0	0	0	N-A	0
1534	2024-10-29	1	0	0	0	0	0	0	0	0	0	0	0	0	0	0	0	1	UA-KY	0
1535	2024-11-24	1	0	0	0	0	0	0	0	0	0	0	0	0	0	0	0	1	UA-KH	0
1536	2023-09-09	1	1	0	1	0	0	0	0	0	0	0	0	0	0	0	0	1	UA-KY	0
1537	2024-05-05	1	0	0	0	0	0	0	0	0	0	0	0	0	0	0	0	1	UA-KY	0
1538	2022-08-02	1	0	0	0	0	0	0	0	0	0	0	0	0	0	0	0	0	N-A	0
1539	2022-07-21	1	1	1	0	0	0	0	0	0	0	0	0	0	0	0	0	1	UA-DP	0
1540	2022-08-03	1	0	0	0	0	0	0	0	0	0	0	0	0	0	0	0	1	UA-KY	0
1541	2024-05-05	1	0	0	0	0	0	0	0	0	0	0	0	0	0	0	0	1	UA-LV	0
1542	2022-08-09	1	1	0	1	0	0	0	1	0	0	0	0	0	0	0	0	1	UA-KY	0
1543	2024-09-11	0	0	0	0	0	0	0	0	0	0	0	0	0	0	0	0	0	N-A	0
1544	2023-04-09	1	0	0	0	0	0	0	0	0	0	0	0	0	0	0	0	1	UA-DP	0
1545	2022-08-09	1	0	0	0	0	0	0	0	0	0	0	0	0	0	0	0	1	UA-KY	0
1546	2023-04-14	1	1	0	1	0	0	0	0	0	0	0	0	0	0	0	0	0	N-A	0
1547	2024-10-04	1	0	0	0	0	0	0	0	0	0	0	0	0	0	0	0	0	N-A	0
1548	2023-05-06	1	1	0	0	1	0	0	0	0	0	0	0	1	0	0	0	1	UA-LV	0
1549	2024-12-03	1	0	0	0	0	0	0	0	0	0	0	0	0	0	0	0	1	UA-KY	0
1550	2024-09-17	0	0	0	0	0	0	0	0	0	0	0	0	0	0	0	0	0	N-A	0
1551	2024-04-30	1	0	0	0	0	0	0	0	0	0	0	0	0	0	0	0	1	UA-MY	0
1552	2024-04-30	1	1	0	1	0	0	0	0	0	0	0	0	0	0	0	0	1	UA-LV	0
1553	2022-08-04	1	1	0	1	0	0	0	0	0	0	0	0	0	0	0	0	1	UA-KY	0
1554	2022-08-03	1	1	1	1	0	0	0	0	0	0	0	0	0	0	0	0	0	N-A	0
1555	2024-05-06	1	1	0	1	0	0	0	1	1	0	0	0	0	0	0	0	1	UA-LV	0
1556	2024-05-29	1	1	0	1	0	0	0	1	1	0	0	0	0	0	0	0	1	UA-KY	0
1557	2023-11-21	1	1	1	1	0	0	0	0	0	0	0	0	0	0	0	0	1	UA-LV	0
1558	2023-12-01	1	0	0	0	0	0	0	0	0	0	0	0	0	0	0	0	1	UA-KO	0
1559	2024-07-11	1	1	1	1	0	0	0	0	0	0	0	0	0	0	0	0	1	UA-PO	0
1560	2023-08-07	1	1	1	1	0	0	0	0	0	0	0	0	0	0	0	0	1	UA-KY	0
1561	2024-02-16	1	1	0	1	0	0	0	0	0	0	0	0	0	0	0	0	1	UA-IF	0
1562	2022-08-02	1	0	0	0	0	0	0	0	0	0	0	0	0	0	0	0	1	UA-KY	0
1563	2023-05-31	1	0	0	0	0	0	0	0	0	0	0	0	0	0	0	0	0	N-A	0
1564	2022-08-03	1	1	0	1	1	0	0	0	0	0	0	0	0	1	0	0	0	N-A	0
1565	2024-06-03	1	1	0	1	0	0	0	0	0	0	0	0	0	0	0	0	1	UA-CH	0
1566	2024-06-25	1	1	0	1	0	0	0	0	0	0	0	0	0	0	0	0	1	UA-LV	0
1567	2025-01-15	1	1	1	0	0	0	0	0	0	0	0	0	0	0	0	0	1	UA-KY	0
1568	2022-08-03	1	1	0	1	0	0	0	0	0	0	0	0	0	0	0	0	1	UA-LV	0
1569	2024-12-01	1	0	0	0	0	0	0	0	0	0	0	0	0	0	0	0	0	N-A	0
1570	2024-01-30	1	1	1	1	0	0	0	0	0	0	0	0	0	0	0	0	1	UA-KO	0
1571	2024-05-05	1	1	0	1	0	0	0	0	0	0	0	0	0	0	0	0	1	UA-SU	0
1572	2023-11-21	0	0	0	0	0	0	0	0	0	0	0	0	0	0	0	0	0	N-A	0
1573	2024-05-08	1	1	1	1	1	0	0	0	0	0	0	0	0	0	0	1	1	UA-VI	0
1574	2024-05-06	1	0	0	0	0	0	0	0	0	0	0	0	0	0	0	0	1	UA-KY	0
1575	2022-08-02	1	0	0	0	0	0	0	0	0	0	0	0	0	0	0	0	0	N-A	0
1576	2023-07-08	1	1	0	1	0	0	0	1	0	0	0	0	0	0	0	0	1	UA-KY	0
1577	2024-05-07	1	1	1	1	0	0	0	0	0	0	0	0	0	0	0	0	1	UA-LV	0
1578	2024-10-11	1	1	0	1	0	0	0	1	0	0	0	0	0	0	0	0	1	UA-KY	0
1579	2023-08-02	1	0	0	0	0	0	0	0	0	0	0	0	0	0	0	0	1	UA-KY	0
1580	2023-12-15	1	1	0	1	0	0	0	1	0	0	0	0	0	0	0	0	1	UA-CH	0
1581	2023-07-12	1	0	0	0	0	0	0	0	0	0	0	0	0	0	0	0	1	UA-KY	0
1582	2023-12-01	1	0	0	0	0	0	0	0	0	0	0	0	0	0	0	0	1	UA-ZA	0
1583	2024-10-26	1	0	0	0	0	0	0	0	0	0	0	0	0	0	0	0	1	UA-KY	0
1584	2023-02-02	1	0	0	0	0	0	0	0	0	0	0	0	0	0	0	0	0	N-A	0
1585	2024-06-03	1	1	1	0	0	0	0	0	0	0	0	0	0	0	0	0	1	UA-KY	0
1586	2024-02-08	1	1	1	0	0	0	0	0	0	0	0	0	0	0	0	0	1	UA-ZH	0
1587	2024-05-05	1	1	1	0	0	0	0	0	0	0	0	0	0	0	0	0	1	UA-CN	0
1588	2023-08-05	1	1	1	1	0	0	0	0	0	0	0	0	0	0	0	0	1	UA-ZA	0
1589	2024-11-11	1	1	0	1	0	0	0	0	1	0	0	0	0	0	0	0	1	UA-KY	0
1590	2024-06-06	1	1	0	1	0	0	0	0	0	0	0	0	0	0	0	0	1	UA-LV	0
1591	2023-12-01	1	1	0	1	0	0	0	0	0	0	0	0	0	0	0	0	1	UA-IF	0
1592	2023-08-20	1	0	0	0	0	0	0	0	0	0	0	0	0	0	0	0	0	N-A	0
1593	2025-01-01	1	1	0	1	0	0	0	0	0	0	0	0	0	0	0	0	1	UA-CH	0
1594	2022-08-02	1	0	0	0	0	0	0	0	0	0	0	0	0	0	0	0	0	N-A	0
1595	2024-03-15	1	0	0	0	0	0	0	0	0	0	0	0	0	0	0	0	1	UA-KY	0
1596	2024-02-20	1	1	0	1	0	0	0	0	0	0	0	0	0	0	0	0	1	UA-KM	0
1597	2023-04-23	1	1	0	1	0	0	0	0	0	0	0	0	0	0	0	0	1	UA-LV	0
1598	2023-07-21	1	0	0	0	0	0	0	0	0	0	0	0	0	0	0	0	1	UA-KY	0
1599	2023-12-01	1	0	0	0	0	0	0	0	0	0	0	0	0	0	0	0	1	UA-KY	0
1600	2023-04-06	1	1	1	1	1	0	0	0	0	0	0	0	0	0	0	1	1	UA-DO	0
1601	2024-02-02	1	1	1	0	0	0	0	0	0	0	0	0	0	0	0	0	0	N-A	0
1602	2024-05-05	1	0	0	0	0	0	0	0	0	0	0	0	0	0	0	0	0	N-A	0
1603	2024-06-25	1	1	0	1	0	0	0	0	0	0	0	0	0	0	0	0	1	UA-LV	0
1604	2022-12-21	1	0	0	0	0	0	0	0	0	0	0	0	0	0	0	0	1	UA-DP	0
1605	2024-11-02	1	0	0	0	0	0	0	0	0	0	0	0	0	0	0	0	1	UA-KY	0
1606	2024-12-01	1	1	0	1	0	0	0	0	0	0	0	0	0	0	0	0	1	UA-KY	0
1607	2023-12-01	1	1	0	0	1	0	0	0	0	0	0	0	1	0	0	0	0	N-A	0
1608	2024-12-23	1	0	0	0	0	0	0	0	0	0	0	0	0	0	0	0	0	N-A	0
1609	2023-11-29	1	0	0	0	0	0	0	0	0	0	0	0	0	0	0	0	0	N-A	0
1610	2023-04-30	1	1	0	1	1	0	0	1	0	0	0	0	0	0	0	1	0	N-A	0
1611	2024-12-18	1	1	0	1	0	0	0	0	0	0	0	0	0	0	0	0	1	UA-VI	0
1612	2024-01-31	1	0	0	0	0	0	0	0	0	0	0	0	0	0	0	0	1	UA-KH	0
1613	2023-07-18	1	1	0	1	0	0	0	0	0	0	0	0	0	0	0	0	1	UA-KO	0
1614	2022-08-02	1	0	0	0	0	0	0	0	0	0	0	0	0	0	0	0	0	N-A	0
1615	2024-01-23	1	1	0	1	0	0	0	1	0	0	0	0	0	0	0	0	1	UA-RI	0
1616	2024-07-21	1	0	0	0	0	0	0	0	0	0	0	0	0	0	0	0	1	UA-OD	0
1617	2023-05-22	1	0	0	0	0	0	0	0	0	0	0	0	0	0	0	0	0	N-A	0
1618	2023-04-06	1	1	0	1	0	0	0	0	1	0	0	0	0	0	0	0	1	UA-KY	0
1619	2023-11-29	1	0	0	0	0	0	0	0	0	0	0	0	0	0	0	0	1	UA-KY	0
1620	2023-08-21	1	1	0	1	0	0	0	0	0	0	0	0	0	0	0	0	1	UA-KH	0
1621	2024-05-05	1	1	1	1	0	0	0	0	0	0	0	0	0	0	0	0	0	N-A	0
1622	2024-05-06	1	1	1	0	0	0	0	0	0	0	0	0	0	0	0	0	1	UA-KH	0
1623	2024-02-29	1	0	0	0	0	0	0	0	0	0	0	0	0	0	0	0	1	UA-KY	0
1624	2023-08-15	1	1	0	1	0	1	1	1	1	1	0	0	0	0	0	0	1	UA-TE	0
1625	2022-08-03	1	0	0	0	0	0	0	0	0	0	0	0	0	0	0	0	0	N-A	0
1626	2022-08-09	1	0	0	0	0	0	0	0	0	0	0	0	0	0	0	0	0	N-A	0
1627	2022-08-09	1	1	0	0	1	0	0	0	0	0	0	0	0	0	0	1	1	UA-KY	0
1628	2022-12-01	1	0	0	0	0	0	0	0	0	0	0	0	0	0	0	0	0	N-A	0
1629	2024-07-19	1	1	1	1	1	0	0	0	0	0	0	0	1	0	0	0	1	UA-IF	0
1630	2025-01-10	1	1	0	1	0	0	0	0	0	0	0	0	0	0	0	0	1	UA-KY	0
1631	2023-12-04	1	1	1	1	0	0	0	0	0	0	0	0	0	0	0	0	1	UA-VI	0
1632	2024-05-05	1	1	0	1	0	0	0	0	0	0	0	0	0	0	0	0	1	UA-KY	0
1633	2023-12-01	1	0	0	0	0	0	0	0	0	0	0	0	0	0	0	0	1	UA-RI	0
1634	2024-05-14	1	0	0	0	0	0	0	0	0	0	0	0	0	0	0	0	0	N-A	0
1635	2024-02-25	1	1	0	1	0	0	0	0	0	0	0	0	0	0	0	0	1	UA-KY	0
1636	2023-04-06	1	1	0	1	0	0	0	0	0	0	0	0	0	0	0	0	0	N-A	0
1637	2023-02-02	1	1	0	1	0	0	0	0	0	0	0	0	0	0	0	0	0	N-A	0
1638	2023-08-15	1	1	0	1	0	0	0	0	0	0	0	0	0	0	0	0	1	UA-LV	1	2023-08-15
1639	2024-04-04	1	0	0	0	0	0	0	0	0	0	0	0	0	0	0	0	0	N-A	0
1640	2023-07-16	1	0	0	0	0	0	0	0	0	0	0	0	0	0	0	0	0	N-A	0
1641	2022-08-02	1	0	0	0	0	0	0	0	0	0	0	0	0	0	0	0	0	N-A	0
1642	2023-08-26	1	1	0	1	0	0	0	0	0	0	0	0	0	0	0	0	1	UA-OD	0
1643	2024-05-05	1	1	1	0	0	0	0	0	0	0	0	0	0	0	0	0	1	UA-CN	0
1644	2024-12-26	1	1	0	1	1	0	0	0	0	0	0	0	1	0	0	0	1	UA-KY	0
1645	2023-12-01	1	1	0	1	0	0	0	0	0	0	0	0	0	0	0	0	1	UA-OD	0
1646	2022-07-12	1	1	1	1	1	0	0	0	0	0	0	0	1	0	0	0	1	UA-KY	0
1647	2023-11-12	1	0	0	0	0	0	0	0	0	0	0	0	0	0	0	0	1	UA-TE	0
1648	2023-08-20	1	0	0	0	0	0	0	0	0	0	0	0	0	0	0	0	1	UA-RI	1	2023-08-20
1649	2023-04-07	1	0	0	0	0	0	0	0	0	0	0	0	0	0	0	0	1	UA-KY	0
1650	2024-05-05	1	1	0	1	0	0	0	0	0	0	0	0	0	0	0	0	1	UA-KY	0
1651	2023-08-20	1	1	1	0	0	0	0	0	0	0	0	0	0	0	0	0	1	UA-KY	0
1652	2024-03-05	1	1	0	0	1	0	0	0	0	0	0	0	1	0	0	0	1	UA-PO	0
1653	2024-05-05	1	0	0	0	0	0	0	0	0	0	0	0	0	0	0	0	1	UA-CN	0
1654	2024-09-10	0	0	0	0	0	0	0	0	0	0	0	0	0	0	0	0	0	N-A	0
1655	2023-03-24	1	0	0	0	0	0	0	0	0	0	0	0	0	0	0	0	1	UA-ZH	0
1656	2024-02-22	1	1	0	1	0	0	0	0	0	0	0	0	0	0	0	0	1	UA-KY	0
1657	2023-07-07	1	0	0	0	0	0	0	0	0	0	0	0	0	0	0	0	0	N-A	0
1658	2024-08-15	1	0	0	0	0	0	0	0	0	0	0	0	0	0	0	0	1	UA-KY	0
1659	2024-01-15	1	0	0	0	0	0	0	0	0	0	0	0	0	0	0	0	1	UA-LV	0
1660	2024-10-08	1	0	0	0	0	0	0	0	0	0	0	0	0	0	0	0	1	UA-KY	0
1661	2023-07-07	1	1	0	1	0	1	0	0	1	1	0	0	0	0	0	0	1	UA-OD	0
1662	2023-08-28	1	1	0	1	0	0	0	0	0	0	0	0	0	0	0	0	1	UA-KY	0
1663	2023-09-24	1	1	1	1	1	0	0	0	0	0	0	0	1	0	0	0	1	UA-KY	0
1664	2024-12-27	1	0	0	0	0	0	0	0	0	0	0	0	0	0	0	0	0	N-A	0
1665	2024-05-06	1	1	0	1	0	0	0	0	0	0	0	0	0	0	0	0	1	UA-IF	0
1666	2024-12-03	1	1	0	1	0	0	0	0	0	0	0	0	0	0	0	0	1	UA-VI	0
1667	2023-11-17	0	0	0	0	0	0	0	0	0	0	0	0	0	0	0	0	0	N-A	0
1668	2024-02-01	1	1	0	1	0	0	0	1	0	0	0	0	0	0	0	0	1	UA-OD	0
1669	2023-08-20	1	1	1	0	0	0	0	0	0	0	0	0	0	0	0	0	1	UA-ZA	1	2023-08-20
1670	2024-11-17	1	0	0	0	0	0	0	0	0	0	0	0	0	0	0	0	0	N-A	0
1671	2023-11-21	0	0	0	0	0	0	0	0	0	0	0	0	0	0	0	0	0	N-A	0
1672	2022-08-03	1	0	0	0	0	0	0	0	0	0	0	0	0	0	0	0	0	N-A	0
1673	2022-12-01	1	0	0	0	0	0	0	0	0	0	0	0	0	0	0	0	0	N-A	0
1674	2024-04-03	1	1	1	1	0	0	0	0	0	0	0	0	0	0	0	0	1	UA-RI	0
1675	2022-12-26	1	1	0	1	0	0	0	0	0	0	0	0	0	0	0	0	1	UA-ZH	0
1676	2024-10-23	1	0	0	0	0	0	0	1	0	0	0	0	0	0	0	0	1	UA-KY	0
1677	2024-05-05	1	1	0	1	0	0	0	0	0	0	0	0	0	0	0	0	1	UA-KO	0
1678	2024-05-06	1	1	0	1	0	0	0	0	0	0	0	0	0	0	0	0	1	UA-KY	0
1679	2024-03-22	1	0	0	0	0	0	0	0	0	0	0	0	0	0	0	0	0	N-A	0
1680	2022-08-02	1	1	0	1	0	0	0	1	1	0	0	0	0	0	0	0	1	UA-RI	0
1681	2022-08-03	1	0	0	0	0	0	0	0	0	0	0	0	0	0	0	0	0	N-A	0
1682	2023-09-09	1	0	0	0	0	0	0	0	0	0	0	0	0	0	0	0	1	UA-KY	0
1683	2024-04-25	1	1	0	1	0	0	0	0	0	0	0	0	0	0	0	0	1	UA-LV	0
1684	2022-08-02	1	1	0	1	0	0	0	1	0	0	0	0	0	0	0	0	1	UA-KY	0
1685	2023-10-08	0	0	0	0	0	0	0	0	0	0	0	0	0	0	0	0	0	N-A	0
1686	2024-08-19	1	1	0	1	1	0	0	0	0	0	0	0	0	0	0	1	1	UA-KY	0
1687	2023-08-29	1	1	1	1	0	0	0	0	0	0	0	0	0	0	0	0	1	UA-KY	0
1688	2022-08-02	1	0	0	0	0	0	0	0	0	0	0	0	0	0	0	0	0	N-A	0
1689	2023-11-12	1	1	0	1	0	0	0	0	0	0	0	0	0	0	0	0	1	UA-IF	0
1690	2023-05-30	1	1	0	1	0	0	0	0	0	0	0	0	0	0	0	0	1	UA-CH	0
1691	2023-10-07	0	0	0	0	0	0	0	0	0	0	0	0	0	0	0	0	0	N-A	0
1692	2024-05-29	1	1	0	1	1	0	0	0	0	0	0	0	0	1	0	0	1	UA-KY	0
1693	2023-10-05	0	0	0	0	0	0	0	0	0	0	0	0	0	0	0	0	0	N-A	0
1694	2024-06-16	1	1	1	0	0	0	0	0	0	0	0	0	0	0	0	0	1	UA-VI	0
1695	2024-08-25	0	0	0	0	0	0	0	0	0	0	0	0	0	0	0	0	0	N-A	0
1696	2023-04-10	1	0	0	0	0	0	0	0	0	0	0	0	0	0	0	0	1	UA-KY	0
1697	2023-07-18	1	0	0	0	0	0	0	0	0	0	0	0	0	0	0	0	0	N-A	0
1698	2024-09-21	1	1	0	1	0	0	0	1	0	0	0	0	0	0	0	0	1	UA-MY	0
1699	2022-08-03	1	1	0	1	0	0	0	1	0	0	0	0	0	0	0	0	1	UA-CH	0
1700	2024-10-15	1	0	0	0	0	0	0	0	0	0	0	0	0	0	0	0	1	UA-KY	0
1701	2022-08-06	1	0	0	0	0	0	0	0	0	0	0	0	0	0	0	0	0	N-A	0
1702	2023-06-19	1	0	0	0	0	0	0	0	0	0	0	0	0	0	0	0	1	UA-KO	0
1703	2024-04-10	1	1	0	1	0	0	0	0	0	0	0	0	0	0	0	0	1	UA-KY	0
1704	2024-02-29	1	1	0	1	0	0	0	0	0	0	0	0	0	0	0	0	1	UA-KM	0
1705	2024-06-26	1	1	0	1	0	0	0	1	0	0	0	0	0	0	0	0	1	UA-LV	0
1706	2024-05-10	1	1	0	1	0	0	0	1	0	0	0	0	0	0	0	0	1	UA-ZP	0
1707	2024-08-27	0	0	0	0	0	0	0	0	0	0	0	0	0	0	0	0	0	N-A	0
1708	2022-08-09	1	1	0	1	0	0	0	0	0	0	0	0	0	0	0	0	0	N-A	0
1709	2024-07-19	1	1	0	1	0	0	0	1	0	0	0	0	0	0	0	0	1	UA-KI	0
1710	2024-04-25	1	0	0	0	0	0	0	0	0	0	0	0	0	0	0	0	1	UA-KO	0
1711	2024-02-15	1	0	0	0	0	0	0	0	0	0	0	0	0	0	0	0	0	N-A	0
1712	2023-09-01	1	0	0	0	0	0	0	0	0	0	0	0	0	0	0	0	1	UA-KY	0
1713	2023-06-06	1	1	0	1	0	0	0	0	0	0	0	0	0	0	0	0	0	N-A	0
1714	2024-05-19	1	0	0	0	0	0	0	0	0	0	0	0	0	0	0	0	1	UA-KY	0
1715	2024-08-23	1	1	0	1	0	0	0	0	0	0	0	0	0	0	0	0	1	UA-KY	0
1716	2022-08-03	1	1	1	1	1	0	0	0	0	0	0	0	0	1	0	0	1	UA-KY	0
1717	2022-08-05	1	1	0	1	0	0	0	0	0	0	0	0	0	0	0	0	1	UA-KY	0
1718	2023-04-15	1	0	0	0	0	0	0	0	0	0	0	0	0	0	0	0	0	N-A	0
1719	2025-01-20	1	1	1	1	0	0	0	0	0	0	0	0	0	0	0	0	1	UA-KY	0
1720	2023-12-04	1	0	0	0	0	0	0	0	0	0	0	0	0	0	0	0	1	UA-KY	0
1721	2024-05-05	1	0	0	0	0	0	0	0	0	0	0	0	0	0	0	0	1	UA-PO	0
1722	2023-11-19	0	0	0	0	0	0	0	0	0	0	0	0	0	0	0	0	0	N-A	0
1723	2024-01-16	1	0	0	0	0	0	0	0	0	0	0	0	0	0	0	0	1	UA-KY	0
1724	2022-09-12	1	1	0	1	0	0	0	1	0	0	0	0	0	0	0	0	1	UA-CH	0
1725	2024-02-16	1	1	0	1	0	0	0	0	0	0	0	0	0	0	0	0	1	UA-DP	0
1726	2024-05-06	1	1	1	1	1	0	0	0	0	0	0	0	0	0	0	1	1	UA-IF	0
1727	2023-04-10	1	0	0	0	0	0	0	0	0	0	0	0	0	0	0	0	1	UA-SU	0
1728	2024-12-16	1	0	0	0	0	0	0	0	0	0	0	0	0	0	0	0	1	UA-LV	0
1729	2023-06-04	1	1	0	1	0	0	0	1	0	0	0	0	0	0	0	0	0	N-A	0
1730	2024-03-21	0	0	0	0	0	0	0	0	0	0	0	0	0	0	0	0	0	N-A	0
1731	2022-08-03	1	1	0	1	0	0	0	0	0	0	0	0	0	0	0	0	1	UA-CG	0
1732	2023-12-01	1	0	0	0	0	0	0	0	0	0	0	0	0	0	0	0	1	UA-CH	0
1733	2024-04-02	1	0	0	0	0	0	0	0	0	0	0	0	0	0	0	0	1	UA-LV	0
1734	2024-11-04	1	0	0	0	0	0	0	0	0	0	0	0	0	0	0	0	1	UA-KH	0
1735	2024-04-25	1	0	0	0	0	0	0	0	0	0	0	0	0	0	0	0	1	UA-VI	0
1736	2022-08-02	1	1	0	1	0	0	0	1	0	0	0	0	0	0	0	0	1	UA-KY	0
1737	2024-04-14	1	1	0	1	0	0	0	0	0	0	0	0	0	0	0	0	1	UA-LV	0
1738	2022-08-02	1	0	0	0	0	0	0	0	0	0	0	0	0	0	0	0	0	N-A	0
1739	2023-07-23	1	1	0	1	0	0	0	0	0	0	0	0	0	0	0	0	1	UA-KY	0
1740	2022-08-03	1	1	0	1	0	0	0	0	0	0	0	0	0	0	0	0	1	UA-TE	0
1741	2023-08-22	1	0	0	0	0	0	0	0	0	0	0	0	0	0	0	0	1	UA-LV	0
1742	2023-03-07	1	0	0	0	0	0	0	0	0	0	0	0	0	0	0	0	0	N-A	0
1743	2023-05-25	1	0	0	0	0	0	0	0	0	0	0	0	0	0	0	0	1	UA-CG	0
1744	2024-01-03	1	1	0	1	0	0	0	0	0	0	0	0	0	0	0	0	0	N-A	0
1745	2024-03-03	1	0	0	0	0	0	0	0	0	0	0	0	0	0	0	0	1	UA-ZH	0
1746	2024-05-03	1	0	0	0	0	0	0	0	0	0	0	0	0	0	0	0	0	N-A	0
1747	2023-12-01	1	0	0	0	0	0	0	0	0	0	0	0	0	0	0	0	1	UA-DP	0
1748	2025-01-03	1	0	0	0	0	0	0	0	0	0	0	0	0	0	0	0	1	UA-KO	0
1749	2024-04-12	1	0	0	0	0	0	0	0	0	0	0	0	0	0	0	0	1	UA-OD	0
1750	2024-05-08	1	0	0	0	0	0	0	0	0	0	0	0	0	0	0	0	0	N-A	0
1751	2024-05-05	1	1	0	1	0	0	0	1	0	0	0	0	0	0	0	0	1	UA-KY	0
1752	2024-04-21	1	0	0	0	0	0	0	0	0	0	0	0	0	0	0	0	1	UA-VO	0
1753	2023-04-05	1	0	0	0	0	0	0	0	0	0	0	0	0	0	0	0	0	N-A	0
1754	2023-12-03	1	0	0	0	0	0	0	0	0	0	0	0	0	0	0	0	1	UA-DP	0
1755	2024-05-06	1	0	0	0	0	0	0	0	0	0	0	0	0	0	0	0	1	UA-KY	0
1756	2024-02-09	1	1	0	1	0	0	0	0	0	0	0	0	0	0	0	0	1	UA-LV	0
1757	2024-06-17	1	0	0	0	0	0	0	0	0	0	0	0	0	0	0	0	1	UA-KY	0
1758	2024-12-17	1	0	0	0	0	0	0	0	0	0	0	0	0	0	0	0	1	UA-KY	0
1759	2025-01-19	1	1	1	0	0	0	0	0	0	0	0	0	0	0	0	0	1	UA-OD	0
1760	2024-02-11	1	0	0	0	0	0	0	0	0	0	0	0	0	0	0	0	1	UA-OD	0
1761	2024-10-17	1	1	1	0	0	0	0	0	0	0	0	0	0	0	0	0	1	UA-LV	0
1762	2022-08-03	1	1	0	1	0	0	0	0	0	0	0	0	0	0	0	0	1	UA-CG	0
1763	2023-05-04	1	1	0	1	0	0	0	0	0	0	0	0	0	0	0	0	0	N-A	0
1764	2022-08-31	1	1	0	1	0	0	0	0	0	0	0	0	0	0	0	0	1	UA-MY	0
1765	2023-12-01	1	0	0	0	0	0	0	0	0	0	0	0	0	0	0	0	0	N-A	0
1766	2023-12-01	1	0	0	0	0	0	0	0	0	0	0	0	0	0	0	0	1	UA-KY	0
1767	2024-04-17	1	0	0	0	0	0	0	0	0	0	0	0	0	0	0	0	1	UA-RI	0
1768	2024-05-05	1	1	0	1	0	0	0	0	0	0	0	0	0	0	0	0	1	UA-LV	0
1769	2024-11-03	1	0	0	0	0	0	0	0	0	0	0	0	0	0	0	0	1	UA-KY	0
1770	2023-03-29	1	1	1	1	0	0	0	0	0	0	0	0	0	0	0	0	1	UA-CN	0
1771	2024-08-26	0	0	0	0	0	0	0	0	0	0	0	0	0	0	0	0	0	N-A	0
1772	2023-07-11	1	0	0	0	0	0	0	0	0	0	0	0	0	0	0	0	1	UA-KY	0
1773	2023-07-31	1	0	0	0	0	0	0	0	0	0	0	0	0	0	0	0	1	UA-KO	0
1774	2023-12-01	1	0	0	0	0	0	0	0	0	0	0	0	0	0	0	0	0	N-A	0
1775	2024-05-17	1	1	1	1	1	0	0	0	0	0	0	0	0	0	0	1	1	UA-SU	0
1776	2024-07-23	1	1	1	0	0	0	0	0	0	0	0	0	0	0	0	0	1	UA-KY	0
1777	2024-07-16	1	1	1	0	0	0	0	0	0	0	0	0	0	0	0	0	1	UA-DP	0
1778	2023-08-08	1	1	0	1	0	0	0	0	1	0	0	0	0	0	0	0	1	UA-KM	0
1779	2024-09-16	0	0	0	0	0	0	0	0	0	0	0	0	0	0	0	0	0	N-A	0
1780	2024-10-26	1	0	0	0	0	0	0	0	0	0	0	0	0	0	0	0	1	UA-KY	0
1781	2024-05-23	1	1	0	1	1	0	0	0	0	0	0	0	0	0	1	0	1	UA-KY	0
1782	2024-05-12	1	1	0	1	0	0	0	1	0	0	0	0	0	0	0	0	1	UA-KY	0
1783	2022-11-09	1	0	0	0	0	0	0	0	0	0	0	0	0	0	0	0	0	N-A	0
1784	2024-11-07	1	1	0	1	0	0	0	0	0	0	0	0	0	0	0	0	1	UA-KY	0
1785	2023-11-08	1	0	0	0	0	0	0	0	0	0	0	0	0	0	0	0	1	UA-KY	0
1786	2024-06-11	1	0	0	0	0	0	0	0	0	0	0	0	0	0	0	0	1	UA-KO	0
1787	2024-04-08	1	1	0	1	0	0	0	0	0	0	0	0	0	0	0	0	0	N-A	0
1788	2025-01-17	1	0	0	0	0	0	0	0	0	0	0	0	0	0	0	0	1	UA-KH	0
1789	2023-06-27	1	0	0	0	0	0	0	0	0	0	0	0	0	0	0	0	1	UA-KO	0
1790	2022-08-02	1	0	0	0	0	0	0	0	0	0	0	0	0	0	0	0	0	N-A	0
1791	2024-12-03	1	0	0	0	0	0	0	0	0	0	0	0	0	0	0	0	1	UA-RI	0
1792	2023-12-13	1	0	0	0	0	0	0	0	0	0	0	0	0	0	0	0	1	UA-IF	0
1793	2024-05-05	1	1	0	1	0	0	0	0	0	0	0	0	0	0	0	0	1	UA-KH	0
1794	2023-06-27	1	1	0	1	0	0	0	1	0	0	0	0	0	0	0	0	1	UA-KO	0
1795	2023-12-01	1	0	0	0	0	0	0	0	0	0	0	0	0	0	0	0	1	UA-KY	0
1796	2024-07-30	1	1	0	1	1	0	0	0	0	0	0	0	0	0	0	1	1	UA-ZA	0
1797	2024-02-25	1	1	0	1	0	0	0	0	0	0	0	0	0	0	0	0	1	UA-KY	0
1798	2024-07-10	1	0	0	0	0	0	0	0	0	0	0	0	0	0	0	0	0	N-A	0
1799	2024-05-06	1	0	0	0	0	0	0	0	0	0	0	0	0	0	0	0	1	UA-LV	0
1800	2023-06-21	1	0	0	0	0	0	0	0	0	0	0	0	0	0	0	0	1	UA-KO	0
1801	2023-06-29	1	1	0	1	1	0	0	0	0	0	0	0	1	0	0	0	1	UA-KO	0
1802	2024-12-12	1	0	0	0	0	0	0	0	0	0	0	0	0	0	0	0	1	UA-DP	0
1803	2024-11-07	1	0	0	0	0	0	0	0	0	0	0	0	0	0	0	0	1	UA-KY	0
1804	2023-04-20	1	1	0	1	0	0	0	0	0	0	0	0	0	0	0	0	0	N-A	0
1805	2022-08-31	1	1	0	1	0	0	0	0	0	0	0	0	0	0	0	0	1	UA-LV	0
1806	2024-05-22	1	0	0	0	0	0	0	0	0	0	0	0	0	0	0	0	0	N-A	0
1807	2023-12-04	0	0	0	0	0	0	0	0	0	0	0	0	0	0	0	0	0	N-A	0
1808	2024-11-25	1	0	0	0	0	0	0	0	0	0	0	0	0	0	0	0	1	UA-KO	0
1809	2024-02-16	1	1	0	1	0	0	0	0	0	0	0	0	0	0	0	0	1	UA-KY	0
1810	2023-12-02	1	1	1	1	0	0	0	0	0	0	0	0	0	0	0	0	1	UA-ZA	0
1811	2024-04-09	1	1	0	1	0	0	0	1	0	0	0	0	0	0	0	0	1	UA-KY	0
1812	2024-07-29	1	1	1	0	0	0	0	0	0	0	0	0	0	0	0	0	1	UA-DP	0
1813	2023-11-11	1	0	0	0	0	0	0	0	0	0	0	0	0	0	0	0	1	UA-OD	0
1814	2024-10-11	1	0	0	0	0	0	0	0	0	0	0	0	0	0	0	0	1	UA-KO	0
1815	2024-08-09	1	1	0	1	0	0	0	0	0	0	0	0	0	0	0	0	1	UA-KO	0
1816	2024-10-18	1	0	0	0	0	0	0	0	0	0	0	0	0	0	0	0	1	UA-KY	0
1817	2024-12-17	1	0	0	0	0	0	0	0	0	0	0	0	0	0	0	0	1	UA-KY	0
1818	2024-12-29	1	1	0	1	0	0	0	0	0	0	0	0	0	0	0	0	1	UA-VO	0
1819	2024-05-05	1	1	1	1	0	0	0	0	0	0	0	0	0	0	0	0	1	UA-DP	0
1820	2024-03-20	1	0	0	0	0	0	0	0	0	0	0	0	0	0	0	0	0	N-A	0
1821	2022-11-29	1	1	0	0	1	0	0	0	0	0	0	0	0	0	1	0	1	UA-LV	0
1822	2024-07-10	1	1	0	1	0	0	0	0	0	0	0	0	0	0	0	0	1	UA-ZH	0
1823	2024-05-05	1	0	0	0	0	0	0	0	0	0	0	0	0	0	0	0	1	UA-KY	0
1824	2023-06-18	1	0	0	0	0	0	0	0	0	0	0	0	0	0	0	0	0	N-A	0
1825	2023-07-24	1	0	0	0	0	0	0	0	0	0	0	0	0	0	0	0	0	N-A	0
1826	2023-12-02	1	0	0	0	0	0	0	0	0	0	0	0	0	0	0	0	1	UA-KM	0
1827	2024-05-14	1	1	0	1	0	0	0	0	0	0	0	0	0	0	0	0	1	UA-IF	0
1828	2024-06-17	1	0	0	0	0	0	0	0	0	0	0	0	0	0	0	0	1	UA-KO	0
1829	2023-12-01	1	0	0	0	0	0	0	0	0	0	0	0	0	0	0	0	1	UA-KY	0
1830	2024-09-29	1	1	1	1	0	0	0	0	0	0	0	0	0	0	0	0	0	N-A	0
1831	2023-07-10	1	0	0	0	0	0	0	0	0	0	0	0	0	0	0	0	1	UA-PO	0
1832	2023-04-03	1	1	0	0	1	0	0	0	0	0	0	0	1	0	0	0	1	UA-DP	0
1833	2024-04-14	1	1	0	1	0	0	0	1	0	0	0	0	0	0	0	0	1	UA-DP	0
1834	2024-10-29	1	1	0	1	0	0	0	0	0	0	0	0	0	0	0	0	1	UA-SU	0
1835	2024-10-12	1	1	1	1	0	0	0	0	0	0	0	0	0	0	0	0	1	UA-VI	0
1836	2024-05-06	1	1	0	1	0	0	0	0	0	0	0	0	0	0	0	0	0	N-A	0
1837	2023-08-29	1	1	0	1	1	0	0	1	0	0	0	0	1	0	0	0	1	UA-KY	1	2023-08-29
1838	2024-09-27	1	0	0	0	0	0	0	0	0	0	0	0	0	0	0	0	1	UA-DP	0
1839	2023-06-22	1	0	0	0	0	1	0	1	0	1	0	0	0	0	0	0	1	UA-KO	0
1840	2024-11-20	1	0	0	0	0	0	0	0	0	0	0	0	0	0	0	0	0	N-A	0
1841	2024-05-07	1	0	0	0	0	0	0	0	0	0	0	0	0	0	0	0	0	N-A	0
1842	2024-11-25	1	1	1	1	0	0	0	0	0	0	0	0	0	0	0	0	1	UA-KY	0
1843	2022-08-04	1	0	0	0	0	0	0	0	0	0	0	0	0	0	0	0	0	N-A	0
1844	2023-12-06	1	1	0	1	0	0	0	0	0	0	0	0	0	0	0	0	1	UA-KY	0
1845	2024-08-13	1	0	0	0	0	0	0	0	0	0	0	0	0	0	0	0	1	UA-KY	0
1846	2024-08-30	0	0	0	0	0	0	0	0	0	0	0	0	0	0	0	0	0	N-A	0
1847	2024-04-25	1	1	0	1	0	0	0	0	0	0	0	0	0	0	0	0	0	N-A	0
1848	2023-04-20	1	1	0	1	0	0	0	0	0	0	0	0	0	0	0	0	1	UA-CG	0
1849	2024-09-28	1	1	0	1	0	0	0	0	0	0	0	0	0	0	0	0	1	UA-KY	0
1850	2024-06-23	1	0	0	0	0	0	0	0	0	0	0	0	0	0	0	0	1	UA-LV	0
1851	2024-12-01	1	0	0	0	0	0	0	0	0	0	0	0	0	0	0	0	0	N-A	0
1852	2024-05-06	1	0	0	0	0	0	0	0	0	0	0	0	0	0	0	0	1	UA-KO	0
1853	2024-05-06	1	0	0	0	0	0	0	0	0	0	0	0	0	0	0	0	1	UA-MY	0
1854	2024-01-30	1	1	1	1	0	0	0	0	0	0	0	0	0	0	0	0	1	UA-VI	0
1855	2022-08-03	1	1	0	1	0	0	0	0	0	0	0	0	0	0	0	0	1	UA-KY	0
1856	2023-07-31	1	0	0	0	0	0	0	0	0	0	0	0	0	0	0	0	1	UA-KY	0
1857	2024-10-29	1	0	0	0	0	0	0	0	0	0	0	0	0	0	0	0	1	UA-KY	0
1858	2024-05-05	1	1	0	1	0	0	0	1	0	0	0	0	0	0	0	0	1	UA-KY	0
1859	2022-11-04	1	1	0	1	0	0	0	0	0	0	0	0	0	0	0	0	1	UA-KY	0
1860	2022-08-06	1	0	0	0	0	0	0	0	0	0	0	0	0	0	0	0	0	N-A	0
1861	2022-08-02	1	0	0	0	0	0	0	0	0	0	0	0	0	0	0	0	0	N-A	0
1862	2023-12-07	1	1	1	0	0	0	0	0	0	0	0	0	0	0	0	0	1	UA-KO	0
1863	2024-05-15	1	1	1	1	0	0	0	0	0	0	0	0	0	0	0	0	0	N-A	0
1864	2025-01-02	1	0	0	0	0	0	0	0	0	0	0	0	0	0	0	0	0	N-A	0
1865	2022-08-03	1	0	0	0	0	0	0	0	0	0	0	0	0	0	0	0	0	N-A	0
1866	2023-12-02	1	1	0	1	0	0	0	0	0	0	0	0	0	0	0	0	1	UA-CH	0
1867	2024-01-23	1	0	0	0	0	0	0	0	0	0	0	0	0	0	0	0	1	UA-DP	0
1868	2024-05-05	1	0	0	0	0	0	0	0	0	0	0	0	0	0	0	0	1	UA-VO	0
1869	2024-11-10	1	1	0	1	0	0	0	0	0	0	0	0	0	0	0	0	1	UA-MY	0
1870	2024-03-26	1	0	0	0	0	0	0	0	0	0	0	0	0	0	0	0	0	N-A	0
1871	2024-04-18	1	1	1	0	0	0	0	0	0	0	0	0	0	0	0	0	1	UA-LV	0
1872	2023-08-31	1	1	0	1	0	0	0	0	0	0	0	0	0	0	0	0	1	UA-VO	1	2023-09-13
1873	2023-07-16	1	0	0	0	0	0	0	0	0	0	0	0	0	0	0	0	1	UA-KO	1	2023-07-30
1874	2022-12-01	1	1	0	1	0	0	0	0	0	0	0	0	0	0	0	0	0	N-A	0
1875	2022-08-03	1	1	0	1	0	0	0	0	0	0	0	0	0	0	0	0	0	N-A	0
1876	2023-12-01	1	1	0	1	0	0	0	0	0	0	0	0	0	0	0	0	0	N-A	0
1877	2024-06-27	1	1	1	1	0	0	0	0	0	0	0	0	0	0	0	0	1	UA-CH	0
1878	2024-05-27	1	0	0	0	0	0	0	0	0	0	0	0	0	0	0	0	0	N-A	0
1879	2024-11-23	1	0	0	0	0	0	0	0	0	0	0	0	0	0	0	0	1	UA-CG	0
1880	2023-11-21	0	0	0	0	0	0	0	0	0	0	0	0	0	0	0	0	0	N-A	0
1881	2024-05-13	1	1	1	1	0	0	0	0	0	0	0	0	0	0	0	0	1	UA-KY	0
1882	2024-08-15	1	1	0	1	0	0	0	0	0	0	0	0	0	0	0	0	1	UA-DP	0
1883	2024-07-05	1	0	0	0	0	0	0	0	0	0	0	0	0	0	0	0	0	N-A	0
1884	2023-11-23	0	0	0	0	0	0	0	0	0	0	0	0	0	0	0	0	0	N-A	0
1885	2025-01-13	1	1	0	1	0	0	0	0	0	0	0	0	0	0	0	0	1	UA-KY	0
1886	2024-05-06	1	1	0	1	0	0	0	1	1	0	0	0	0	0	0	0	1	UA-KH	0
1887	2025-01-06	1	1	0	1	0	0	0	1	0	0	0	0	0	0	0	0	1	UA-PO	0
1888	2024-10-11	1	0	0	0	0	0	0	0	0	0	0	0	0	0	0	0	1	UA-LV	0
1889	2024-05-05	1	0	0	0	0	0	0	0	0	0	0	0	0	0	0	0	1	UA-KY	0
1890	2022-08-02	1	0	0	0	0	0	0	0	0	0	0	0	0	0	0	0	0	N-A	0
1891	2024-05-16	1	0	0	0	0	0	0	0	0	0	0	0	0	0	0	0	1	UA-KH	0
1892	2022-08-03	1	0	0	0	0	0	0	0	0	0	0	0	0	0	0	0	0	N-A	0
1893	2025-01-07	1	1	1	0	0	0	0	0	0	0	0	0	0	0	0	0	0	N-A	0
1894	2025-01-08	1	1	0	1	0	0	0	0	0	0	0	0	0	0	0	0	1	UA-DP	0
1895	2024-07-25	1	0	0	0	0	0	0	0	0	0	0	0	0	0	0	0	1	UA-PO	0
1896	2023-11-17	1	1	0	1	1	0	1	1	1	0	0	0	0	1	0	0	1	UA-OD	1	2024-11-23
1897	2024-05-06	1	1	1	1	0	0	0	0	0	0	0	0	0	0	0	0	1	UA-KH	0
1898	2024-07-18	1	0	0	0	0	0	0	0	0	0	0	0	0	0	0	0	0	N-A	1	2024-07-18
1899	2024-06-04	1	0	0	0	0	0	0	0	0	0	0	0	0	0	0	0	1	UA-LV	0
1900	2024-05-05	1	1	0	1	0	0	0	0	0	0	0	0	0	0	0	0	1	UA-CH	0
1901	2023-12-01	1	1	0	1	1	0	0	0	0	0	0	0	1	0	0	0	1	UA-RI	0
1902	2024-05-05	1	0	0	0	0	0	0	0	0	0	0	0	0	0	0	0	0	N-A	0
1903	2024-12-04	1	1	0	1	0	0	0	1	0	0	0	0	0	0	0	0	1	UA-PO	0
1904	2024-12-13	1	0	0	0	0	0	0	0	0	0	0	0	0	0	0	0	1	UA-KY	0
1905	2024-03-26	1	1	1	1	0	0	0	0	0	0	0	0	0	0	0	0	1	UA-ZP	0
1906	2024-05-05	1	1	0	1	0	0	0	0	0	0	0	0	0	0	0	0	1	UA-KY	0
1907	2024-05-05	1	1	1	1	0	0	0	0	0	0	0	0	0	0	0	0	1	UA-ZP	0
1908	2024-05-05	1	1	0	1	0	0	0	0	0	0	0	0	0	0	0	0	1	UA-KM	0
1909	2024-10-17	1	0	0	0	0	0	0	0	0	0	0	0	0	0	0	0	1	UA-KY	0
1910	2023-12-14	1	0	0	0	0	0	0	0	0	0	0	0	0	0	0	0	1	UA-VI	0
1911	2023-04-03	1	0	0	0	0	0	0	0	0	0	0	0	0	0	0	0	0	N-A	0
1912	2024-04-27	1	1	0	1	1	0	0	0	0	0	0	0	0	1	0	0	1	UA-DO	0
1913	2024-11-30	1	0	0	0	0	0	0	0	0	0	0	0	0	0	0	0	1	UA-KY	0
1914	2024-09-27	1	0	0	0	0	0	0	0	0	0	0	0	0	0	0	0	1	UA-KY	0
1915	2023-11-21	0	0	0	0	0	0	0	0	0	0	0	0	0	0	0	0	0	N-A	0
1916	2022-09-04	1	1	0	1	0	0	0	0	0	0	0	0	0	0	0	0	0	N-A	0
1917	2024-12-11	1	0	0	0	0	0	0	0	0	0	0	0	0	0	0	0	1	UA-VO	0
1918	2023-12-01	1	0	0	0	0	0	0	0	0	0	0	0	0	0	0	0	0	N-A	0
1919	2024-02-22	1	1	0	1	1	1	1	1	0	0	1	0	0	0	0	0	1	UA-KY	0
1920	2024-11-30	1	0	0	0	0	0	0	0	0	0	0	0	0	0	0	0	1	UA-LV	0
1921	2022-08-02	1	1	0	1	0	0	0	0	0	0	0	0	0	0	0	0	1	UA-KY	0
1922	2024-05-29	1	1	0	1	0	1	0	0	1	1	0	0	0	0	0	0	0	N-A	0
1923	2023-08-09	0	0	0	0	0	0	0	0	0	0	0	0	0	0	0	0	0	N-A	0
1924	2023-12-04	1	1	1	0	0	0	0	0	0	0	0	0	0	0	0	0	1	UA-PO	0
1925	2024-05-22	1	1	0	0	1	0	0	0	0	0	0	0	1	0	0	0	1	UA-TE	0
1926	2024-02-28	1	1	0	1	0	0	0	0	0	0	0	0	0	0	0	0	1	UA-KH	0
1927	2023-11-29	1	0	0	0	0	0	0	0	0	0	0	0	0	0	0	0	1	UA-CH	1	2023-11-29
1928	2024-09-08	0	0	0	0	0	0	0	0	0	0	0	0	0	0	0	0	0	N-A	0
1929	2024-02-23	1	1	0	1	0	0	0	1	0	0	0	0	0	0	0	0	1	UA-KY	0
1930	2023-09-09	1	1	0	1	0	0	0	1	0	0	0	0	0	0	0	0	1	UA-KY	0
1931	2022-08-17	1	1	0	1	0	0	0	0	0	0	0	0	0	0	0	0	1	UA-CN	0
1932	2024-06-24	1	1	1	0	0	0	0	0	0	0	0	0	0	0	0	0	1	UA-ZH	0
1933	2024-05-20	1	0	0	0	0	0	0	0	0	0	0	0	0	0	0	0	1	UA-KY	0
1934	2024-12-01	1	0	0	0	0	0	0	0	0	0	0	0	0	0	0	0	1	UA-DP	0
1935	2022-08-20	1	1	1	1	0	0	0	0	0	0	0	0	0	0	0	0	0	N-A	0
1936	2024-02-16	1	0	0	0	0	0	0	0	0	0	0	0	0	0	0	0	0	N-A	1	2024-02-16
1937	2023-08-09	0	0	0	0	0	0	0	0	0	0	0	0	0	0	0	0	0	N-A	0
1938	2023-11-28	1	0	0	0	0	0	0	0	0	0	0	0	0	0	0	0	1	UA-OD	0
1939	2024-12-28	1	1	0	1	0	0	0	0	0	0	0	0	0	0	0	0	0	N-A	0
1940	2023-06-30	1	0	0	0	0	0	0	0	0	0	0	0	0	0	0	0	0	N-A	0
1941	2022-08-02	1	1	0	1	0	0	0	0	0	0	0	0	0	0	0	0	0	N-A	0
1942	2024-02-23	1	1	0	1	0	0	0	0	0	0	0	0	0	0	0	0	1	UA-KI	0
1943	2024-08-02	1	1	1	0	0	0	0	0	0	0	0	0	0	0	0	0	1	UA-KY	0
1944	2024-08-13	1	1	0	1	0	0	0	0	0	0	0	0	0	0	0	0	0	N-A	0
1945	2025-01-16	1	0	0	0	0	0	0	0	0	0	0	0	0	0	0	0	1	UA-KY	0
1946	2024-06-01	1	1	0	1	0	0	0	0	0	0	0	0	0	0	0	0	0	N-A	0
1947	2023-09-06	1	0	0	0	0	0	0	0	0	0	0	0	0	0	0	0	0	N-A	0
1948	2024-08-10	1	0	0	0	0	0	0	0	0	0	0	0	0	0	0	0	1	UA-OD	0
1949	2024-08-02	1	1	0	1	0	0	0	0	0	0	0	0	0	0	0	0	1	UA-LV	0
1950	2022-10-28	1	0	0	0	0	0	0	0	0	0	0	0	0	0	0	0	1	UA-CH	0
1951	2022-08-22	1	0	0	0	0	0	0	0	0	0	0	0	0	0	0	0	0	N-A	0
1952	2022-11-29	1	0	0	0	0	0	0	0	0	0	0	0	0	0	0	0	1	UA-DP	0
1953	2023-08-20	1	0	0	0	0	0	0	0	0	0	0	0	0	0	0	0	1	UA-KY	0
1954	2023-12-01	1	0	0	0	0	0	0	0	0	0	0	0	0	0	0	0	0	N-A	0
1955	2023-08-15	1	1	0	1	0	0	0	0	0	0	0	0	0	0	0	0	1	UA-KY	0
1956	2023-12-01	1	1	0	1	0	0	0	0	0	0	0	0	0	0	0	0	1	UA-KY	1	2023-12-01
1957	2024-04-21	1	1	0	1	0	0	0	1	0	0	0	0	0	0	0	0	1	UA-DP	0
1958	2023-09-06	1	0	0	0	0	0	0	0	0	0	0	0	0	0	0	0	1	UA-KO	0
1959	2022-08-02	1	1	1	1	0	0	0	0	0	0	0	0	0	0	0	0	1	UA-IF	0
1960	2023-10-09	0	0	0	0	0	0	0	0	0	0	0	0	0	0	0	0	0	N-A	0
1961	2024-10-06	1	0	0	0	0	0	0	0	0	0	0	0	0	0	0	0	0	N-A	0
1962	2023-12-01	1	0	0	0	0	0	0	0	0	0	0	0	0	0	0	0	1	UA-KM	0
1963	2024-11-01	1	1	0	1	1	0	0	0	0	0	0	0	0	0	0	1	1	UA-KI	0
1964	2024-11-18	1	1	1	0	0	0	0	0	0	0	0	0	0	0	0	0	0	N-A	0
1965	2023-09-24	0	0	0	0	0	0	0	0	0	0	0	0	0	0	0	0	0	N-A	0
1966	2023-09-09	1	1	1	0	0	0	0	0	0	0	0	0	0	0	0	0	1	UA-KM	0
1967	2024-09-22	1	1	0	1	0	0	0	0	0	0	0	0	0	0	0	0	1	UA-KY	0
1968	2023-11-24	0	0	0	0	0	0	0	0	0	0	0	0	0	0	0	0	0	N-A	0
1969	2023-08-07	1	1	0	1	0	0	0	0	0	0	0	0	0	0	0	0	1	UA-KM	0
1970	2024-02-07	1	0	0	0	0	0	0	0	0	0	0	0	0	0	0	0	0	N-A	0
1971	2024-12-23	1	1	0	1	0	0	0	0	0	0	0	0	0	0	0	0	0	N-A	0
1972	2024-04-05	1	1	0	1	0	0	0	0	0	0	0	0	0	0	0	0	1	UA-LV	0
1973	2024-07-23	1	1	0	1	0	0	0	0	0	0	0	0	0	0	0	0	1	UA-KO	0
1974	2024-06-05	1	1	1	0	0	0	0	0	0	0	0	0	0	0	0	0	1	UA-TE	0
1975	2024-06-04	1	0	0	0	0	0	0	0	0	0	0	0	0	0	0	0	0	N-A	0
1976	2023-12-05	1	1	0	1	0	0	0	0	0	0	0	0	0	0	0	0	1	UA-SU	0
1977	2022-09-03	0	0	0	0	0	0	0	0	0	0	0	0	0	0	0	0	0	N-A	0
1978	2024-04-08	1	0	0	0	0	0	0	0	0	0	0	0	0	0	0	0	1	UA-KO	0
1979	2024-05-04	1	0	0	0	0	0	0	0	0	0	0	0	0	0	0	0	0	N-A	0
1980	2024-05-12	1	1	0	1	0	0	0	0	0	0	0	0	0	0	0	0	1	UA-KY	0
1981	2024-06-07	1	1	0	1	0	0	0	1	0	0	0	0	0	0	0	0	1	UA-KY	0
1982	2024-01-07	1	0	0	0	0	0	0	0	0	0	0	0	0	0	0	0	1	UA-KH	0
1983	2024-08-16	1	0	0	0	0	0	0	0	0	0	0	0	0	0	0	0	1	UA-CN	0
1984	2025-01-10	1	0	0	0	0	0	0	0	0	0	0	0	0	0	0	0	1	UA-IF	0
1985	2022-08-02	1	1	0	1	0	0	0	0	0	0	0	0	0	0	0	0	0	N-A	0
1986	2025-01-21	1	0	0	0	0	0	0	0	0	0	0	0	0	0	0	0	1	UA-OD	0
1987	2024-01-10	1	0	0	0	0	0	0	0	0	0	0	0	0	0	0	0	1	UA-KM	0
1988	2023-12-01	1	0	0	0	0	0	0	0	0	0	0	0	0	0	0	0	1	UA-DP	1	2024-10-21
1989	2024-05-05	1	0	0	0	0	0	0	0	0	0	0	0	0	0	0	0	1	UA-LV	0
1990	2024-03-22	1	1	1	0	0	0	0	0	0	0	0	0	0	0	0	0	1	UA-KO	0
1991	2023-05-31	1	1	0	1	0	0	0	0	0	0	0	0	0	0	0	0	1	UA-CH	0
1992	2024-06-30	1	1	0	1	0	0	0	0	0	0	0	0	0	0	0	0	1	UA-KY	0
1993	2024-02-27	1	0	0	0	0	0	0	0	0	0	0	0	0	0	0	0	1	UA-LV	0
1994	2024-03-05	1	1	1	1	0	0	0	0	0	0	0	0	0	0	0	0	1	UA-KY	0
1995	2022-08-03	1	1	0	1	1	0	0	0	0	0	0	0	1	0	0	0	1	UA-LV	0
1996	2024-10-28	1	1	1	1	0	0	0	0	0	0	0	0	0	0	0	0	1	UA-LV	0
1997	2024-12-12	1	1	0	1	0	0	0	0	0	0	0	0	0	0	0	0	1	UA-KY	0
1998	2023-12-06	1	0	0	0	0	0	0	0	0	0	0	0	0	0	0	0	1	UA-ZA	0
1999	2024-05-05	1	1	0	1	1	0	0	0	1	0	0	0	1	0	0	0	1	UA-LV	0
[truncated: 2,969 more rows]

## Sheet: dictionary
Column	Description	Data Interpretation
ID	Unique identifier assigned to each user (not the Telegram UID)	Unique identifier number
Registration timestamps	Registration date	date
Initial screening	User completed the preliminary sorting stage	1 = Yes, 0 = No
HIV Infection Risk	Composite indicator showing users with any identified HIV risk factors	1 = Yes, 0 = No
Recent HIV exposure	User reported recent (within 48 hours) potential HIV exposure requiring urgent intervention	1 = Yes, 0 = No
Risky Behavior	User reported behaviors associated with increased HIV transmission risk	1 = Yes, 0 = No
Key Population Member	User self-identified as belonging to a key population group at higher risk for HIV	1 = Yes, 0 = No
Experience with Opioid Substitution Therapy (OST)	User reported participation in opioid substitution therapy	1 = Yes, 0 = No, blank = No answer
Sex with Unknown HIV Status Partner	User reported sexual contact unknown HIV status partner/s	1 = Yes, 0 = No, blank = No answer
Chemsex Experience	User reported using psychoactive substances during sexual activity	1 = Yes, 0 = No, blank = No answer
PWID partner	User reported having sexual partner(s) who inject drugs	1 = Yes, 0 = No, blank = No answer
STI History	User reported history of sexually transmitted infections	1 = Yes, 0 = No, blank = No answer
PWID (People Who Inject Drugs)	User self-identified as person who injects drugs	1 = Yes, 0 = No, blank = Not applicable
Former/Current Prisoners	User self-identified as current or former prisoner	1 = Yes, 0 = No, blank = Not applicable
MSM (Men who have Sex with Men)	User self-identified as man who has sex with men	1 = Yes, 0 = No, blank = Not applicable
SW (Sex Workers)	User self-identified as sex worker	1 = Yes, 0 = No, blank = Not applicable
Transgender People	User self-identified as transgender	1 = Yes, 0 = No, blank = Not applicable
Partners of PLHIV	User self-identified as sexual partner of person living with HIV	1 = Yes, 0 = No, blank = Not applicable
Referred for Testing (Used Search, Received Information and Motivation)	User utilized the chatbot's testing site search function after receiving risk assessment and information	1 = Yes, 0 = No
Region	Geographical location within Ukraine where user is located or seeking services	See dictionary-region
Conversion to and use ARTporuch	Indicates users who met all criteria for potential HIV case identification: (1) registered in both TESTporuch and ARTporuch platforms; (2) completed TESTporuch initial screening; and (3) had a TESTporuch registration timestamp preceding or coinciding with ARTporuch registration.	1 = Yes, 0 = No

## Sheet: dictionary-region
Ukrainian Region	English Translation	Region Code
м. Київ	Kyiv City	UA-KY
Київська область	Kyiv Oblast	UA-KO
Вінницька область	Vinnytsia Oblast	UA-VI
Волинська область	Volyn Oblast	UA-VO
Дніпропетровська область	Dnipropetrovsk Oblast	UA-DP
Донецька область	Donetsk Oblast	UA-DO
Житомирська область	Zhytomyr Oblast	UA-ZH
Закарпатська область	Zakarpattia Oblast	UA-ZA
Запорізька область	Zaporizhzhia Oblast	UA-ZP
Івано-Франківська область	Ivano-Frankivsk Oblast	UA-IF
Кіровоградська область	Kirovohrad Oblast	UA-KI
Луганська область	Luhansk Oblast	UA-LU
Львівська область	Lviv Oblast	UA-LV
Миколаївська область	Mykolaiv Oblast	UA-MY
Одеська область	Odesa Oblast	UA-OD
Полтавська область	Poltava Oblast	UA-PO
Рівненська область	Rivne Oblast	UA-RI
Сумська область	Sumy Oblast	UA-SU
Тернопільська область	Ternopil Oblast	UA-TE
Харківська область	Kharkiv Oblast	UA-KH
Херсонська область	Kherson Oblast	UA-KS
Хмельницька область	Khmelnytskyi Oblast	UA-KM
Черкаська область	Cherkasy Oblast	UA-CH
Чернівецька область	Chernivtsi Oblast	UA-CN
Чернігівська область	Chernihiv Oblast	UA-CG
Не застосовується	Not applicable	N-A
