# Supplementary material for: Digital Health Initiative for HIV Testing Promotion in War-Affected Ukraine: Effectiveness Evaluation
Source: Research Square preprint supplement (doi:10.21203/rs.3.rs-6640828/v1), 2025-09-30
Supplement: Supplementary file 2 [file 6c066eca50ff16b55c4705e5.docx]

# **Appendix 8. Cost Data Modeling and Calculations**

This document presents detailed cost data modeling and calculations used to assess the cost-effectiveness of TESTporuch DHI. Using available HIV testing data from 2021, we created projections for 2022-2024 testing costs, accounting for changing detection rates and testing volumes across these periods. These calculations provide the foundation for the comparative analysis presented in the article.

TESTporuch demonstrated effectiveness, with 3.15% of users who engaged with the platform (146 out of 4,640) being identified as HIV-positive. The total implementation cost was $94,962, resulting in a cost of $650.42 per identified case for the digital component alone.The traditional approach encompasses various outreach activities, physical testing in health facilities, and associated administrative costs.

Based on data from the State Enterprise Center of Public Health of the Ministry of Health of Ukraine [1] and the Joint United Nations Program on HIV/Aids (UNAIDS) [2], the overall HIV testing intervention in 2021 had:

- Total HIV testing intervention budget: approximately $20,000,000
- Number of people tested: 1,992,018
- Cost per person tested: $20,000,000 / 1,992,018 = $10.04

The cost per person tested was $10.04, which includes all components – promotion and physical HIV testing service.

For an accurate comparison, we must consider the costs associated with digital health interventions and the physical HIV testing expenses for TESTporuch users who proceeded to get tested. The available study in Ukraine indicates that the cost of HIV testing services (including administrative expenses) was $7.22 per person in 2018 [3].

Given TESTporuch's 3.15% HIV positivity rate, the testing component cost per identified case is: $7.22 ÷ 0.0315 = $229.21

Therefore, the total cost per identified case through TESTporuch is: $650.42 (digital intervention that reflects HIV testing promotion) + $229.21 (HIV testing services) = $879.63

Using data from 2022-2024 [4] and applying the cost per person tested from 2021, we can model the total expenses for HIV testing interventions from 2022 to 2024:

| **Year** | **People Tested** | **Effectiveness** | **Cases Identified** | **Total Cost** |
| --- | --- | --- | --- | --- |
| 2022 | 1,612,348 | 0.93% | 14,995 | $16,187,974 |
| 2023 | 2,250,660 | 0.63% | 14,179 | $22,596,626 |
| 2024 | 2,587,184 | 0.48% | 12,419 | $25,975,327 |

The average effectiveness for this period is 0.68% (simple arithmetic mean of the three years), making the average cost per identified case: $64,759,927 ÷ (6,450,192 × 0.0068) = **$1,476.55**

Comparing TESTporuch to this average:

- National estimations for 2022-2024: $1,476.55 per identified case
- TESTporuch: $879.63 per identified case

This represents savings of $596.92 (40.4%) per identified case when using TESTporuch compared to the projected average for 2022-2024.

We can approximate the breakdown of costs in the traditional approach by using the cost information for HIV testing services. At a 0.99% effectiveness rate, the testing component costs approximately: $7.22 ÷ 0.0099 = $729.29 per identified case

The difference between the total and testing costs can be attributed to promotion activities: $1,014.12 - $729.29 = $284.83 per identified case.

**References:**

1. Public Health Center of the MOH of Ukraine. Information bulletin: HIV infection in Ukraine. Kyiv: PHC; 2022.
2. UNAIDS. Country Profile – Ukraine. 2024. https://sustainability.unaids.org/country/ukraine/. Accessed 15 Jan 2025.
3. Latypov, Alisher & Duda, Maksym & Dierst-Davies, Rhodri & Pearson, Jonathan & Sereda, Yuliia & Kerr, Cliff & Kuzin, Ihor & Avaliani, Nata. (2018). HIV INVESTMENT CASE STUDY FOR UKRAINE: EVALUATION OF PROGRAM COSTS, SERVICE QUALITY, AND RESOURCE ALLOCATION FOR HIV EXPENDITURE IN 2015.
4. Public Health Center of the MOH of Ukraine. Monitoring of HIV infection in Ukraine. National Portal of Strategic Information in Public Health. https://npsi.phc.org.ua/HIV_Monitoring. Accessed 27 Apr 2025.
