# Supplementary material for: Digital Health Initiative for HIV Testing Promotion in War-Affected Ukraine: Effectiveness Evaluation
Source: Research Square preprint supplement (doi:10.21203/rs.3.rs-6640828/v1), 2025-09-30
Supplement: Supplementary file 3 [file ddc93aa81ed3bbe028dbbbb4.docx]

# **Appendix 7. HIV Positivity Rate Comparison Data and Calculations**

This appendix presents the data and calculations used to compare HIV positivity rates between the TESTporuch digital health intervention (DHI) and national estimates from 2022-2024. The calculations were performed to ensure an appropriate comparison with our intervention period (August 2022 through January 2025).

The table below presents HIV positivity rates (effectiveness) across different population groups based on data from the Center of Public Health of the Ministry of Health of Ukraine.

| **Population Group** | **HIV Positivity Rate (%)** | | |
| --- | --- | --- | --- |
| *Year* | *2022* | *2023* | *2024* |
| Overall [1] | 0.93 | 0.63 | 0.48 |
| Key populations [2] | 4.16 | 2.66 | 2.37 |
| General population [3] | 0.47 | 0.31 | 0.27 |
| MSM [4] | 2.35 | 3.11 | 2.44 |
| Former prisoners [5] | 0.58 | 0.56 | 0.6 |
| PWID [6] | 6.04 | 3.64 | 3.27 |
| Partners of PLHIV [7] | 9.62 | 7.95 | 6.8 |

To ensure appropriate comparison with our intervention period (August 2022 through January 2025), we calculated average HIV positivity rates across the three years for each population group. Simple arithmetic means were used: Average HIV positivity rate = (0.47 + 0.31 + 0.27) ÷ 3 = 0.35%. The table below shows the comparison between TESTporuch DHI HIV positivity rates and the calculated national averages:

| **Population Group** | **TESTporuch DHI (%)** | **National Estimates (%)** | **Difference (%)** | **Percent Increase (%)** |
| --- | --- | --- | --- | --- |
| Overall | 3.15 | 0.68 | 2.47 | 363 |
| Key populations | 7.91 | 3.06 | 4.85 | 159 |
| General population | 2.66 | 0.35 | 2.31 | 660 |
| MSM | 9.62 | 2.63 | 6.99 | 266 |
| Former prisoners | 14.29 | 0.58 | 13.71 | 2,364 |
| PWID | 10.81 | 4.32 | 6.49 | 150 |
| Partners of PLHIV | 7.69 | 8.12 | -0.43 | -5 |

The percent increase was calculated using the formula: Percent increase = ((TESTporuch rate - National rate) ÷ National rate) × 100%. For example, for the overall comparison: Percent increase = ((3.15 - 0.68) ÷ 0.68) × 100% = 363%

**References:**

1. Public Health Center of the MOH of Ukraine. Monitoring of HIV infection in Ukraine - Seroepidemiological monitoring of HIV spread - Overall. National Portal of Strategic Information in Public Health. https://npsi.phc.org.ua/HIV_Monitoring?indicator=123&tab=infographics. Accessed 27 Apr 2025.
2. Public Health Center of the MOH of Ukraine. Monitoring of HIV infection in Ukraine - Seroepidemiological monitoring of HIV spread - Key populations. National Portal of Strategic Information in Public Health. https://npsi.phc.org.ua/HIV_Monitoring?indicator=294&tab=infographics. Accessed 27 Apr 2025.
3. Public Health Center of the MOH of Ukraine. Monitoring of HIV infection in Ukraine - Seroepidemiological monitoring of HIV spread - General population. National Portal of Strategic Information in Public Health. https://npsi.phc.org.ua/HIV_Monitoring?indicator=607&tab=infographics. Accessed 27 Apr 2025.
4. Public Health Center of the MOH of Ukraine. Monitoring of HIV infection in Ukraine - Seroepidemiological monitoring of HIV spread - MSM. National Portal of Strategic Information in Public Health. https://npsi.phc.org.ua/HIV_Monitoring?indicator=285&tab=infographics. Accessed 27 Apr 2025.
5. Public Health Center of the MOH of Ukraine. Monitoring of HIV infection in Ukraine - Seroepidemiological monitoring of HIV spread – Prisoners. National Portal of Strategic Information in Public Health. https://npsi.phc.org.ua/HIV_Monitoring?indicator=292&tab=infographics. Accessed 27 Apr 2025.
6. Public Health Center of the MOH of Ukraine. Monitoring of HIV infection in Ukraine - Seroepidemiological monitoring of HIV spread - PWID. National Portal of Strategic Information in Public Health. https://npsi.phc.org.ua/HIV_Monitoring?indicator=131&tab=infographics. Accessed 27 Apr 2025.
7. Public Health Center of the MOH of Ukraine. Monitoring of HIV infection in Ukraine - Seroepidemiological monitoring of HIV spread - Partners of PLHIV. National Portal of Strategic Information in Public Health. https://npsi.phc.org.ua/HIV_Monitoring?indicator=123&tab=infographics. Accessed 27 Apr 2025.
