# Supplementary figures and images for: Digital Health Initiative for HIV Testing Promotion in War-Affected Ukraine: Effectiveness Evaluation
Source: Research Square preprint supplement (doi:10.21203/rs.3.rs-6640828/v1), 2025-09-30

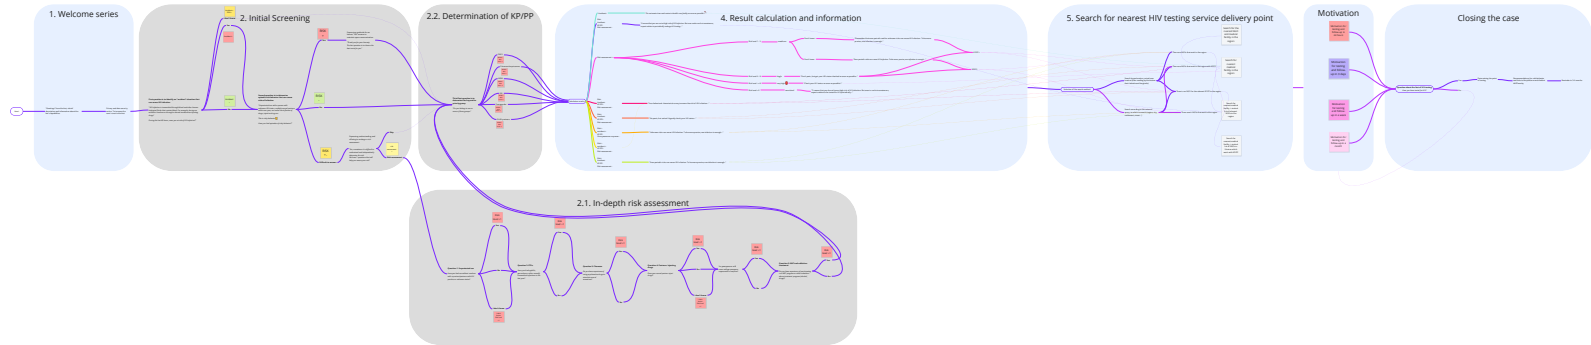

Supplement: Supplementary file 1 [file 32a8d60e55b9b8b152e69849.pdf]
